# Supplementary material
Source: publisher figshare collection journal article supplement (https://acs.figshare.com/ndownloader/files/14720285)
Supplement: Supplementary file 1 [file 14720285]

## Sheet: Step I obtain J₀
Table S3A. Obtain log₁₀[J₀/v (V⁻¹)] from σs/S̅
σs/S̅	log₁₀[J₀/v (V⁻¹)]
0.006	48.75
0.007	42.06
0.008	37.03
0.009	33.12
0.01	29.98
0.011	27.41
0.012	25.27
0.013	23.45
0.014	21.89
0.015	20.54
0.016	19.36
0.017	18.32
0.018	17.39
0.019	16.55
0.02	15.8
0.022	14.5
0.024	13.42
0.026	12.5
0.028	11.71
0.03	11.03
0.032	10.43
0.034	9.9
0.036	9.43
0.038	9
0.04	8.62
0.042	8.28
0.044	7.96
0.046	7.68
0.048	7.41
0.05	7.17
0.055	6.64
0.06	6.2
0.065	5.82
0.07	5.5
0.075	5.22
0.08	4.98
0.085	4.76
0.09	4.57
0.095	4.4
0.1	4.25
0.12	3.75
0.14	3.39
0.16	3.11
0.18	2.89
0.2	2.72
0.25	2.4
0.3	2.27

## Sheet: Step II obtain θ
Table S3B. Obtain θ from S̅ and log₁₀[J₀/v (V⁻¹)]
log₁₀[J₀/v (V⁻¹)]	3	3.5	4	4.5	5	5.5	6	6.5	7	7.5	8	8.5	9	9.5	10	10.5	11	11.5	12	12.5	13	13.5	14	14.5	15	15.5	16	16.5	17	17.5	18	18.5	19	19.5	20	20.5	21	21.5	22	22.5	23	23.5	24	24.5	25	25.5	26	26.5	27
S̅
5								176.962	176.888	176.818	176.751	176.686	176.624	176.563	176.505	176.448	176.393	176.339	176.287	176.236	176.185	176.137	176.088	176.041	175.997	175.962	175.927	175.891	175.86	175.828	175.792	175.765	175.729	175.702	175.668	175.642	175.607	175.586	175.546	175.525	175.495	175.463	175.445	175.405	175.385	175.363	175.326	175.304	175.285
10	176.991	176.739	176.515	176.313	176.127	175.964	175.837	175.717	175.603	175.493	175.389	175.288	175.191	175.097	175.006	174.932	174.862	174.793	174.726	174.661	174.597	174.535	174.474	174.414	174.355	174.298	174.241	174.185	174.131	174.077	174.024	173.976	173.933	173.89	173.847	173.806	173.765	173.724	173.684	173.644	173.605	173.566	173.528	173.49	173.453	173.416	173.379	173.343	173.308
15	176.343	175.972	175.712	175.476	175.258	175.056	174.89	174.742	174.602	174.468	174.339	174.215	174.096	173.983	173.889	173.797	173.707	173.62	173.535	173.452	173.371	173.292	173.214	173.138	173.063	172.991	172.929	172.868	172.807	172.748	172.69	172.632	172.576	172.52	172.465	172.41	172.357	172.304	172.252	172.2	172.149	172.099	172.049	172	171.957	171.914	171.872	171.83	171.789
20	175.763	175.37	175.022	174.761	174.523	174.302	174.094	173.913	173.755	173.603	173.458	173.318	173.183	173.053	172.936	172.829	172.726	172.625	172.527	172.431	172.337	172.245	172.155	172.067	171.983	171.908	171.835	171.762	171.691	171.621	171.553	171.485	171.418	171.352	171.287	171.223	171.16	171.098	171.036	170.978	170.924	170.871	170.819	170.767	170.715	170.664	170.614	170.564	170.515
25	175.259	174.809	174.454	174.131	173.86	173.626	173.406	173.197	172.999	172.835	172.677	172.526	172.379	172.238	172.101	171.971	171.857	171.745	171.637	171.531	171.427	171.326	171.226	171.129	171.034	170.946	170.864	170.783	170.703	170.625	170.548	170.472	170.397	170.324	170.251	170.179	170.108	170.039	169.972	169.911	169.85	169.789	169.73	169.671	169.613	169.555	169.498	169.441	169.386
30	174.799	174.316	173.906	173.578	173.277	172.996	172.767	172.55	172.344	172.146	171.962	171.801	171.646	171.496	171.351	171.209	171.072	170.945	170.828	170.714	170.602	170.493	170.387	170.282	170.179	170.079	169.982	169.894	169.807	169.722	169.638	169.555	169.474	169.394	169.315	169.237	169.16	169.084	169.009	168.94	168.873	168.807	168.742	168.677	168.613	168.55	168.487	168.425	168.364
35	174.386	173.849	173.428	173.045	172.734	172.449	172.182	171.937	171.724	171.521	171.326	171.138	170.962	170.805	170.652	170.505	170.361	170.221	170.085	169.957	169.839	169.723	169.61	169.5	169.391	169.285	169.18	169.077	168.978	168.887	168.798	168.71	168.623	168.537	168.453	168.369	168.287	168.206	168.126	168.047	167.971	167.9	167.83	167.76	167.691	167.623	167.556	167.489	167.423
40	173.977	173.431	172.956	172.577	172.228	171.914	171.644	171.388	171.145	170.921	170.722	170.529	170.344	170.165	169.992	169.839	169.69	169.545	169.404	169.266	169.131	168.999	168.881	168.766	168.652	168.541	168.431	168.324	168.218	168.114	168.012	167.918	167.826	167.736	167.647	167.559	167.473	167.387	167.303	167.219	167.137	167.056	166.977	166.903	166.83	166.758	166.686	166.616	166.545
45	173.627	173.013	172.541	172.114	171.754	171.431	171.127	170.856	170.61	170.376	170.151	169.941	169.752	169.569	169.392	169.219	169.052	168.899	168.753	168.611	168.473	168.337	168.204	168.074	167.95	167.835	167.721	167.61	167.5	167.392	167.286	167.181	167.078	166.979	166.886	166.794	166.703	166.614	166.526	166.439	166.353	166.268	166.184	166.101	166.019	165.941	165.866	165.792	165.718
50	173.278	172.649	172.126	171.692	171.307	170.953	170.65	170.364	170.091	169.846	169.62	169.402	169.192	168.99	168.809	168.634	168.464	168.298	168.137	167.981	167.839	167.7	167.563	167.43	167.299	167.171	167.045	166.926	166.813	166.702	166.593	166.485	166.378	166.274	166.17	166.069	165.97	165.878	165.786	165.696	165.606	165.518	165.431	165.345	165.26	165.175	165.092	165.009	164.932
55	172.937	172.286	171.744	171.283	170.874	170.52	170.187	169.883	169.612	169.352	169.103	168.875	168.663	168.459	168.26	168.068	167.89	167.722	167.558	167.398	167.242	167.089	166.943	166.807	166.673	166.542	166.413	166.287	166.162	166.04	165.925	165.814	165.705	165.597	165.491	165.387	165.284	165.182	165.081	164.983	164.891	164.8	164.71	164.621	164.533	164.446	164.359	164.274	164.19
60	172.634	171.932	171.377	170.888	170.473	170.086	169.749	169.437	169.141	168.87	168.621	168.382	168.151	167.933	167.734	167.54	167.352	167.168	166.99	166.828	166.67	166.515	166.363	166.215	166.069	165.931	165.8	165.671	165.544	165.419	165.297	165.176	165.057	164.943	164.834	164.727	164.622	164.517	164.414	164.313	164.212	164.113	164.015	163.922	163.832	163.742	163.654	163.566	163.479
65	172.33	171.611	171.01	170.521	170.072	169.686	169.329	168.992	168.698	168.417	168.148	167.897	167.667	167.443	167.227	167.018	166.827	166.642	166.463	166.287	166.116	165.951	165.798	165.647	165.5	165.355	165.213	165.074	164.94	164.813	164.689	164.566	164.445	164.325	164.208	164.092	163.979	163.872	163.767	163.663	163.561	163.459	163.359	163.26	163.162	163.065	162.971	162.881	162.792
70	172.026	171.29	170.68	170.155	169.702	169.293	168.916	168.584	168.267	167.967	167.7	167.442	167.194	166.957	166.741	166.531	166.327	166.129	165.939	165.763	165.59	165.422	165.256	165.094	164.94	164.793	164.65	164.509	164.37	164.233	164.099	163.969	163.846	163.725	163.605	163.488	163.371	163.257	163.143	163.032	162.925	162.822	162.72	162.619	162.519	162.42	162.322	162.226	162.13
75	171.755	170.973	170.351	169.808	169.338	168.908	168.532	168.175	167.849	167.55	167.263	166.988	166.741	166.502	166.271	166.046	165.839	165.64	165.447	165.258	165.073	164.899	164.732	164.57	164.41	164.253	164.099	163.951	163.811	163.673	163.538	163.404	163.272	163.143	163.015	162.895	162.777	162.661	162.546	162.432	162.32	162.21	162.1	161.992	161.891	161.79	161.691	161.592	161.495
80	171.487	170.685	170.022	169.476	168.977	168.549	168.147	167.785	167.451	167.133	166.839	166.566	166.303	166.048	165.814	165.59	165.373	165.161	164.957	164.768	164.583	164.402	164.224	164.051	163.887	163.73	163.575	163.423	163.274	163.127	162.983	162.848	162.715	162.584	162.455	162.328	162.202	162.078	161.958	161.843	161.73	161.618	161.507	161.397	161.289	161.182	161.076	160.972	160.873
85	171.218	170.398	169.722	169.144	168.644	168.19	167.781	167.409	167.054	166.736	166.434	166.144	165.873	165.62	165.375	165.137	164.912	164.701	164.495	164.293	164.097	163.91	163.733	163.559	163.388	163.221	163.056	162.901	162.75	162.603	162.457	162.314	162.173	162.034	161.902	161.773	161.647	161.521	161.398	161.276	161.155	161.036	160.922	160.812	160.702	160.593	160.486	160.38	160.275
90	170.955	170.11	169.424	168.827	168.311	167.843	167.427	167.032	166.681	166.348	166.029	165.74	165.463	165.196	164.94	164.704	164.474	164.25	164.032	163.83	163.633	163.442	163.254	163.07	162.895	162.727	162.563	162.401	162.242	162.085	161.935	161.791	161.649	161.509	161.371	161.235	161.101	160.97	160.846	160.722	160.601	160.481	160.362	160.245	160.129	160.014	159.904	159.797	159.691
95	170.715	169.84	169.126	168.523	167.98	167.512	167.072	166.68	166.312	165.963	165.649	165.346	165.054	164.785	164.528	164.279	164.036	163.812	163.595	163.383	163.176	162.975	162.787	162.603	162.423	162.246	162.072	161.906	161.747	161.59	161.436	161.284	161.134	160.987	160.848	160.712	160.577	160.444	160.312	160.182	160.054	159.93	159.811	159.692	159.575	159.459	159.345	159.231	159.119
100	170.474	169.579	168.842	168.219	167.673	167.181	166.738	166.331	165.947	165.602	165.27	164.955	164.666	164.387	164.116	163.862	163.622	163.387	163.159	162.939	162.733	162.531	162.334	162.14	161.953	161.776	161.603	161.432	161.264	161.099	160.939	160.787	160.637	160.489	160.343	160.199	160.057	159.921	159.788	159.658	159.529	159.401	159.275	159.151	159.028	158.91	158.794	158.68	158.567
105	170.233	169.318	168.569	167.922	167.367	166.86	166.408	165.982	165.603	165.24	164.899	164.585	164.282	163.989	163.722	163.462	163.209	162.965	162.738	162.517	162.3	162.088	161.887	161.694	161.505	161.319	161.137	160.959	160.792	160.627	160.464	160.304	160.146	159.991	159.845	159.701	159.558	159.418	159.279	159.142	159.006	158.878	158.751	158.626	158.502	158.379	158.258	158.138	158.019
110	169.994	169.058	168.297	167.642	167.06	166.552	166.079	165.656	165.258	164.886	164.544	164.215	163.903	163.614	163.333	163.061	162.807	162.564	162.326	162.094	161.874	161.663	161.457	161.255	161.056	160.868	160.686	160.508	160.332	160.159	159.989	159.829	159.671	159.516	159.362	159.211	159.062	158.918	158.779	158.642	158.506	158.371	158.239	158.107	157.979	157.855	157.733	157.613	157.493
115	169.775	168.814	168.024	167.361	166.771	166.244	165.766	165.329	164.919	164.546	164.189	163.854	163.541	163.238	162.948	162.679	162.417	162.162	161.918	161.688	161.462	161.242	161.027	160.824	160.627	160.433	160.243	160.056	159.878	159.705	159.535	159.368	159.203	159.04	158.885	158.734	158.584	158.437	158.291	158.147	158.005	157.87	157.737	157.605	157.475	157.346	157.219	157.093	156.969
120	169.557	168.576	167.77	167.081	166.486	165.941	165.459	165.003	164.596	164.207	163.843	163.505	163.179	162.87	162.581	162.3	162.027	161.773	161.527	161.286	161.051	160.83	160.616	160.406	160.2	159.998	159.808	159.622	159.439	159.258	159.081	158.91	158.745	158.583	158.423	158.265	158.109	157.957	157.811	157.667	157.525	157.384	157.245	157.108	156.973	156.843	156.715	156.589	156.463
125	169.339	168.337	167.518	166.815	166.201	165.654	165.152	164.697	164.273	163.875	163.509	163.156	162.826	162.515	162.214	161.925	161.655	161.392	161.135	160.89	160.657	160.429	160.206	159.988	159.783	159.582	159.384	159.19	158.999	158.82	158.643	158.468	158.297	158.128	157.962	157.804	157.648	157.495	157.343	157.193	157.044	156.902	156.763	156.625	156.489	156.354	156.221	156.089	155.959
130	169.121	168.099	167.267	166.555	165.922	165.366	164.854	164.39	163.952	163.555	163.174	162.818	162.483	162.16	161.854	161.565	161.284	161.011	160.756	160.508	160.266	160.028	159.805	159.588	159.375	159.166	158.962	158.769	158.579	158.392	158.208	158.027	157.854	157.685	157.519	157.354	157.192	157.032	156.879	156.729	156.581	156.434	156.289	156.146	156.004	155.869	155.735	155.603	155.472
135	168.911	167.871	167.015	166.294	165.656	165.079	164.565	164.084	163.648	163.235	162.848	162.488	162.141	161.815	161.505	161.205	160.918	160.647	160.383	160.126	159.88	159.644	159.414	159.188	158.968	158.76	158.556	158.355	158.158	157.965	157.782	157.601	157.423	157.248	157.075	156.908	156.746	156.586	156.429	156.273	156.119	155.968	155.823	155.679	155.537	155.397	155.258	155.121	154.985
140	168.712	167.651	166.78	166.034	165.39	164.804	164.277	163.791	163.343	162.92	162.532	162.158	161.808	161.477	161.157	160.853	160.565	160.284	160.01	159.755	159.505	159.262	159.023	158.798	158.578	158.362	158.15	157.945	157.748	157.555	157.365	157.177	156.993	156.818	156.645	156.475	156.307	156.142	155.979	155.823	155.669	155.517	155.366	155.218	155.071	154.928	154.789	154.651	154.515
145	168.512	167.431	166.547	165.789	165.124	164.535	163.989	163.502	163.038	162.617	162.215	161.837	161.483	161.14	160.817	160.51	160.212	159.925	159.654	159.39	159.131	158.884	158.647	158.415	158.187	157.965	157.755	157.548	157.344	157.144	156.949	156.763	156.579	156.397	156.219	156.042	155.873	155.708	155.544	155.383	155.224	155.066	154.913	154.765	154.617	154.472	154.328	154.185	154.044
150	168.313	167.211	166.313	165.546	164.867	164.265	163.717	163.213	162.748	162.314	161.904	161.524	161.157	160.812	160.485	160.168	159.865	159.578	159.298	159.024	158.768	158.517	158.272	158.032	157.805	157.583	157.365	157.151	156.943	156.744	156.548	156.355	156.164	155.978	155.799	155.624	155.45	155.279	155.11	154.945	154.786	154.628	154.473	154.319	154.167	154.016	153.871	153.729	153.588
155	168.113	166.992	166.08	165.303	164.617	163.996	163.445	162.929	162.46	162.012	161.603	161.211	160.84	160.491	160.153	159.833	159.528	159.231	158.944	158.674	158.409	158.151	157.902	157.664	157.43	157.201	156.977	156.764	156.554	156.349	156.146	155.948	155.759	155.572	155.388	155.206	155.027	154.856	154.687	154.52	154.356	154.193	154.032	153.877	153.725	153.575	153.426	153.278	153.132
160	167.92	166.788	165.856	165.06	164.367	163.742	163.174	162.655	162.172	161.724	161.303	160.902	160.53	160.17	159.829	159.505	159.191	158.889	158.603	158.324	158.051	157.793	157.542	157.296	157.055	156.825	156.602	156.382	156.166	155.955	155.754	155.555	155.36	155.167	154.978	154.796	154.618	154.441	154.267	154.095	153.928	153.765	153.605	153.446	153.289	153.134	152.981	152.833	152.687
165	167.736	166.584	165.638	164.828	164.118	163.488	162.907	162.382	161.889	161.436	161.002	160.604	160.22	159.855	159.512	159.178	158.86	158.557	158.262	157.975	157.705	157.441	157.182	156.931	156.692	156.458	156.227	156	155.786	155.575	155.367	155.162	154.962	154.77	154.58	154.394	154.209	154.027	153.853	153.681	153.512	153.344	153.179	153.015	152.857	152.702	152.549	152.397	152.246
170	167.552	166.379	165.42	164.6	163.876	163.234	162.65	162.109	161.615	161.149	160.716	160.306	159.914	159.549	159.194	158.857	158.537	158.225	157.925	157.64	157.361	157.089	156.829	156.578	156.332	156.09	155.858	155.633	155.411	155.194	154.98	154.777	154.576	154.378	154.183	153.991	153.807	153.626	153.447	153.27	153.096	152.925	152.76	152.596	152.435	152.275	152.117	151.961	151.811
175	167.368	166.175	165.202	164.372	163.641	162.981	162.393	161.844	161.342	160.868	160.429	160.007	159.618	159.242	158.882	158.544	158.214	157.898	157.597	157.304	157.018	156.747	156.483	156.225	155.972	155.732	155.496	155.265	155.037	154.819	154.606	154.397	154.19	153.987	153.793	153.601	153.412	153.225	153.041	152.864	152.689	152.517	152.347	152.179	152.012	151.852	151.694	151.537	151.382
180	167.184	165.973	164.985	164.144	163.405	162.74	162.135	161.585	161.068	160.594	160.143	159.722	159.322	158.938	158.579	158.23	157.896	157.579	157.27	156.97	156.686	156.409	156.137	155.876	155.624	155.377	155.135	154.9	154.674	154.452	154.233	154.017	153.811	153.608	153.408	153.211	153.017	152.83	152.647	152.465	152.286	152.109	151.936	151.768	151.602	151.437	151.275	151.114	150.956
185	167	165.782	164.78	163.92	163.17	162.5	161.884	161.326	160.804	160.321	159.863	159.437	159.026	158.644	158.275	157.92	157.586	157.26	156.945	156.647	156.355	156.07	155.799	155.535	155.277	155.023	154.782	154.545	154.313	154.084	153.863	153.649	153.438	153.229	153.024	152.827	152.633	152.442	152.253	152.067	151.886	151.71	151.535	151.362	151.191	151.022	150.859	150.699	150.539
190	166.829	165.592	164.575	163.706	162.939	162.259	161.64	161.066	160.544	160.047	159.59	159.152	158.741	158.35	157.972	157.619	157.276	156.944	156.63	156.324	156.025	155.742	155.465	155.194	154.931	154.68	154.433	154.19	153.953	153.725	153.502	153.281	153.064	152.855	152.651	152.449	152.25	152.054	151.864	151.678	151.495	151.313	151.134	150.958	150.787	150.619	150.452	150.287	150.123
195	166.658	165.401	164.371	163.491	162.716	162.019	161.396	160.816	160.283	159.783	159.316	158.873	158.458	158.056	157.681	157.318	156.967	156.637	156.315	156.001	155.705	155.415	155.132	154.859	154.596	154.337	154.084	153.84	153.603	153.37	153.14	152.917	152.701	152.488	152.278	152.071	151.871	151.676	151.483	151.292	151.103	150.92	150.741	150.564	150.389	150.216	150.044	149.878	149.715
200	166.487	165.21	164.166	163.276	162.493	161.79	161.152	160.569	160.022	159.522	159.043	158.6	158.174	157.772	157.389	157.017	156.669	156.33	156	155.69	155.386	155.089	154.805	154.53	154.26	153.995	153.743	153.496	153.253	153.014	152.785	152.56	152.339	152.121	151.909	151.703	151.499	151.299	151.101	150.908	150.72	150.534	150.351	150.169	149.99	149.818	149.647	149.477	149.31
205	166.317	165.02	163.963	163.061	162.271	161.561	160.912	160.322	159.772	159.261	158.779	158.327	157.895	157.49	157.098	156.727	156.371	156.024	155.697	155.378	155.067	154.771	154.483	154.201	153.927	153.664	153.406	153.152	152.906	152.669	152.435	152.204	151.978	151.761	151.547	151.336	151.128	150.924	150.727	150.532	150.34	150.149	149.962	149.781	149.602	149.425	149.25	149.077	148.907
210	166.146	164.839	163.77	162.854	162.048	161.333	160.679	160.075	159.523	158.999	158.518	158.054	157.623	157.208	156.813	156.438	156.073	155.727	155.393	155.067	154.757	154.456	154.161	153.876	153.602	153.333	153.068	152.815	152.567	152.324	152.084	151.853	151.627	151.405	151.186	150.97	150.763	150.558	150.356	150.156	149.96	149.771	149.583	149.398	149.214	149.033	148.857	148.684	148.513
215	165.976	164.661	163.578	162.651	161.835	161.105	160.447	159.836	159.274	158.749	158.256	157.79	157.351	156.929	156.533	156.148	155.783	155.432	155.09	154.764	154.449	154.141	153.844	153.558	153.277	153.001	152.739	152.482	152.228	151.98	151.742	151.507	151.276	151.049	150.829	150.614	150.402	150.192	149.985	149.787	149.59	149.396	149.204	149.014	148.831	148.65	148.471	148.293	148.118
220	165.817	164.482	163.385	162.447	161.623	160.882	160.214	159.6	159.025	158.498	157.994	157.528	157.079	156.658	156.252	155.864	155.495	155.136	154.794	154.464	154.141	153.831	153.532	153.239	152.954	152.68	152.412	152.148	151.893	151.645	151.401	151.162	150.927	150.701	150.478	150.258	150.04	149.831	149.624	149.421	149.22	149.021	148.829	148.64	148.453	148.267	148.084	147.905	147.73
225	165.657	164.303	163.192	162.244	161.412	160.665	159.982	159.364	158.786	158.248	157.743	157.266	156.814	156.386	155.973	155.585	155.208	154.846	154.5	154.163	153.838	153.526	153.221	152.923	152.639	152.359	152.085	151.821	151.564	151.31	151.061	150.821	150.586	150.355	150.126	149.904	149.688	149.474	149.263	149.055	148.853	148.655	148.459	148.266	148.074	147.888	147.705	147.524	147.345
230	165.498	164.124	162.999	162.041	161.201	160.448	159.76	159.128	158.548	157.998	157.492	157.004	156.552	156.115	155.703	155.306	154.923	154.561	154.207	153.867	153.541	153.221	152.912	152.615	152.324	152.038	151.765	151.498	151.235	150.976	150.729	150.485	150.245	150.008	149.781	149.557	149.336	149.118	148.905	148.697	148.493	148.29	148.09	147.895	147.704	147.515	147.328	147.143	146.96
235	165.338	163.948	162.816	161.845	160.99	160.23	159.538	158.897	158.309	157.758	157.24	156.752	156.29	155.849	155.432	155.027	154.646	154.275	153.917	153.576	153.243	152.919	152.61	152.307	152.009	151.726	151.448	151.174	150.908	150.651	150.398	150.149	149.907	149.671	149.439	149.21	148.985	148.767	148.553	148.341	148.132	147.927	147.727	147.53	147.335	147.142	146.952	146.767	146.584
240	165.179	163.779	162.634	161.652	160.789	160.013	159.316	158.671	158.071	157.517	156.989	156.5	156.029	155.588	155.162	154.757	154.368	153.99	153.633	153.285	152.946	152.624	152.308	151.998	151.703	151.414	151.13	150.855	150.588	150.326	150.068	149.818	149.574	149.334	149.097	148.867	148.642	148.42	148.201	147.985	147.776	147.57	147.366	147.165	146.966	146.774	146.583	146.395	146.208
245	165.019	163.611	162.451	161.459	160.587	159.805	159.094	158.445	157.839	157.277	156.748	156.248	155.775	155.326	154.895	154.487	154.091	153.714	153.35	152.994	152.658	152.328	152.006	151.699	151.398	151.103	150.818	150.541	150.269	150.001	149.744	149.491	149.242	148.997	148.761	148.529	148.299	148.073	147.853	147.637	147.424	147.214	147.006	146.805	146.606	146.409	146.215	146.022	145.835
250	164.868	163.442	162.269	161.266	160.386	159.597	158.877	158.219	157.61	157.037	156.506	155.997	155.523	155.065	154.634	154.218	153.819	153.438	153.066	152.713	152.369	152.033	151.712	151.399	151.092	150.797	150.509	150.227	149.95	149.684	149.422	149.164	148.913	148.669	148.428	148.191	147.958	147.732	147.509	147.29	147.072	146.861	146.653	146.448	146.246	146.045	145.85	145.658	145.467
255	164.719	163.274	162.086	161.073	160.185	159.389	158.664	157.994	157.381	156.804	156.264	155.754	155.271	154.81	154.373	153.95	153.551	153.162	152.789	152.431	152.08	151.745	151.419	151.1	150.793	150.494	150.201	149.915	149.639	149.368	149.101	148.842	148.589	148.34	148.095	147.856	147.623	147.393	147.166	146.943	146.727	146.513	146.301	146.092	145.888	145.687	145.489	145.293	145.099
260	164.569	163.105	161.909	160.886	159.984	159.182	158.451	157.777	157.153	156.573	156.022	155.511	155.018	154.557	154.112	153.689	153.282	152.889	152.515	152.149	151.798	151.458	151.126	150.806	150.496	150.191	149.895	149.609	149.328	149.051	148.784	148.523	148.266	148.012	147.767	147.527	147.289	147.054	146.827	146.603	146.383	146.164	145.95	145.741	145.535	145.331	145.129	144.931	144.737
265	164.419	162.94	161.735	160.702	159.792	158.975	158.239	157.56	156.927	156.342	155.788	155.268	154.774	154.305	153.855	153.429	153.014	152.622	152.24	151.871	151.517	151.172	150.838	150.515	150.199	149.892	149.595	149.303	149.017	148.741	148.471	148.204	147.943	147.691	147.442	147.197	146.956	146.722	146.491	146.264	146.039	145.82	145.605	145.393	145.183	144.975	144.774	144.574	144.377
270	164.27	162.78	161.562	160.518	159.6	158.776	158.026	157.343	156.706	156.11	155.555	155.025	154.53	154.052	153.603	153.168	152.753	152.354	151.966	151.597	151.237	150.888	150.553	150.224	149.905	149.597	149.294	148.998	148.713	148.433	148.157	147.889	147.628	147.371	147.117	146.87	146.629	146.391	146.156	145.926	145.701	145.48	145.261	145.044	144.834	144.626	144.421	144.218	144.017
275	164.12	162.621	161.389	160.334	159.408	158.577	157.821	157.126	156.486	155.884	155.322	154.79	154.286	153.806	153.35	152.91	152.493	152.086	151.699	151.324	150.958	150.609	150.268	149.935	149.616	149.302	148.994	148.699	148.41	148.124	147.847	147.578	147.312	147.05	146.797	146.548	146.302	146.06	145.825	145.593	145.365	145.139	144.918	144.702	144.489	144.277	144.068	143.864	143.663
280	163.972	162.461	161.215	160.15	159.216	158.379	157.616	156.913	156.266	155.661	155.089	154.555	154.043	153.562	153.097	152.658	152.233	151.824	151.433	151.05	150.686	150.331	149.984	149.652	149.327	149.007	148.702	148.401	148.106	147.82	147.541	147.267	146.996	146.736	146.479	146.226	145.976	145.735	145.497	145.261	145.029	144.803	144.581	144.361	144.143	143.93	143.721	143.515	143.31
285	163.831	162.302	161.042	159.968	159.023	158.18	157.412	156.704	156.046	155.438	154.861	154.321	153.806	153.318	152.85	152.405	151.973	151.564	151.166	150.783	150.414	150.052	149.706	149.369	149.038	148.72	148.409	148.103	147.808	147.519	147.235	146.957	146.688	146.423	146.161	145.906	145.657	145.411	145.169	144.931	144.699	144.47	144.243	144.02	143.802	143.588	143.375	143.165	142.958
290	163.69	162.142	160.875	159.792	158.838	157.982	157.208	156.496	155.832	155.215	154.636	154.086	153.57	153.073	152.605	152.152	151.721	151.305	150.902	150.517	150.141	149.779	149.429	149.085	148.755	148.433	148.116	147.81	147.512	147.218	146.931	146.653	146.38	146.11	145.847	145.591	145.337	145.087	144.844	144.605	144.369	144.136	143.908	143.685	143.464	143.246	143.03	142.819	142.612
295	163.549	161.983	160.71	159.617	158.654	157.791	157.004	156.287	155.62	154.992	154.411	153.856	153.334	152.834	152.36	151.903	151.468	151.045	150.643	150.251	149.872	149.508	149.152	148.807	148.473	148.146	147.828	147.519	147.216	146.919	146.632	146.35	146.071	145.801	145.536	145.275	145.018	144.769	144.523	144.28	144.04	143.807	143.577	143.35	143.126	142.906	142.69	142.477	142.265
300	163.407	161.832	160.545	159.441	158.47	157.6	156.807	156.079	155.408	154.777	154.186	153.629	153.098	152.597	152.115	151.657	151.216	150.791	150.384	149.986	149.607	149.237	148.878	148.531	148.192	147.862	147.542	147.229	146.922	146.625	146.333	146.046	145.768	145.495	145.226	144.961	144.705	144.452	144.202	143.956	143.717	143.48	143.247	143.016	142.792	142.57	142.351	142.134	141.92
305	163.266	161.681	160.38	159.265	158.286	157.409	156.611	155.875	155.196	154.562	153.962	153.402	152.867	152.361	151.874	151.412	150.964	150.539	150.124	149.727	149.342	148.967	148.607	148.255	147.912	147.582	147.257	146.939	146.633	146.331	146.034	145.748	145.466	145.189	144.917	144.653	144.392	144.135	143.883	143.637	143.394	143.154	142.918	142.688	142.46	142.235	142.012	141.795	141.58
310	163.125	161.529	160.215	159.09	158.102	157.218	156.414	155.674	154.984	154.347	153.744	153.175	152.638	152.124	151.637	151.167	150.719	150.287	149.869	149.468	149.077	148.702	148.337	147.98	147.637	147.301	146.972	146.655	146.344	146.037	145.741	145.451	145.165	144.885	144.613	144.344	144.079	143.821	143.568	143.318	143.071	142.83	142.594	142.36	142.128	141.901	141.678	141.458	141.24
315	162.985	161.378	160.05	158.918	157.921	157.027	156.218	155.473	154.779	154.132	153.527	152.95	152.41	151.89	151.399	150.924	150.473	150.034	149.616	149.21	148.817	148.438	148.067	147.71	147.363	147.021	146.693	146.371	146.054	145.749	145.449	145.154	144.866	144.585	144.309	144.036	143.771	143.511	143.253	142.999	142.753	142.51	142.269	142.032	141.8	141.571	141.345	141.122	140.902
320	162.852	161.226	159.89	158.749	157.745	156.843	156.021	155.272	154.574	153.919	153.309	152.73	152.181	151.661	151.161	150.686	150.228	149.787	149.364	148.952	148.559	148.174	147.802	147.441	147.088	146.747	146.414	146.087	145.771	145.461	145.157	144.86	144.571	144.286	144.004	143.733	143.465	143.2	142.94	142.687	142.437	142.189	141.946	141.709	141.474	141.242	141.012	140.789	140.568
325	162.718	161.075	159.732	158.581	157.568	156.659	155.831	155.07	154.369	153.711	153.091	152.51	151.954	151.431	150.926	150.447	149.983	149.542	149.112	148.7	148.3	147.911	147.538	147.172	146.817	146.473	146.135	145.807	145.488	145.174	144.867	144.569	144.275	143.986	143.706	143.43	143.158	142.891	142.631	142.374	142.12	141.871	141.628	141.387	141.148	140.914	140.685	140.458	140.233
330	162.585	160.927	159.574	158.413	157.391	156.475	155.642	154.874	154.164	153.503	152.877	152.29	151.732	151.201	150.695	150.209	149.744	149.296	148.863	148.448	148.042	147.654	147.274	146.905	146.549	146.199	145.859	145.529	145.205	144.888	144.581	144.278	143.98	143.692	143.408	143.128	142.854	142.587	142.322	142.061	141.807	141.557	141.309	141.065	140.826	140.59	140.358	140.127	139.901
335	162.451	160.783	159.417	158.245	157.215	156.292	155.452	154.68	153.961	153.294	152.666	152.07	151.511	150.972	150.464	149.972	149.505	149.05	148.617	148.196	147.789	147.396	147.011	146.642	146.28	145.927	145.586	145.252	144.924	144.607	144.295	143.988	143.691	143.399	143.11	142.829	142.554	142.282	142.014	141.753	141.496	141.242	140.991	140.747	140.505	140.267	140.03	139.8	139.572
340	162.318	160.638	159.259	158.077	157.038	156.108	155.263	154.485	153.762	153.086	152.455	151.855	151.289	150.749	150.233	149.74	149.266	148.81	148.371	147.945	147.537	147.138	146.753	146.379	146.012	145.659	145.314	144.974	144.647	144.325	144.009	143.703	143.402	143.105	142.816	142.532	142.253	141.978	141.71	141.446	141.185	140.929	140.678	140.43	140.185	139.944	139.708	139.474	139.243
345	162.184	160.494	159.102	157.912	156.866	155.927	155.074	154.291	153.564	152.882	152.244	151.642	151.067	150.525	150.002	149.508	149.027	148.57	148.126	147.699	147.285	146.883	146.495	146.116	145.749	145.392	145.041	144.702	144.37	144.044	143.728	143.418	143.112	142.815	142.523	142.236	141.953	141.678	141.407	141.139	140.876	140.619	140.365	140.114	139.867	139.625	139.386	139.149	138.916
350	162.051	160.35	158.946	157.751	156.696	155.75	154.888	154.097	153.366	152.68	152.033	151.428	150.85	150.302	149.777	149.276	148.794	148.331	147.883	147.453	147.033	146.631	146.238	145.856	145.486	145.124	144.773	144.43	144.094	143.767	143.447	143.133	142.826	142.526	142.231	141.94	141.658	141.379	141.104	140.835	140.571	140.31	140.052	139.8	139.552	139.307	139.064	138.826	138.592
355	161.921	160.206	158.795	157.589	156.527	155.573	154.705	153.906	153.167	152.478	151.827	151.215	150.634	150.079	149.553	149.044	148.561	148.091	147.643	147.207	146.786	146.379	145.98	145.598	145.224	144.859	144.506	144.158	143.82	143.491	143.167	142.851	142.542	142.238	141.94	141.649	141.363	141.08	140.804	140.533	140.265	140.001	139.743	139.489	139.237	138.989	138.746	138.506	138.269
360	161.795	160.061	158.644	157.428	156.357	155.396	154.523	153.718	152.97	152.276	151.623	151.001	150.419	149.859	149.328	148.817	148.328	147.856	147.403	146.962	146.54	146.127	145.729	145.341	144.962	144.597	144.239	143.889	143.549	143.215	142.889	142.571	142.258	141.951	141.652	141.358	141.068	140.785	140.506	140.231	139.961	139.697	139.436	139.178	138.924	138.675	138.429	138.186	137.946
365	161.668	159.921	158.493	157.266	156.187	155.219	154.34	153.53	152.778	152.075	151.418	150.794	150.203	149.642	149.103	148.591	148.095	147.622	147.163	146.721	146.293	145.877	145.477	145.084	144.705	144.335	143.972	143.622	143.278	142.94	142.613	142.292	141.975	141.668	141.365	141.067	140.776	140.49	140.208	139.931	139.66	139.392	139.128	138.868	138.614	138.362	138.112	137.868	137.627
370	161.541	159.783	158.342	157.105	156.017	155.042	154.157	153.342	152.586	151.877	151.213	150.586	149.988	149.424	148.881	148.365	147.866	147.388	146.925	146.481	146.047	145.631	145.225	144.83	144.448	144.073	143.71	143.355	143.007	142.67	142.338	142.012	141.696	141.385	141.078	140.779	140.486	140.196	139.912	139.634	139.359	139.088	138.823	138.562	138.304	138.048	137.798	137.552	137.308
375	161.414	159.645	158.191	156.946	155.852	154.87	153.975	153.155	152.394	151.681	151.008	150.379	149.778	149.207	148.662	148.139	147.638	147.155	146.69	146.24	145.805	145.385	144.973	144.578	144.191	143.814	143.448	143.089	142.74	142.399	142.063	141.737	141.417	141.102	140.795	140.493	140.196	139.904	139.619	139.337	139.059	138.787	138.52	138.255	137.994	137.738	137.486	137.236	136.989
380	161.288	159.507	158.04	156.79	155.688	154.699	153.798	152.968	152.202	151.485	150.809	150.171	149.568	148.99	148.443	147.915	147.411	146.923	146.456	146	145.564	145.138	144.727	144.326	143.935	143.558	143.187	142.826	142.474	142.128	141.792	141.463	141.139	140.822	140.513	140.207	139.907	139.615	139.326	139.04	138.762	138.488	138.217	137.949	137.688	137.43	137.174	136.922	136.675
385	161.161	159.37	157.894	156.635	155.524	154.528	153.621	152.786	152.009	151.289	150.61	149.965	149.359	148.778	148.224	147.694	147.184	146.695	146.222	145.765	145.324	144.894	144.48	144.075	143.683	143.301	142.926	142.564	142.208	141.86	141.522	141.188	140.862	140.544	140.23	139.922	139.622	139.325	139.033	138.747	138.466	138.188	137.915	137.647	137.383	137.121	136.863	136.611	136.36
390	161.034	159.232	157.749	156.48	155.361	154.357	153.444	152.604	151.823	151.093	150.411	149.763	149.149	148.566	148.005	147.474	146.958	146.466	145.987	145.53	145.083	144.653	144.234	143.826	143.431	143.044	142.67	142.303	141.943	141.595	141.252	140.915	140.588	140.266	139.949	139.641	139.336	139.036	138.744	138.455	138.17	137.891	137.616	137.345	137.077	136.814	136.556	136.299	136.046
395	160.912	159.094	157.604	156.324	155.197	154.186	153.267	152.422	151.636	150.9	150.212	149.561	148.941	148.354	147.791	147.253	146.736	146.238	145.758	145.295	144.845	144.412	143.987	143.579	143.179	142.791	142.413	142.041	141.682	141.329	140.982	140.646	140.314	139.988	139.671	139.359	139.051	138.751	138.455	138.163	137.876	137.595	137.318	137.043	136.775	136.51	136.248	135.988	135.735
400	160.791	158.958	157.459	156.169	155.033	154.015	153.09	152.24	151.45	150.71	150.013	149.359	148.736	148.142	147.578	147.033	146.514	146.01	145.529	145.06	144.61	144.17	143.746	143.333	142.929	142.539	142.156	141.784	141.42	141.063	140.716	140.376	140.04	139.715	139.394	139.078	138.769	138.466	138.167	137.873	137.585	137.3	137.019	136.745	136.473	136.205	135.94	135.681	135.425
405	160.67	158.826	157.314	156.014	154.874	153.849	152.916	152.057	151.263	150.52	149.819	149.157	148.532	147.932	147.364	146.816	146.292	145.787	145.3	144.828	144.374	143.931	143.504	143.086	142.682	142.287	141.901	141.527	141.159	140.801	140.451	140.106	139.77	139.441	139.116	138.799	138.488	138.181	137.88	137.585	137.293	137.005	136.724	136.447	136.172	135.902	135.637	135.374	135.114
410	160.55	158.694	157.169	155.863	154.715	153.684	152.744	151.879	151.077	150.329	149.625	148.957	148.327	147.726	147.15	146.601	146.07	145.563	145.071	144.598	144.138	143.694	143.262	142.842	142.435	142.035	141.649	141.27	140.9	140.54	140.185	139.839	139.501	139.167	138.841	138.522	138.207	137.898	137.596	137.297	137.002	136.714	136.43	136.149	135.873	135.601	135.333	135.067	134.806
415	160.429	158.562	157.024	155.714	154.557	153.518	152.573	151.702	150.893	150.139	149.431	148.76	148.123	147.519	146.938	146.385	145.852	145.34	144.845	144.368	143.904	143.458	143.02	142.6	142.187	141.787	141.397	141.013	140.643	140.278	139.921	139.573	139.231	138.895	138.568	138.245	137.927	137.617	137.311	137.009	136.714	136.423	136.136	135.853	135.575	135.301	135.029	134.763	134.5
420	160.308	158.43	156.884	155.564	154.399	153.353	152.401	151.526	150.712	149.95	149.237	148.563	147.92	147.312	146.729	146.17	145.635	145.117	144.62	144.138	143.673	143.221	142.783	142.358	141.941	141.539	141.145	140.761	140.386	140.017	139.66	139.308	138.962	138.626	138.295	137.968	137.65	137.337	137.027	136.725	136.427	136.132	135.843	135.559	135.278	135	134.728	134.46	134.193
425	160.187	158.298	156.745	155.414	154.241	153.188	152.23	151.349	150.531	149.765	149.044	148.366	147.721	147.105	146.52	145.956	145.418	144.896	144.396	143.91	143.442	142.985	142.546	142.115	141.699	141.292	140.894	140.508	140.129	139.76	139.399	139.043	138.697	138.357	138.021	137.695	137.374	137.056	136.746	136.441	136.139	135.843	135.553	135.265	134.981	134.703	134.428	134.156	133.888
430	160.067	158.166	156.605	155.265	154.082	153.022	152.058	151.172	150.35	149.58	148.854	148.17	147.521	146.901	146.311	145.745	145.201	144.678	144.172	143.684	143.211	142.753	142.309	141.876	141.456	141.045	140.646	140.256	139.874	139.503	139.137	138.781	138.432	138.088	137.752	137.422	137.097	136.779	136.466	136.157	135.854	135.556	135.262	134.972	134.687	134.406	134.128	133.855	133.585
435	159.948	158.034	156.466	155.115	153.927	152.861	151.89	150.996	150.168	149.394	148.665	147.973	147.322	146.699	146.103	145.534	144.984	144.459	143.948	143.459	142.98	142.521	142.072	141.638	141.213	140.801	140.399	140.004	139.622	139.246	138.878	138.52	138.166	137.821	137.483	137.149	136.822	136.502	136.186	135.875	135.57	135.269	134.972	134.681	134.394	134.109	133.83	133.555	133.283
440	159.833	157.906	156.326	154.966	153.774	152.701	151.724	150.824	149.987	149.209	148.476	147.781	147.122	146.497	145.896	145.323	144.771	144.24	143.728	143.233	142.754	142.289	141.838	141.4	140.971	140.557	140.151	139.755	139.369	138.989	138.621	138.258	137.903	137.556	137.213	136.878	136.549	136.225	135.907	135.595	135.287	134.982	134.685	134.391	134.1	133.815	133.534	133.255	132.98
445	159.718	157.78	156.187	154.822	153.62	152.541	151.558	150.652	149.811	149.024	148.287	147.589	146.925	146.295	145.692	145.113	144.559	144.022	143.508	143.007	142.527	142.057	141.605	141.162	140.733	140.314	139.905	139.507	139.117	138.736	138.364	137.997	137.641	137.29	136.945	136.608	136.276	135.949	135.63	135.314	135.003	134.699	134.398	134.101	133.809	133.521	133.237	132.956	132.68
450	159.602	157.653	156.048	154.677	153.467	152.381	151.391	150.48	149.635	148.843	148.098	147.397	146.73	146.093	145.488	144.904	144.346	143.807	143.288	142.786	142.3	141.829	141.372	140.926	140.494	140.071	139.661	139.259	138.866	138.483	138.107	137.74	137.38	137.025	136.679	136.339	136.003	135.676	135.353	135.034	134.723	134.415	134.111	133.813	133.519	133.228	132.941	132.66	132.381
455	159.487	157.526	155.911	154.533	153.314	152.22	151.225	150.309	149.458	148.662	147.912	147.206	146.535	145.894	145.284	144.698	144.134	143.593	143.069	142.565	142.074	141.601	141.139	140.692	140.256	139.831	139.417	139.011	138.617	138.23	137.852	137.482	137.118	136.763	136.414	136.07	135.734	135.403	135.077	134.757	134.442	134.131	133.826	133.526	133.229	132.935	132.648	132.363	132.081
460	159.372	157.4	155.777	154.388	153.161	152.06	151.058	150.137	149.282	148.482	147.728	147.014	146.34	145.696	145.079	144.491	143.923	143.379	142.852	142.344	141.85	141.373	140.908	140.458	140.017	139.591	139.173	138.766	138.369	137.978	137.598	137.225	136.859	136.501	136.148	135.803	135.465	135.13	134.803	134.48	134.162	133.85	133.543	133.239	132.939	132.645	132.354	132.067	131.784
465	159.257	157.273	155.643	154.243	153.008	151.903	150.895	149.966	149.105	148.301	147.543	146.826	146.145	145.499	144.878	144.285	143.715	143.165	142.636	142.122	141.627	141.145	140.679	140.225	139.782	139.352	138.931	138.522	138.12	137.729	137.345	136.968	136.601	136.24	135.885	135.538	135.195	134.859	134.529	134.204	133.884	133.569	133.259	132.952	132.652	132.355	132.061	131.773	131.488
470	159.141	157.146	155.508	154.099	152.86	151.747	150.733	149.799	148.931	148.12	147.359	146.638	145.952	145.301	144.678	144.079	143.507	142.952	142.42	141.903	141.405	140.919	140.45	139.991	139.548	139.113	138.691	138.278	137.873	137.479	137.092	136.714	136.343	135.978	135.623	135.272	134.927	134.589	134.256	133.928	133.607	133.289	132.976	132.669	132.365	132.065	131.77	131.479	131.191
475	159.026	157.02	155.374	153.956	152.711	151.592	150.571	149.632	148.759	147.941	147.175	146.451	145.761	145.104	144.478	143.875	143.298	142.742	142.204	141.686	141.182	140.695	140.222	139.761	139.313	138.876	138.451	138.033	137.628	137.23	136.841	136.46	136.086	135.72	135.361	135.006	134.661	134.32	133.983	133.654	133.33	133.009	132.695	132.385	132.078	131.777	131.48	131.186	130.896
480	158.914	156.897	155.24	153.816	152.563	151.436	150.41	149.465	148.587	147.765	146.991	146.263	145.57	144.908	144.278	143.673	143.09	142.532	141.989	141.468	140.96	140.471	139.993	139.531	139.079	138.64	138.211	137.792	137.383	136.981	136.591	136.206	135.83	135.462	135.099	134.744	134.394	134.05	133.713	133.381	133.053	132.732	132.415	132.101	131.793	131.49	131.19	130.893	130.602
485	158.804	156.775	155.105	153.676	152.414	151.281	150.248	149.298	148.415	147.589	146.811	146.075	145.38	144.715	144.078	143.471	142.884	142.321	141.777	141.251	140.742	140.248	139.768	139.301	138.847	138.405	137.971	137.551	137.138	136.735	136.341	135.953	135.576	135.204	134.839	134.481	134.128	133.783	133.443	133.108	132.779	132.455	132.134	131.819	131.509	131.203	130.9	130.603	130.308
490	158.694	156.653	154.972	153.536	152.266	151.125	150.086	149.13	148.243	147.413	146.631	145.89	145.189	144.521	143.881	143.269	142.68	142.111	141.565	141.034	140.523	140.024	139.543	139.072	138.616	138.169	137.735	137.31	136.895	136.49	136.091	135.703	135.321	134.946	134.58	134.219	133.864	133.516	133.173	132.836	132.505	132.177	131.855	131.539	131.225	130.916	130.613	130.312	130.015
495	158.583	156.532	154.842	153.396	152.118	150.97	149.926	148.964	148.071	147.237	146.451	145.707	144.999	144.328	143.685	143.066	142.476	141.903	141.353	140.82	140.304	139.803	139.318	138.844	138.385	137.935	137.498	137.07	136.653	136.244	135.843	135.452	135.067	134.691	134.321	133.957	133.601	133.25	132.904	132.566	132.231	131.901	131.578	131.258	130.942	130.632	130.325	130.022	129.724
500	158.473	156.41	154.712	153.256	151.97	150.819	149.769	148.801	147.902	147.061	146.271	145.524	144.812	144.135	143.489	142.867	142.271	141.697	141.141	140.606	140.086	139.583	139.093	138.618	138.154	137.703	137.262	136.831	136.411	135.998	135.597	135.202	134.815	134.436	134.062	133.697	133.338	132.984	132.637	132.295	131.957	131.627	131.3	130.977	130.661	130.348	130.038	129.734	129.433
505	158.362	156.288	154.582	153.116	151.826	150.668	149.612	148.638	147.734	146.887	146.091	145.34	144.626	143.943	143.293	142.669	142.067	141.491	140.931	140.393	139.869	139.363	138.87	138.392	137.924	137.471	137.025	136.594	136.17	135.756	135.35	134.952	134.564	134.181	133.806	133.438	133.075	132.72	132.37	132.025	131.686	131.353	131.023	130.699	130.379	130.063	129.753	129.446	129.142
510	158.252	156.166	154.453	152.977	151.682	150.517	149.454	148.476	147.566	146.715	145.913	145.157	144.439	143.753	143.097	142.47	141.865	141.284	140.723	140.179	139.654	139.143	138.648	138.165	137.696	137.239	136.792	136.356	135.929	135.513	135.104	134.705	134.312	133.927	133.55	133.179	132.814	132.456	132.103	131.757	131.415	131.078	130.747	130.421	130.098	129.781	129.468	129.158	128.852
515	158.142	156.044	154.323	152.842	151.538	150.366	149.297	148.313	147.398	146.543	145.737	144.974	144.252	143.564	142.903	142.272	141.665	141.078	140.514	139.966	139.439	138.924	138.426	137.94	137.469	137.007	136.559	136.119	135.691	135.271	134.859	134.457	134.061	133.675	133.294	132.92	132.554	132.193	131.838	131.489	131.144	130.806	130.473	130.143	129.819	129.499	129.183	128.871	128.564
520	158.031	155.925	154.193	152.706	151.394	150.214	149.139	148.15	147.231	146.371	145.561	144.794	144.066	143.374	142.711	142.074	141.464	140.874	140.306	139.756	139.224	138.707	138.205	137.717	137.241	136.778	136.326	135.883	135.452	135.028	134.616	134.21	133.812	133.423	133.039	132.664	132.294	131.93	131.574	131.221	130.875	130.534	130.198	129.866	129.54	129.217	128.899	128.585	128.275
525	157.924	155.808	154.063	152.57	151.25	150.063	148.982	147.987	147.063	146.199	145.385	144.615	143.882	143.185	142.519	141.878	141.263	140.671	140.098	139.546	139.008	138.49	137.984	137.494	137.014	136.549	136.092	135.649	135.214	134.788	134.372	133.963	133.564	133.171	132.785	132.407	132.034	131.669	131.309	130.954	130.606	130.263	129.923	129.59	129.261	128.936	128.616	128.3	127.987
530	157.818	155.69	153.936	152.435	151.106	149.914	148.829	147.828	146.898	146.027	145.209	144.435	143.699	142.995	142.326	141.683	141.063	140.468	139.892	139.336	138.796	138.274	137.765	137.271	136.789	136.32	135.861	135.414	134.975	134.549	134.129	133.718	133.316	132.92	132.533	132.151	131.776	131.408	131.045	130.689	130.338	129.991	129.651	129.315	128.983	128.656	128.334	128.014	127.7
535	157.712	155.573	153.81	152.299	150.964	149.767	148.676	147.669	146.734	145.858	145.033	144.256	143.516	142.809	142.134	141.488	140.865	140.266	139.687	139.126	138.585	138.057	137.547	137.048	136.565	136.091	135.631	135.18	134.74	134.309	133.887	133.474	133.067	132.67	132.28	131.895	131.519	131.148	130.783	130.424	130.07	129.722	129.379	129.039	128.706	128.377	128.051	127.731	127.414
540	157.606	155.455	153.685	152.164	150.824	149.62	148.522	147.51	146.57	145.689	144.86	144.076	143.333	142.623	141.943	141.293	140.667	140.063	139.482	138.917	138.373	137.842	137.329	136.827	136.34	135.864	135.401	134.947	134.505	134.07	133.646	133.229	132.821	132.421	132.027	131.642	131.262	130.888	130.521	130.159	129.803	129.453	129.106	128.766	128.43	128.097	127.77	127.447	127.128
545	157.5	155.338	153.559	152.028	150.684	149.473	148.369	147.351	146.406	145.521	144.688	143.898	143.15	142.438	141.754	141.099	140.47	139.863	139.277	138.711	138.161	137.629	137.11	136.608	136.116	135.638	135.171	134.715	134.269	133.832	133.405	132.985	132.576	132.172	131.776	131.388	131.004	130.629	130.259	129.895	129.537	129.183	128.835	128.492	128.153	127.819	127.49	127.164	126.843
550	157.394	155.22	153.433	151.896	150.544	149.326	148.215	147.192	146.242	145.353	144.515	143.722	142.968	142.252	141.566	140.906	140.273	139.663	139.073	138.504	137.95	137.415	136.893	136.388	135.893	135.413	134.942	134.484	134.034	133.595	133.165	132.743	132.33	131.923	131.526	131.134	130.749	130.371	129.998	129.632	129.271	128.915	128.565	128.219	127.878	127.542	127.21	126.882	126.558
555	157.288	155.103	153.308	151.764	150.404	149.179	148.062	147.033	146.078	145.185	144.343	143.546	142.789	142.066	141.377	140.714	140.076	139.464	138.87	138.297	137.741	137.202	136.678	136.168	135.672	135.187	134.714	134.252	133.8	133.359	132.925	132.502	132.084	131.677	131.276	130.881	130.494	130.113	129.738	129.369	129.005	128.648	128.295	127.946	127.604	127.265	126.93	126.6	126.274
560	157.182	154.986	153.182	151.633	150.264	149.032	147.911	146.877	145.916	145.016	144.171	143.37	142.609	141.882	141.188	140.523	139.881	139.264	138.668	138.09	137.533	136.988	136.463	135.949	135.45	134.962	134.487	134.021	133.568	133.122	132.687	132.26	131.841	131.43	131.025	130.63	130.24	129.856	129.479	129.107	128.741	128.381	128.025	127.675	127.329	126.987	126.652	126.319	125.99
565	157.076	154.873	153.057	151.501	150.124	148.887	147.761	146.722	145.756	144.851	143.999	143.194	142.43	141.7	140.999	140.331	139.687	139.065	138.467	137.885	137.324	136.778	136.248	135.732	135.229	134.739	134.26	133.792	133.335	132.887	132.449	132.018	131.598	131.183	130.777	130.378	129.985	129.6	129.22	128.845	128.478	128.114	127.756	127.404	127.055	126.712	126.373	126.038	125.708
570	156.971	154.759	152.933	151.37	149.984	148.744	147.611	146.567	145.596	144.686	143.83	143.018	142.25	141.517	140.814	140.14	139.493	138.868	138.265	137.682	137.115	136.567	136.032	135.515	135.007	134.516	134.033	133.563	133.102	132.653	132.211	131.779	131.355	130.937	130.529	130.127	129.732	129.344	128.961	128.585	128.214	127.848	127.488	127.133	126.782	126.437	126.095	125.758	125.425
575	156.869	154.646	152.812	151.238	149.848	148.601	147.462	146.412	145.435	144.522	143.661	142.845	142.071	141.334	140.628	139.949	139.299	138.671	138.063	137.478	136.908	136.357	135.819	135.298	134.789	134.293	133.808	133.335	132.871	132.418	131.973	131.539	131.112	130.693	130.281	129.877	129.48	129.088	128.703	128.324	127.95	127.583	127.22	126.862	126.51	126.161	125.818	125.478	125.143
580	156.767	154.532	152.69	151.106	149.712	148.457	147.312	146.256	145.275	144.357	143.492	142.673	141.894	141.152	140.443	139.761	139.105	138.475	137.864	137.274	136.702	136.146	135.607	135.081	134.57	134.07	133.583	133.106	132.641	132.184	131.738	131.3	130.87	130.449	130.034	129.627	129.227	128.833	128.446	128.064	127.689	127.318	126.953	126.593	126.238	125.887	125.541	125.199	124.861
585	156.665	154.419	152.568	150.976	149.576	148.314	147.162	146.101	145.115	144.192	143.323	142.5	141.718	140.97	140.257	139.573	138.913	138.279	137.665	137.07	136.496	135.936	135.395	134.865	134.351	133.848	133.359	132.879	132.411	131.951	131.502	131.061	130.629	130.204	129.788	129.378	128.975	128.579	128.189	127.805	127.427	127.053	126.686	126.324	125.966	125.613	125.265	124.92	124.58
590	156.563	154.305	152.447	150.848	149.44	148.17	147.013	145.947	144.956	144.027	143.154	142.328	141.541	140.791	140.072	139.385	138.722	138.082	137.467	136.868	136.29	135.729	135.182	134.651	134.132	133.628	133.134	132.652	132.18	131.719	131.267	130.823	130.389	129.961	129.542	129.129	128.724	128.325	127.932	127.546	127.165	126.79	126.42	126.055	125.695	125.34	124.988	124.642	124.3
595	156.461	154.192	152.325	150.72	149.303	148.027	146.866	145.795	144.799	143.865	142.986	142.155	141.365	140.611	139.888	139.196	138.531	137.888	137.268	136.668	136.085	135.521	134.97	134.437	133.915	133.408	132.91	132.426	131.951	131.487	131.031	130.586	130.148	129.718	129.296	128.881	128.474	128.072	127.677	127.288	126.904	126.527	126.154	125.787	125.425	125.066	124.713	124.364	124.019
600	156.359	154.079	152.203	150.592	149.167	147.886	146.72	145.643	144.642	143.704	142.82	141.983	141.189	140.432	139.706	139.008	138.34	137.694	137.069	136.467	135.88	135.313	134.76	134.223	133.699	133.187	132.688	132.2	131.723	131.256	130.798	130.349	129.908	129.476	129.051	128.634	128.223	127.819	127.422	127.03	126.644	126.264	125.889	125.519	125.154	124.794	124.438	124.086	123.74
605	156.257	153.966	152.082	150.464	149.031	147.747	146.574	145.491	144.485	143.542	142.654	141.813	141.013	140.252	139.524	138.823	138.149	137.501	136.872	136.266	135.677	135.105	134.55	134.008	133.483	132.967	132.466	131.974	131.495	131.024	130.564	130.112	129.67	129.234	128.807	128.387	127.973	127.567	127.167	126.773	126.385	126.001	125.624	125.252	124.884	124.522	124.163	123.81	123.46
610	156.156	153.856	151.961	150.336	148.897	147.607	146.427	145.34	144.328	143.381	142.489	141.644	140.84	140.073	139.341	138.637	137.959	137.307	136.677	136.065	135.474	134.899	134.341	133.796	133.266	132.749	132.244	131.75	131.267	130.794	130.331	129.876	129.431	128.992	128.563	128.14	127.724	127.315	126.912	126.516	126.125	125.74	125.36	124.984	124.615	124.25	123.889	123.533	123.181
615	156.054	153.747	151.843	150.208	148.765	147.467	146.281	145.188	144.171	143.219	142.323	141.474	140.667	139.895	139.159	138.452	137.771	137.114	136.481	135.866	135.271	134.693	134.131	133.585	133.05	132.531	132.022	131.527	131.04	130.565	130.098	129.641	129.193	128.752	128.32	127.894	127.476	127.063	126.659	126.259	125.866	125.478	125.095	124.718	124.346	123.978	123.616	123.257	122.902
620	155.953	153.637	151.725	150.08	148.632	147.327	146.135	145.036	144.014	143.058	142.157	141.305	140.494	139.719	138.977	138.267	137.583	136.921	136.285	135.668	135.068	134.488	133.922	133.373	132.836	132.313	131.802	131.303	130.814	130.335	129.866	129.407	128.954	128.512	128.076	127.648	127.227	126.813	126.405	126.003	125.608	125.217	124.832	124.453	124.077	123.708	123.342	122.981	122.624
625	155.855	153.527	151.607	149.954	148.499	147.187	145.989	144.886	143.86	142.898	141.992	141.135	140.32	139.542	138.797	138.081	137.395	136.731	136.089	135.469	134.867	134.283	133.715	133.161	132.622	132.095	131.582	131.079	130.588	130.106	129.635	129.172	128.718	128.272	127.834	127.403	126.979	126.563	126.152	125.748	125.349	124.956	124.569	124.187	123.809	123.437	123.069	122.706	122.346
630	155.757	153.418	151.489	149.829	148.367	147.047	145.846	144.738	143.706	142.74	141.829	140.966	140.147	139.366	138.617	137.898	137.206	136.54	135.894	135.271	134.666	134.078	133.507	132.95	132.409	131.879	131.362	130.857	130.363	129.878	129.404	128.937	128.481	128.032	127.592	127.158	126.732	126.313	125.899	125.493	125.091	124.696	124.306	123.921	123.542	123.167	122.796	122.43	122.068
635	155.659	153.308	151.371	149.705	148.234	146.909	145.703	144.589	143.553	142.582	141.666	140.8	139.975	139.19	138.438	137.715	137.018	136.349	135.701	135.073	134.466	133.874	133.3	132.74	132.195	131.663	131.143	130.635	130.137	129.65	129.173	128.705	128.245	127.793	127.35	126.914	126.485	126.063	125.647	125.238	124.834	124.436	124.043	123.657	123.274	122.897	122.524	122.155	121.791
640	155.56	153.198	151.253	149.58	148.101	146.772	145.56	144.44	143.399	142.423	141.504	140.633	139.804	139.013	138.258	137.532	136.833	136.159	135.508	134.876	134.265	133.671	133.093	132.531	131.981	131.447	130.924	130.413	129.912	129.423	128.942	128.472	128.008	127.555	127.109	126.67	126.239	125.814	125.396	124.983	124.577	124.177	123.782	123.392	123.007	122.627	122.252	121.881	121.515
645	155.462	153.088	151.135	149.456	147.969	146.636	145.417	144.292	143.245	142.265	141.341	140.466	139.634	138.839	138.078	137.35	136.647	135.968	135.314	134.68	134.064	133.468	132.887	132.321	131.77	131.232	130.706	130.192	129.689	129.196	128.713	128.239	127.774	127.317	126.868	126.427	125.992	125.565	125.144	124.729	124.321	123.917	123.52	123.128	122.74	122.358	121.98	121.607	121.238
650	155.364	152.979	151.016	149.332	147.84	146.499	145.274	144.143	143.091	142.106	141.178	140.3	139.464	138.665	137.9	137.167	136.462	135.78	135.121	134.485	133.865	133.265	132.681	132.112	131.558	131.016	130.488	129.97	129.465	128.968	128.483	128.006	127.539	127.079	126.628	126.183	125.747	125.317	124.893	124.476	124.064	123.659	123.259	122.864	122.474	122.089	121.709	121.333	120.961
655	155.265	152.873	150.901	149.207	147.71	146.362	145.131	143.995	142.939	141.949	141.016	140.133	139.294	138.492	137.723	136.985	136.276	135.592	134.929	134.289	133.667	133.063	132.476	131.904	131.347	130.802	130.271	129.75	129.241	128.743	128.254	127.775	127.304	126.842	126.388	125.94	125.501	125.068	124.643	124.222	123.808	123.401	122.997	122.6	122.208	121.82	121.438	121.059	120.685
660	155.167	152.767	150.786	149.083	147.581	146.226	144.988	143.849	142.788	141.793	140.856	139.967	139.123	138.318	137.546	136.805	136.091	135.403	134.738	134.093	133.469	132.861	132.271	131.696	131.135	130.588	130.053	129.531	129.018	128.517	128.025	127.544	127.07	126.605	126.148	125.699	125.256	124.821	124.392	123.969	123.553	123.142	122.737	122.337	121.942	121.552	121.167	120.786	120.41
665	155.069	152.66	150.672	148.959	147.451	146.089	144.848	143.703	142.637	141.638	140.696	139.803	138.954	138.144	137.369	136.625	135.906	135.215	134.547	133.898	133.271	132.661	132.066	131.489	130.924	130.375	129.837	129.311	128.796	128.292	127.797	127.313	126.836	126.369	125.908	125.457	125.011	124.574	124.142	123.717	123.298	122.884	122.477	122.074	121.677	121.284	120.896	120.513	120.134
670	154.972	152.554	150.557	148.838	147.322	145.953	144.708	143.557	142.486	141.482	140.536	139.639	138.786	137.971	137.192	136.444	135.723	135.027	134.356	133.705	133.073	132.46	131.863	131.282	130.715	130.161	129.621	129.091	128.574	128.066	127.57	127.081	126.603	126.132	125.67	125.215	124.767	124.327	123.892	123.465	123.043	122.627	122.217	121.811	121.412	121.016	120.626	120.24	119.858
675	154.877	152.447	150.442	148.717	147.192	145.82	144.568	143.412	142.335	141.327	140.376	139.475	138.618	137.8	137.016	136.264	135.54	134.841	134.165	133.511	132.876	132.26	131.66	131.074	130.505	129.948	129.405	128.873	128.353	127.842	127.342	126.851	126.37	125.896	125.432	124.973	124.524	124.08	123.643	123.213	122.788	122.37	121.956	121.549	121.146	120.749	120.356	119.967	119.583
680	154.782	152.341	150.327	148.595	147.062	145.686	144.428	143.266	142.185	141.171	140.216	139.312	138.451	137.629	136.841	136.084	135.357	134.655	133.975	133.318	132.68	132.059	131.457	130.868	130.296	129.736	129.189	128.655	128.131	127.619	127.115	126.622	126.137	125.661	125.193	124.733	124.28	123.834	123.394	122.961	122.534	122.113	121.697	121.287	120.882	120.482	120.086	119.695	119.309
685	154.687	152.235	150.213	148.474	146.935	145.552	144.288	143.12	142.034	141.016	140.056	139.148	138.283	137.458	136.666	135.906	135.174	134.469	133.786	133.124	132.484	131.86	131.254	130.663	130.086	129.525	128.974	128.437	127.91	127.395	126.888	126.393	125.905	125.426	124.955	124.492	124.036	123.588	123.145	122.71	122.28	121.856	121.438	121.025	120.617	120.215	119.816	119.423	119.034
690	154.592	152.128	150.098	148.353	146.808	145.419	144.148	142.975	141.885	140.863	139.898	138.984	138.116	137.286	136.492	135.728	134.991	134.283	133.597	132.932	132.288	131.661	131.051	130.458	129.878	129.313	128.76	128.219	127.69	127.171	126.663	126.163	125.673	125.191	124.718	124.252	123.793	123.342	122.897	122.459	122.026	121.6	121.179	120.764	120.353	119.948	119.547	119.151	118.759
695	154.497	152.022	149.983	148.231	146.681	145.285	144.008	142.832	141.737	140.71	139.741	138.823	137.949	137.115	136.317	135.55	134.811	134.097	133.409	132.74	132.092	131.463	130.849	130.253	129.67	129.101	128.546	128.001	127.47	126.948	126.437	125.934	125.442	124.957	124.481	124.012	123.551	123.096	122.649	122.208	121.773	121.344	120.92	120.502	120.089	119.681	119.278	118.879	118.485
700	154.402	151.918	149.872	148.11	146.555	145.151	143.871	142.689	141.589	140.557	139.584	138.661	137.784	136.945	136.143	135.372	134.63	133.912	133.22	132.549	131.897	131.264	130.648	130.047	129.463	128.89	128.332	127.785	127.25	126.726	126.211	125.706	125.21	124.723	124.244	123.772	123.309	122.851	122.401	121.957	121.52	121.088	120.662	120.241	119.825	119.415	119.009	118.608	118.211
705	154.307	151.815	149.76	147.989	146.428	145.018	143.733	142.546	141.441	140.404	139.426	138.5	137.618	136.776	135.969	135.195	134.449	133.729	133.031	132.358	131.703	131.066	130.447	129.843	129.255	128.681	128.118	127.569	127.03	126.503	125.985	125.478	124.979	124.489	124.007	123.533	123.066	122.607	122.154	121.707	121.267	120.832	120.404	119.98	119.562	119.148	118.74	118.336	117.936
710	154.212	151.712	149.648	147.871	146.302	144.886	143.596	142.403	141.293	140.251	139.269	138.339	137.453	136.607	135.796	135.017	134.268	133.545	132.844	132.166	131.509	130.868	130.246	129.64	129.048	128.471	127.905	127.353	126.811	126.281	125.761	125.25	124.749	124.256	123.771	123.294	122.825	122.362	121.906	121.457	121.014	120.577	120.145	119.719	119.299	118.882	118.471	118.065	117.663
715	154.117	151.609	149.537	147.752	146.175	144.756	143.459	142.26	141.144	140.098	139.112	138.177	137.288	136.439	135.624	134.841	134.088	133.361	132.658	131.975	131.315	130.672	130.045	129.437	128.841	128.261	127.693	127.137	126.593	126.059	125.536	125.022	124.519	124.022	123.535	123.055	122.583	122.118	121.66	121.208	120.762	120.322	119.888	119.459	119.035	118.617	118.203	117.794	117.389
720	154.022	151.505	149.425	147.634	146.049	144.625	143.322	142.118	140.996	139.946	138.955	138.016	137.123	136.27	135.452	134.666	133.908	133.177	132.471	131.786	131.121	130.475	129.846	129.233	128.635	128.051	127.481	126.921	126.375	125.838	125.312	124.796	124.288	123.79	123.299	122.817	122.342	121.874	121.413	120.958	120.51	120.067	119.63	119.199	118.772	118.351	117.934	117.523	117.115
725	153.93	151.402	149.313	147.516	145.924	144.494	143.184	141.975	140.851	139.796	138.8	137.857	136.958	136.101	135.28	134.49	133.729	132.994	132.285	131.596	130.927	130.279	129.647	129.03	128.43	127.842	127.268	126.707	126.156	125.617	125.088	124.569	124.058	123.557	123.064	122.579	122.101	121.63	121.166	120.709	120.258	119.812	119.373	118.938	118.509	118.085	117.666	117.252	116.842
730	153.838	151.299	149.201	147.397	145.8	144.363	143.047	141.835	140.705	139.645	138.646	137.698	136.795	135.933	135.108	134.315	133.551	132.812	132.098	131.407	130.735	130.082	129.447	128.828	128.224	127.634	127.056	126.492	125.938	125.397	124.864	124.342	123.829	123.325	122.829	122.341	121.86	121.387	120.92	120.46	120.005	119.558	119.115	118.678	118.247	117.82	117.398	116.981	116.568
735	153.746	151.196	149.09	147.279	145.677	144.232	142.912	141.694	140.56	139.495	138.491	137.539	136.633	135.767	134.936	134.139	133.372	132.63	131.912	131.218	130.543	129.886	129.248	128.626	128.018	127.425	126.845	126.277	125.721	125.176	124.641	124.116	123.6	123.093	122.594	122.103	121.62	121.143	120.674	120.211	119.754	119.303	118.858	118.419	117.984	117.555	117.13	116.71	116.295
740	153.654	151.093	148.979	147.161	145.553	144.101	142.777	141.554	140.414	139.345	138.336	137.38	136.47	135.6	134.766	133.964	133.193	132.449	131.728	131.028	130.351	129.692	129.049	128.424	127.813	127.217	126.634	126.063	125.504	124.955	124.418	123.89	123.371	122.861	122.359	121.865	121.379	120.9	120.428	119.962	119.503	119.049	118.601	118.159	117.722	117.29	116.862	116.44	116.021
745	153.562	150.99	148.87	147.042	145.429	143.971	142.642	141.414	140.269	139.194	138.181	137.221	136.307	135.433	134.596	133.791	133.015	132.267	131.543	130.84	130.159	129.497	128.851	128.223	127.609	127.009	126.423	125.849	125.287	124.736	124.195	123.664	123.142	122.63	122.125	121.628	121.139	120.657	120.182	119.714	119.251	118.795	118.344	117.899	117.459	117.024	116.595	116.169	115.748
750	153.471	150.889	148.761	146.926	145.305	143.843	142.508	141.273	140.123	139.044	138.026	137.062	136.144	135.267	134.426	133.617	132.838	132.085	131.358	130.653	129.967	129.302	128.654	128.021	127.405	126.802	126.213	125.636	125.07	124.517	123.972	123.439	122.914	122.398	121.891	121.391	120.899	120.415	119.936	119.465	119	118.541	118.088	117.64	117.197	116.76	116.327	115.899	115.475
755	153.379	150.789	148.652	146.81	145.182	143.714	142.373	141.133	139.978	138.895	137.873	136.904	135.981	135.1	134.256	133.444	132.661	131.905	131.174	130.465	129.777	129.107	128.456	127.82	127.201	126.595	126.002	125.423	124.854	124.297	123.75	123.213	122.686	122.167	121.657	121.154	120.66	120.172	119.691	119.217	118.749	118.287	117.831	117.381	116.935	116.495	116.059	115.628	115.202
760	153.287	150.689	148.543	146.695	145.058	143.586	142.239	140.993	139.835	138.747	137.721	136.748	135.821	134.935	134.086	133.271	132.485	131.725	130.989	130.278	129.586	128.913	128.259	127.62	126.996	126.388	125.792	125.209	124.638	124.078	123.528	122.988	122.458	121.936	121.423	120.918	120.42	119.93	119.446	118.969	118.499	118.034	117.575	117.121	116.673	116.23	115.792	115.358	114.929
765	153.195	150.588	148.434	146.579	144.936	143.458	142.104	140.855	139.691	138.599	137.568	136.591	135.66	134.77	133.917	133.097	132.308	131.545	130.806	130.09	129.396	128.72	128.061	127.42	126.793	126.181	125.583	124.996	124.423	123.859	123.307	122.764	122.23	121.706	121.19	120.681	120.181	119.688	119.201	118.721	118.248	117.78	117.319	116.862	116.411	115.965	115.524	115.088	114.656
770	153.103	150.488	148.325	146.463	144.814	143.33	141.97	140.717	139.548	138.451	137.416	136.434	135.499	134.606	133.749	132.925	132.131	131.365	130.623	129.903	129.205	128.527	127.865	127.22	126.591	125.975	125.374	124.784	124.207	123.641	123.085	122.539	122.002	121.475	120.956	120.445	119.942	119.446	118.956	118.474	117.997	117.527	117.062	116.603	116.149	115.701	115.257	114.817	114.383
775	153.012	150.388	148.216	146.348	144.693	143.201	141.838	140.579	139.405	138.303	137.263	136.277	135.338	134.441	133.581	132.753	131.955	131.185	130.44	129.718	129.015	128.333	127.669	127.02	126.388	125.769	125.164	124.572	123.991	123.423	122.864	122.315	121.776	121.245	120.723	120.209	119.703	119.204	118.712	118.226	117.747	117.274	116.806	116.344	115.888	115.436	114.989	114.547	114.11
780	152.922	150.287	148.108	146.232	144.572	143.073	141.706	140.441	139.262	138.155	137.111	136.121	135.178	134.277	133.413	132.581	131.78	131.006	130.258	129.532	128.826	128.14	127.473	126.821	126.185	125.564	124.955	124.36	123.777	123.204	122.643	122.091	121.549	121.015	120.49	119.973	119.464	118.962	118.467	117.978	117.497	117.02	116.55	116.085	115.626	115.171	114.722	114.277	113.836
785	152.833	150.187	147.999	146.116	144.451	142.946	141.573	140.303	139.119	138.007	136.959	135.964	135.017	134.112	133.244	132.41	131.605	130.827	130.075	129.346	128.637	127.947	127.277	126.622	125.982	125.358	124.747	124.148	123.562	122.986	122.422	121.867	121.322	120.785	120.257	119.738	119.225	118.721	118.223	117.731	117.246	116.767	116.294	115.826	115.364	114.907	114.454	114.007	113.563
790	152.744	150.087	147.893	146.001	144.33	142.82	141.441	140.165	138.976	137.861	136.808	135.81	134.858	133.948	133.076	132.238	131.43	130.649	129.893	129.16	128.448	127.756	127.081	126.423	125.781	125.153	124.539	123.937	123.348	122.769	122.201	121.643	121.095	120.556	120.025	119.502	118.987	118.479	117.978	117.484	116.996	116.514	116.038	115.568	115.102	114.642	114.187	113.736	113.29
795	152.655	149.987	147.786	145.888	144.209	142.694	141.309	140.027	138.835	137.715	136.658	135.655	134.699	133.786	132.909	132.067	131.256	130.471	129.712	128.974	128.26	127.564	126.886	126.225	125.579	124.948	124.331	123.726	123.133	122.552	121.98	121.42	120.868	120.326	119.792	119.267	118.749	118.238	117.734	117.237	116.746	116.261	115.782	115.309	114.841	114.378	113.92	113.466	113.017
800	152.566	149.889	147.68	145.775	144.088	142.568	141.177	139.891	138.694	137.569	136.508	135.5	134.541	133.623	132.743	131.896	131.081	130.293	129.53	128.79	128.071	127.372	126.691	126.026	125.378	124.743	124.122	123.515	122.919	122.335	121.761	121.197	120.642	120.097	119.56	119.031	118.51	117.997	117.49	116.99	116.496	116.008	115.527	115.05	114.579	114.113	113.652	113.196	112.744
805	152.477	149.792	147.574	145.662	143.967	142.443	141.045	139.756	138.553	137.424	136.357	135.346	134.382	133.461	132.577	131.727	130.907	130.115	129.349	128.606	127.883	127.18	126.496	125.828	125.176	124.539	123.915	123.304	122.705	122.117	121.541	120.973	120.416	119.868	119.328	118.796	118.272	117.756	117.246	116.743	116.246	115.756	115.271	114.792	114.318	113.849	113.385	112.925	112.47
810	152.388	149.694	147.468	145.549	143.848	142.317	140.914	139.62	138.412	137.278	136.207	135.191	134.223	133.298	132.411	131.557	130.734	129.938	129.168	128.421	127.696	126.989	126.302	125.631	124.975	124.335	123.708	123.093	122.492	121.901	121.321	120.751	120.19	119.639	119.096	118.561	118.034	117.515	117.002	116.496	115.996	115.503	115.015	114.533	114.056	113.584	113.117	112.655	112.197
815	152.299	149.596	147.361	145.435	143.73	142.191	140.784	139.484	138.271	137.132	136.056	135.036	134.064	133.135	132.244	131.387	130.56	129.761	128.987	128.237	127.508	126.798	126.107	125.433	124.775	124.13	123.501	122.883	122.278	121.684	121.101	120.528	119.964	119.41	118.864	118.327	117.797	117.274	116.758	116.249	115.747	115.25	114.759	114.274	113.794	113.319	112.85	112.384	111.923
820	152.21	149.499	147.255	145.322	143.611	142.065	140.654	139.348	138.13	136.986	135.907	134.883	133.907	132.973	132.078	131.217	130.387	129.585	128.807	128.053	127.321	126.608	125.913	125.236	124.574	123.927	123.294	122.673	122.065	121.468	120.881	120.306	119.739	119.181	118.633	118.092	117.559	117.033	116.515	116.002	115.497	114.997	114.504	114.016	113.533	113.055	112.582	112.114	111.65
825	152.121	149.401	147.149	145.209	143.492	141.941	140.524	139.213	137.989	136.842	135.759	134.73	133.75	132.812	131.913	131.048	130.214	129.408	128.627	127.869	127.134	126.418	125.72	125.038	124.374	123.723	123.087	122.463	121.852	121.252	120.662	120.083	119.514	118.953	118.401	117.857	117.321	116.792	116.271	115.756	115.247	114.745	114.248	113.757	113.271	112.79	112.314	111.843	111.376
830	152.032	149.303	147.043	145.096	143.374	141.817	140.395	139.077	137.85	136.699	135.61	134.577	133.593	132.652	131.748	130.879	130.041	129.232	128.448	127.687	126.947	126.227	125.526	124.842	124.174	123.52	122.88	122.253	121.639	121.035	120.443	119.861	119.288	118.724	118.169	117.623	117.084	116.552	116.027	115.509	114.998	114.492	113.992	113.498	113.009	112.525	112.046	111.572	111.102
835	151.945	149.206	146.938	144.984	143.255	141.693	140.265	138.942	137.711	136.555	135.462	134.425	133.436	132.491	131.584	130.711	129.869	129.055	128.268	127.504	126.761	126.037	125.333	124.646	123.973	123.317	122.674	122.044	121.426	120.82	120.224	119.639	119.063	118.496	117.938	117.388	116.846	116.311	115.784	115.263	114.748	114.239	113.737	113.239	112.747	112.261	111.779	111.301	110.828
840	151.859	149.108	146.834	144.873	143.136	141.57	140.135	138.809	137.573	136.411	135.313	134.272	133.279	132.33	131.419	130.543	129.697	128.88	128.088	127.321	126.574	125.848	125.14	124.449	123.774	123.114	122.468	121.834	121.214	120.604	120.005	119.417	118.838	118.268	117.707	117.154	116.609	116.071	115.54	115.016	114.498	113.987	113.481	112.981	112.486	111.996	111.51	111.03	110.554
845	151.772	149.01	146.73	144.762	143.017	141.446	140.005	138.675	137.434	136.267	135.165	134.119	133.123	132.169	131.255	130.375	129.526	128.705	127.909	127.138	126.388	125.659	124.947	124.253	123.575	122.911	122.262	121.625	121.001	120.389	119.787	119.195	118.613	118.04	117.476	116.92	116.371	115.83	115.297	114.769	114.249	113.734	113.225	112.722	112.224	111.731	111.242	110.759	110.28
850	151.686	148.915	146.627	144.651	142.901	141.323	139.877	138.542	137.295	136.123	135.017	133.967	132.966	132.009	131.09	130.207	129.354	128.53	127.731	126.955	126.202	125.469	124.755	124.057	123.376	122.709	122.056	121.417	120.789	120.173	119.568	118.973	118.388	117.812	117.245	116.685	116.134	115.59	115.053	114.523	113.999	113.481	112.969	112.463	111.962	111.465	110.974	110.487	110.006
855	151.6	148.82	146.523	144.541	142.784	141.199	139.749	138.408	137.156	135.98	134.87	133.816	132.811	131.849	130.926	130.038	129.182	128.355	127.552	126.774	126.016	125.28	124.562	123.861	123.176	122.507	121.85	121.208	120.577	119.958	119.35	118.752	118.163	117.584	117.013	116.451	115.897	115.35	114.81	114.276	113.749	113.228	112.713	112.204	111.699	111.2	110.706	110.216	109.731
860	151.513	148.725	146.419	144.43	142.668	141.076	139.621	138.275	137.017	135.838	134.723	133.665	132.656	131.69	130.764	129.872	129.011	128.18	127.374	126.592	125.831	125.091	124.37	123.666	122.977	122.304	121.645	120.999	120.365	119.743	119.131	118.53	117.939	117.356	116.783	116.217	115.66	115.109	114.566	114.03	113.5	112.976	112.457	111.945	111.437	110.935	110.437	109.945	109.456
865	151.427	148.63	146.315	144.319	142.551	140.953	139.494	138.141	136.88	135.696	134.577	133.514	132.501	131.531	130.601	129.705	128.841	128.005	127.196	126.41	125.647	124.903	124.178	123.471	122.779	122.102	121.44	120.79	120.153	119.528	118.913	118.309	117.714	117.129	116.552	115.983	115.422	114.869	114.323	113.783	113.25	112.723	112.201	111.685	111.175	110.669	110.169	109.673	109.181
870	151.34	148.534	146.212	144.209	142.435	140.832	139.366	138.007	136.743	135.554	134.43	133.363	132.345	131.372	130.438	129.538	128.67	127.831	127.017	126.229	125.462	124.715	123.986	123.275	122.58	121.9	121.235	120.582	119.941	119.313	118.695	118.087	117.49	116.901	116.321	115.749	115.185	114.629	114.079	113.537	113	112.47	111.945	111.426	110.913	110.404	109.9	109.401	108.906
875	151.254	148.439	146.108	144.098	142.318	140.71	139.238	137.876	136.606	135.412	134.283	133.212	132.19	131.213	130.275	129.372	128.5	127.657	126.84	126.047	125.277	124.527	123.795	123.08	122.382	121.699	121.029	120.374	119.73	119.098	118.477	117.866	117.265	116.673	116.09	115.515	114.948	114.389	113.836	113.29	112.75	112.217	111.689	111.167	110.65	110.138	109.631	109.128	108.63
880	151.168	148.344	146.004	143.987	142.202	140.589	139.11	137.744	136.469	135.27	134.137	133.061	132.035	131.054	130.112	129.205	128.33	127.484	126.663	125.867	125.092	124.339	123.603	122.885	122.184	121.498	120.825	120.166	119.519	118.883	118.259	117.645	117.041	116.446	115.86	115.281	114.711	114.148	113.592	113.043	112.5	111.964	111.433	110.907	110.387	109.872	109.362	108.856	108.354
885	151.081	148.249	145.902	143.879	142.085	140.467	138.983	137.612	136.332	135.128	133.99	132.911	131.881	130.896	129.949	129.039	128.16	127.31	126.486	125.686	124.908	124.151	123.412	122.691	121.986	121.296	120.62	119.958	119.308	118.669	118.041	117.424	116.817	116.218	115.629	115.048	114.474	113.908	113.349	112.796	112.251	111.711	111.176	110.648	110.124	109.606	109.093	108.583	108.079
890	150.995	148.154	145.801	143.771	141.969	140.346	138.857	137.481	136.195	134.986	133.846	132.762	131.728	130.738	129.788	128.873	127.99	127.136	126.309	125.506	124.724	123.963	123.221	122.497	121.788	121.095	120.416	119.75	119.096	118.455	117.824	117.203	116.593	115.991	115.398	114.814	114.237	113.668	113.105	112.55	112.001	111.457	110.92	110.388	109.861	109.34	108.823	108.31	107.802
895	150.911	148.059	145.699	143.662	141.855	140.225	138.731	137.349	136.058	134.846	133.701	132.612	131.574	130.581	129.626	128.708	127.821	126.963	126.132	125.325	124.54	123.776	123.03	122.302	121.591	120.894	120.211	119.542	118.885	118.24	117.606	116.982	116.369	115.764	115.168	114.58	114	113.427	112.862	112.303	111.75	111.204	110.663	110.128	109.598	109.073	108.553	108.038	107.526
900	150.827	147.964	145.598	143.554	141.741	140.103	138.605	137.218	135.922	134.706	133.556	132.463	131.421	130.423	129.465	128.543	127.652	126.791	125.955	125.145	124.357	123.589	122.84	122.108	121.393	120.693	120.007	119.335	118.675	118.026	117.389	116.762	116.144	115.536	114.937	114.346	113.763	113.187	112.618	112.056	111.5	110.951	110.406	109.868	109.335	108.807	108.283	107.764	107.249
905	150.743	147.871	145.496	143.445	141.626	139.982	138.48	137.086	135.787	134.566	133.411	132.314	131.267	130.265	129.304	128.377	127.483	126.618	125.779	124.965	124.173	123.402	122.649	121.914	121.196	120.492	119.803	119.127	118.464	117.812	117.171	116.541	115.92	115.309	114.706	114.112	113.526	112.947	112.374	111.809	111.25	110.697	110.15	109.608	109.071	108.54	108.013	107.49	106.972
910	150.659	147.779	145.395	143.337	141.512	139.863	138.354	136.955	135.652	134.426	133.266	132.164	131.114	130.108	129.142	128.212	127.314	126.446	125.603	124.785	123.989	123.215	122.459	121.72	120.998	120.292	119.599	118.92	118.253	117.598	116.954	116.32	115.696	115.082	114.476	113.878	113.288	112.706	112.131	111.562	111	110.443	109.893	109.347	108.808	108.272	107.742	107.216	106.695
915	150.575	147.686	145.294	143.228	141.398	139.743	138.228	136.825	135.517	134.285	133.121	132.015	130.96	129.951	128.981	128.047	127.145	126.273	125.428	124.606	123.807	123.028	122.269	121.527	120.801	120.091	119.395	118.713	118.042	117.384	116.737	116.1	115.473	114.855	114.245	113.644	113.051	112.465	111.887	111.315	110.749	110.189	109.635	109.087	108.543	108.005	107.471	106.942	106.417
920	150.491	147.593	145.192	143.12	141.283	139.624	138.102	136.696	135.381	134.145	132.977	131.867	130.808	129.795	128.821	127.883	126.977	126.101	125.252	124.427	123.624	122.842	122.078	121.333	120.605	119.891	119.191	118.506	117.832	117.17	116.52	115.879	115.249	114.627	114.015	113.41	112.814	112.225	111.643	111.068	110.498	109.936	109.378	108.826	108.279	107.738	107.2	106.668	106.139
925	150.407	147.5	145.091	143.011	141.169	139.504	137.977	136.566	135.246	134.005	132.833	131.719	130.656	129.638	128.661	127.719	126.809	125.929	125.076	124.247	123.441	122.655	121.889	121.14	120.408	119.691	118.988	118.298	117.622	116.956	116.302	115.659	115.025	114.4	113.784	113.177	112.577	111.984	111.399	110.82	110.248	109.681	109.121	108.565	108.015	107.47	106.929	106.393	105.861
930	150.324	147.407	144.989	142.904	141.055	139.385	137.853	136.436	135.111	133.867	132.69	131.572	130.504	129.482	128.5	127.555	126.641	125.758	124.9	124.068	123.258	122.469	121.699	120.947	120.211	119.491	118.784	118.091	117.411	116.743	116.085	115.438	114.801	114.173	113.554	112.943	112.339	111.744	111.155	110.573	109.997	109.427	108.863	108.304	107.75	107.202	106.657	106.118	105.582
935	150.24	147.314	144.89	142.798	140.941	139.265	137.729	136.306	134.976	133.728	132.547	131.424	130.352	129.326	128.34	127.391	126.474	125.586	124.725	123.889	123.076	122.283	121.51	120.754	120.014	119.29	118.581	117.884	117.201	116.529	115.868	115.218	114.577	113.946	113.323	112.709	112.102	111.503	110.911	110.325	109.746	109.172	108.605	108.043	107.485	106.933	106.385	105.842	105.303
940	150.156	147.222	144.791	142.692	140.829	139.146	137.605	136.176	134.843	133.589	132.403	131.276	130.2	129.17	128.18	127.227	126.306	125.415	124.551	123.711	122.893	122.097	121.32	120.561	119.818	119.09	118.378	117.678	116.991	116.315	115.651	114.997	114.353	113.718	113.092	112.474	111.865	111.262	110.666	110.077	109.494	108.918	108.347	107.781	107.22	106.664	106.113	105.566	105.024
945	150.072	147.129	144.691	142.585	140.716	139.027	137.481	136.047	134.709	133.451	132.26	131.128	130.048	129.014	128.02	127.063	126.138	125.244	124.376	123.532	122.711	121.911	121.131	120.368	119.622	118.891	118.174	117.471	116.78	116.102	115.434	114.777	114.129	113.491	112.862	112.24	111.627	111.021	110.422	109.829	109.243	108.663	108.088	107.519	106.955	106.395	105.841	105.29	104.744
950	149.988	147.036	144.592	142.479	140.604	138.909	137.357	135.918	134.576	133.312	132.117	130.981	129.897	128.859	127.861	126.9	125.971	125.072	124.201	123.354	122.53	121.726	120.941	120.175	119.426	118.691	117.971	117.264	116.57	115.888	115.217	114.556	113.905	113.264	112.631	112.006	111.389	110.78	110.177	109.581	108.992	108.408	107.83	107.257	106.689	106.126	105.568	105.014	104.464
955	149.906	146.944	144.492	142.372	140.492	138.791	137.233	135.79	134.442	133.174	131.974	130.834	129.746	128.704	127.702	126.737	125.804	124.902	124.026	123.176	122.348	121.541	120.753	119.982	119.229	118.491	117.768	117.058	116.36	115.675	115	114.336	113.682	113.037	112.4	111.772	111.152	110.538	109.933	109.333	108.74	108.153	107.571	106.995	106.423	105.857	105.295	104.737	104.183
960	149.825	146.854	144.393	142.266	140.379	138.673	137.109	135.662	134.309	133.035	131.832	130.688	129.596	128.549	127.543	126.574	125.638	124.731	123.852	122.997	122.166	121.355	120.564	119.79	119.033	118.292	117.565	116.851	116.15	115.461	114.783	114.115	113.458	112.809	112.169	111.538	110.914	110.297	109.688	109.085	108.488	107.897	107.312	106.732	106.157	105.587	105.021	104.459	103.902
965	149.743	146.763	144.294	142.16	140.267	138.556	136.985	135.534	134.175	132.898	131.69	130.542	129.445	128.394	127.384	126.411	125.471	124.561	123.678	122.82	121.984	121.17	120.375	119.598	118.837	118.092	117.362	116.645	115.94	115.248	114.566	113.895	113.234	112.582	111.938	111.303	110.676	110.056	109.443	108.836	108.236	107.641	107.053	106.469	105.89	105.316	104.747	104.182	103.62
970	149.661	146.672	144.194	142.053	140.155	138.438	136.863	135.406	134.042	132.761	131.548	130.395	129.294	128.239	127.226	126.249	125.305	124.391	123.504	122.642	121.803	120.985	120.186	119.406	118.642	117.893	117.159	116.438	115.73	115.034	114.349	113.675	113.01	112.354	111.707	111.069	110.438	109.814	109.198	108.587	107.984	107.385	106.793	106.206	105.623	105.046	104.472	103.904	103.339
975	149.58	146.582	144.095	141.948	140.042	138.321	136.741	135.278	133.91	132.624	131.407	130.249	129.144	128.085	127.067	126.086	125.138	124.22	123.33	122.464	121.622	120.8	119.997	119.213	118.446	117.694	116.956	116.232	115.52	114.821	114.132	113.454	112.786	112.127	111.476	110.834	110.2	109.572	108.952	108.338	107.731	107.129	106.533	105.942	105.356	104.775	104.198	103.625	103.057
980	149.498	146.491	143.996	141.843	139.931	138.203	136.619	135.15	133.778	132.487	131.265	130.103	128.993	127.93	126.908	125.924	124.972	124.05	123.156	122.287	121.441	120.615	119.809	119.021	118.25	117.495	116.753	116.026	115.311	114.607	113.915	113.234	112.562	111.899	111.245	110.599	109.961	109.33	108.707	108.089	107.478	106.873	106.273	105.678	105.089	104.503	103.923	103.346	102.773
985	149.416	146.4	143.898	141.739	139.82	138.085	136.497	135.022	133.646	132.35	131.123	129.957	128.844	127.777	126.751	125.762	124.806	123.88	122.982	122.109	121.259	120.431	119.621	118.829	118.054	117.295	116.551	115.819	115.101	114.394	113.698	113.013	112.338	111.671	111.014	110.364	109.723	109.089	108.461	107.84	107.225	106.616	106.013	105.414	104.821	104.232	103.647	103.067	102.49
990	149.334	146.309	143.801	141.634	139.71	137.968	136.374	134.895	133.514	132.213	130.981	129.812	128.694	127.623	126.593	125.6	124.641	123.711	122.809	121.932	121.078	120.246	119.433	118.638	117.859	117.096	116.348	115.613	114.891	114.181	113.481	112.792	112.113	111.444	110.782	110.13	109.484	108.846	108.215	107.59	106.972	106.359	105.752	105.15	104.552	103.96	103.371	102.787	102.206
995	149.253	146.219	143.704	141.53	139.599	137.853	136.252	134.768	133.382	132.076	130.841	129.667	128.545	127.469	126.435	125.438	124.475	123.542	122.636	121.755	120.898	120.061	119.244	118.446	117.664	116.897	116.145	115.407	114.681	113.967	113.264	112.572	111.889	111.216	110.551	109.895	109.245	108.604	107.969	107.341	106.718	106.102	105.491	104.885	104.283	103.687	103.095	102.506	101.922
1000	149.171	146.128	143.606	141.425	139.489	137.737	136.13	134.642	133.25	131.94	130.701	129.522	128.395	127.316	126.278	125.277	124.309	123.372	122.463	121.578	120.717	119.877	119.056	118.254	117.468	116.698	115.943	115.201	114.471	113.754	113.047	112.351	111.665	110.988	110.319	109.659	109.007	108.361	107.723	107.091	106.464	105.844	105.229	104.619	104.015	103.414	102.818	102.225	101.637
1005	149.089	146.037	143.509	141.321	139.378	137.621	136.008	134.515	133.118	131.804	130.56	129.377	128.246	127.162	126.12	125.115	124.144	123.203	122.29	121.402	120.537	119.693	118.868	118.062	117.273	116.499	115.74	114.994	114.261	113.54	112.83	112.13	111.441	110.76	110.088	109.424	108.768	108.119	107.476	106.84	106.211	105.586	104.968	104.354	103.745	103.141	102.54	101.944	101.351
1010	149.008	145.948	143.412	141.216	139.268	137.505	135.887	134.389	132.986	131.668	130.42	129.231	128.096	127.008	125.962	124.954	123.978	123.034	122.117	121.225	120.356	119.509	118.681	117.871	117.078	116.3	115.537	114.788	114.052	113.327	112.613	111.91	111.216	110.532	109.856	109.188	108.528	107.876	107.229	106.59	105.956	105.328	104.706	104.088	103.475	102.867	102.262	101.662	101.066
1015	148.928	145.859	143.314	141.112	139.157	137.389	135.766	134.262	132.856	131.533	130.279	129.086	127.947	126.856	125.806	124.793	123.814	122.865	121.944	121.048	120.176	119.324	118.493	117.679	116.882	116.101	115.335	114.582	113.842	113.113	112.396	111.689	110.992	110.303	109.624	108.953	108.289	107.632	106.983	106.339	105.701	105.07	104.443	103.822	103.205	102.592	101.985	101.379	100.779
1020	148.848	145.77	143.217	141.007	139.046	137.273	135.646	134.136	132.725	131.397	130.139	128.942	127.799	126.703	125.649	124.632	123.649	122.696	121.771	120.872	119.995	119.14	118.305	117.488	116.687	115.903	115.132	114.376	113.632	112.9	112.179	111.468	110.767	110.075	109.392	108.717	108.05	107.389	106.735	106.088	105.446	104.811	104.181	103.555	102.934	102.317	101.705	101.097	100.491
1025	148.769	145.682	143.119	140.904	138.937	137.157	135.525	134.009	132.595	131.262	129.998	128.798	127.651	126.551	125.492	124.471	123.484	122.528	121.599	120.695	119.815	118.956	118.117	117.296	116.492	115.704	114.93	114.17	113.422	112.686	111.961	111.247	110.542	109.847	109.16	108.481	107.81	107.145	106.488	105.837	105.191	104.552	103.918	103.288	102.663	102.043	101.425	100.813	100.204
1030	148.689	145.593	143.022	140.802	138.828	137.042	135.405	133.884	132.464	131.126	129.859	128.654	127.503	126.398	125.335	124.31	123.319	122.359	121.426	120.519	119.635	118.773	117.93	117.105	116.297	115.505	114.727	113.963	113.212	112.472	111.744	111.026	110.317	109.618	108.928	108.245	107.569	106.902	106.24	105.585	104.936	104.292	103.654	103.021	102.391	101.766	101.146	100.528	99.9156
1035	148.609	145.504	142.926	140.699	138.719	136.927	135.284	133.759	132.334	130.991	129.72	128.51	127.354	126.245	125.179	124.15	123.155	122.19	121.254	120.343	119.455	118.589	117.742	116.914	116.102	115.306	114.525	113.757	113.002	112.259	111.526	110.805	110.093	109.389	108.695	108.009	107.329	106.657	105.993	105.333	104.68	104.033	103.39	102.752	102.119	101.49	100.865	100.244	99.6259
1040	148.53	145.416	142.831	140.596	138.61	136.813	135.163	133.634	132.204	130.856	129.581	128.367	127.206	126.093	125.022	123.989	122.99	122.022	121.082	120.167	119.275	118.405	117.555	116.723	115.907	115.108	114.322	113.551	112.792	112.045	111.309	110.583	109.867	109.161	108.462	107.772	107.089	106.413	105.744	105.081	104.424	103.772	103.126	102.484	101.847	101.213	100.584	99.9591	99.3362
1045	148.45	145.327	142.735	140.494	138.502	136.698	135.043	133.509	132.073	130.722	129.442	128.223	127.058	125.941	124.866	123.829	122.826	121.854	120.91	119.991	119.095	118.222	117.367	116.531	115.712	114.909	114.12	113.345	112.582	111.831	111.092	110.362	109.642	108.932	108.229	107.535	106.848	106.169	105.495	104.828	104.167	103.511	102.861	102.215	101.573	100.936	100.302	99.6724	99.0465
1050	148.371	145.238	142.64	140.391	138.393	136.584	134.923	133.384	131.943	130.588	129.303	128.079	126.91	125.789	124.71	123.669	122.662	121.686	120.738	119.815	118.916	118.038	117.18	116.34	115.517	114.71	113.918	113.138	112.372	111.617	110.874	110.141	109.417	108.702	107.997	107.298	106.607	105.924	105.247	104.575	103.911	103.25	102.595	101.946	101.3	100.658	100.021	99.3857	98.7548
1055	148.291	145.15	142.544	140.288	138.284	136.47	134.804	133.259	131.814	130.453	129.163	127.936	126.763	125.637	124.554	123.509	122.498	121.518	120.566	119.639	118.736	117.854	116.993	116.149	115.322	114.511	113.715	112.932	112.162	111.403	110.656	109.919	109.191	108.473	107.763	107.061	106.366	105.678	104.998	104.322	103.653	102.99	102.33	101.676	101.026	100.379	99.7374	99.099	98.4628
1060	148.211	145.061	142.448	140.185	138.175	136.356	134.685	133.134	131.685	130.319	129.024	127.793	126.616	125.486	124.399	123.349	122.334	121.35	120.394	119.464	118.557	117.671	116.805	115.958	115.128	114.313	113.512	112.726	111.952	111.189	110.438	109.697	108.966	108.243	107.529	106.824	106.125	105.433	104.748	104.069	103.395	102.727	102.064	101.405	100.751	100.101	99.4537	98.8108	98.1707
1065	148.132	144.973	142.353	140.083	138.066	136.241	134.566	133.009	131.556	130.185	128.886	127.65	126.468	125.334	124.243	123.189	122.17	121.182	120.222	119.288	118.377	117.488	116.618	115.767	114.933	114.114	113.31	112.519	111.741	110.976	110.22	109.475	108.74	108.014	107.296	106.586	105.883	105.188	104.498	103.815	103.138	102.465	101.797	101.135	100.476	99.8211	99.17	98.5218	97.8776
1070	148.052	144.886	142.257	139.98	137.958	136.127	134.447	132.886	131.427	130.051	128.748	127.508	126.321	125.183	124.087	123.03	122.006	121.014	120.051	119.112	118.198	117.304	116.431	115.576	114.738	113.915	113.107	112.313	111.531	110.761	110.002	109.253	108.514	107.784	107.062	106.348	105.641	104.942	104.248	103.561	102.879	102.202	101.53	100.863	100.2	99.5405	98.8854	98.2327	97.583
1075	147.973	144.799	142.162	139.879	137.851	136.013	134.327	132.762	131.298	129.917	128.61	127.365	126.174	125.031	123.932	122.87	121.843	120.847	119.879	118.937	118.018	117.121	116.244	115.385	114.543	113.717	112.905	112.107	111.321	110.547	109.784	109.032	108.288	107.554	106.828	106.11	105.399	104.695	103.998	103.306	102.62	101.939	101.263	100.591	99.9241	99.2599	98.5994	97.9432	97.2884
1080	147.895	144.712	142.066	139.778	137.744	135.9	134.208	132.638	131.169	129.784	128.472	127.222	126.027	124.88	123.777	122.711	121.68	120.68	119.708	118.762	117.839	116.938	116.057	115.194	114.348	113.518	112.702	111.9	111.111	110.333	109.566	108.809	108.062	107.324	106.594	105.872	105.157	104.449	103.747	103.052	102.361	101.675	100.996	100.319	99.6466	98.9791	98.3135	97.6516	96.9937
1085	147.818	144.625	141.971	139.677	137.636	135.787	134.089	132.515	131.039	129.651	128.334	127.079	125.88	124.73	123.622	122.552	121.517	120.512	119.537	118.586	117.66	116.755	115.87	115.003	114.153	113.319	112.499	111.693	110.9	110.118	109.347	108.587	107.836	107.093	106.359	105.633	104.914	104.202	103.496	102.796	102.101	101.411	100.726	100.046	99.3691	98.6962	98.0275	97.3601	96.6964
1090	147.74	144.538	141.878	139.576	137.529	135.675	133.97	132.391	130.911	129.518	128.196	126.937	125.734	124.579	123.467	122.393	121.353	120.345	119.365	118.411	117.481	116.572	115.683	114.812	113.958	113.12	112.297	111.487	110.689	109.904	109.129	108.364	107.609	106.863	106.125	105.394	104.671	103.955	103.244	102.54	101.841	101.147	100.457	99.7724	99.0916	98.4133	97.7392	97.0685	96.399
1095	147.662	144.452	141.784	139.475	137.422	135.562	133.853	132.268	130.783	129.385	128.058	126.795	125.588	124.428	123.312	122.234	121.19	120.178	119.194	118.236	117.302	116.389	115.496	114.621	113.763	112.921	112.094	111.28	110.479	109.689	108.91	108.142	107.382	106.632	105.89	105.155	104.428	103.707	102.993	102.284	101.58	100.882	100.188	99.498	98.8125	98.1304	97.4507	96.7749	96.1017
1100	147.585	144.365	141.69	139.374	137.315	135.449	133.735	132.144	130.655	129.252	127.921	126.654	125.441	124.278	123.157	122.074	121.027	120.011	119.023	118.061	117.122	116.206	115.309	114.43	113.569	112.723	111.891	111.073	110.268	109.474	108.691	107.919	107.155	106.401	105.654	104.916	104.184	103.459	102.74	102.028	101.319	100.616	99.9182	99.2236	98.5327	97.8462	97.1623	96.4806	95.8025
1105	147.507	144.278	141.596	139.273	137.207	135.336	133.617	132.02	130.528	129.119	127.784	126.512	125.295	124.127	123.002	121.916	120.864	119.844	118.852	117.886	116.943	116.023	115.122	114.239	113.374	112.524	111.688	110.866	110.057	109.259	108.472	107.695	106.928	106.17	105.419	104.676	103.94	103.211	102.487	101.77	101.058	100.35	99.647	98.9487	98.2529	97.5608	96.8726	96.1864	95.5022
1110	147.429	144.191	141.502	139.172	137.1	135.224	133.5	131.898	130.4	128.986	127.647	126.37	125.149	123.976	122.848	121.757	120.701	119.677	118.681	117.711	116.764	115.84	114.935	114.048	113.179	112.325	111.485	110.659	109.846	109.044	108.253	107.472	106.701	105.938	105.183	104.436	103.696	102.963	102.235	101.512	100.796	100.084	99.3757	98.6721	97.9729	97.2754	96.5814	95.891	95.202
1115	147.352	144.104	141.409	139.071	136.993	135.111	133.382	131.775	130.272	128.854	127.51	126.229	125.003	123.826	122.693	121.599	120.539	119.51	118.51	117.536	116.585	115.657	114.748	113.857	112.984	112.126	111.282	110.452	109.635	108.829	108.034	107.249	106.473	105.706	104.947	104.196	103.451	102.713	101.982	101.255	100.533	99.8166	99.1045	98.3955	97.6907	96.99	96.2903	95.5939	94.9007
1120	147.274	144.017	141.315	138.971	136.887	134.998	133.264	131.653	130.144	128.722	127.373	126.087	124.857	123.677	122.539	121.44	120.376	119.343	118.339	117.361	116.407	115.474	114.561	113.666	112.789	111.927	111.079	110.245	109.424	108.614	107.815	107.026	106.245	105.474	104.711	103.955	103.206	102.464	101.727	100.997	100.27	99.5486	98.8319	98.1188	97.4084	96.7019	95.9991	95.2967	94.5973
1125	147.196	143.932	141.221	138.871	136.782	134.887	133.146	131.531	130.016	128.59	127.236	125.946	124.712	123.527	122.385	121.282	120.213	119.177	118.168	117.186	116.228	115.291	114.374	113.475	112.594	111.728	110.876	110.038	109.212	108.398	107.595	106.802	106.018	105.242	104.474	103.714	102.961	102.214	101.473	100.737	100.007	99.2805	98.5584	97.8408	97.1262	96.4139	95.7051	94.9996	94.294
1130	147.118	143.847	141.127	138.772	136.676	134.775	133.029	131.408	129.889	128.458	127.099	125.805	124.566	123.377	122.231	121.123	120.051	119.01	117.998	117.011	116.049	115.108	114.187	113.284	112.399	111.529	110.673	109.831	109.001	108.183	107.375	106.577	105.789	105.01	104.237	103.473	102.715	101.964	101.218	100.478	99.7426	99.0125	98.285	97.5617	96.8425	96.1259	95.4111	94.6994	93.9905
1135	147.041	143.762	141.033	138.672	136.57	134.664	132.912	131.286	129.762	128.326	126.962	125.664	124.421	123.227	122.076	120.965	119.888	118.843	117.827	116.837	115.87	114.925	114	113.093	112.204	111.329	110.47	109.623	108.789	107.967	107.155	106.353	105.561	104.777	104.001	103.231	102.469	101.713	100.963	100.218	99.4778	98.7424	98.0115	97.2827	96.5577	95.8363	95.1171	94.3992	93.6839
1140	146.964	143.677	140.941	138.573	136.464	134.553	132.796	131.164	129.636	128.194	126.826	125.523	124.276	123.077	121.922	120.807	119.726	118.677	117.657	116.662	115.691	114.742	113.813	112.902	112.008	111.13	110.266	109.416	108.578	107.751	106.935	106.129	105.332	104.543	103.763	102.99	102.223	101.462	100.707	99.9582	99.2129	98.4721	97.7358	97.0036	96.2728	95.5455	94.8213	94.0989	93.3772
1145	146.888	143.592	140.849	138.473	136.359	134.441	132.679	131.041	129.509	128.062	126.69	125.383	124.13	122.927	121.769	120.649	119.564	118.511	117.486	116.487	115.512	114.559	113.626	112.711	111.813	110.931	110.063	109.208	108.366	107.535	106.715	105.905	105.103	104.31	103.525	102.747	101.976	101.211	100.451	99.6967	98.9477	98.2019	97.4599	96.722	95.9879	95.2546	94.5242	93.7965	93.0705
1150	146.812	143.506	140.756	138.374	136.253	134.33	132.563	130.92	129.382	127.93	126.554	125.242	123.985	122.778	121.615	120.491	119.402	118.344	117.315	116.313	115.334	114.376	113.439	112.52	111.618	110.731	109.859	109.001	108.154	107.319	106.494	105.679	104.874	104.077	103.287	102.504	101.728	100.959	100.195	99.4351	98.6807	97.931	97.1841	96.4404	95.7002	94.9634	94.2272	93.493	92.7612
1155	146.736	143.421	140.664	138.274	136.147	134.219	132.446	130.799	129.256	127.8	126.418	125.101	123.84	122.629	121.462	120.333	119.24	118.178	117.145	116.138	115.155	114.193	113.252	112.329	111.423	110.532	109.655	108.793	107.942	107.103	106.273	105.454	104.644	103.843	103.049	102.261	101.481	100.706	99.9379	99.1736	98.4137	97.6584	96.9074	96.1587	95.4126	94.6696	93.9293	93.1895	92.451
1160	146.66	143.336	140.572	138.175	136.041	134.107	132.33	130.678	129.129	127.669	126.283	124.96	123.696	122.48	121.308	120.175	119.078	118.012	116.974	115.963	114.976	114.011	113.065	112.138	111.227	110.332	109.452	108.584	107.729	106.886	106.053	105.229	104.414	103.608	102.81	102.018	101.233	100.453	99.6796	98.9113	98.1467	97.3858	96.629	95.8759	95.125	94.3757	93.629	92.8847	92.1408
1165	146.584	143.251	140.48	138.076	135.936	133.996	132.213	130.556	129.002	127.538	126.147	124.821	123.551	122.331	121.154	120.017	118.916	117.846	116.804	115.789	114.797	113.828	112.878	111.946	111.032	110.133	109.248	108.376	107.517	106.669	105.831	105.004	104.184	103.373	102.57	101.774	100.985	100.2	99.4214	98.6476	97.8787	97.1132	96.3506	95.5915	94.8356	94.0818	93.3288	92.5777	91.8286
1170	146.509	143.166	140.388	137.976	135.832	133.886	132.097	130.435	128.876	127.407	126.011	124.681	123.406	122.182	121.001	119.86	118.754	117.679	116.634	115.614	114.619	113.645	112.691	111.755	110.836	109.933	109.044	108.168	107.304	106.452	105.61	104.778	103.954	103.139	102.331	101.53	100.735	99.947	99.1632	98.3839	97.6094	96.8392	96.0722	95.3071	94.545	93.7857	93.0285	92.2708	91.5146
1175	146.433	143.081	140.295	137.878	135.728	133.776	131.981	130.314	128.751	127.276	125.875	124.541	123.262	122.032	120.848	119.702	118.592	117.513	116.464	115.44	114.44	113.462	112.504	111.564	110.641	109.733	108.84	107.96	107.092	106.235	105.388	104.551	103.723	102.904	102.091	101.285	100.486	99.6921	98.9041	98.1203	97.3401	96.564	95.7918	95.0227	94.2544	93.4886	92.725	91.9634	91.2007
1180	146.357	142.996	140.203	137.78	135.623	133.666	131.866	130.193	128.625	127.145	125.74	124.401	123.117	121.884	120.695	119.545	118.43	117.347	116.293	115.265	114.261	113.279	112.316	111.372	110.445	109.533	108.635	107.751	106.879	106.018	105.167	104.325	103.492	102.668	101.851	101.041	100.236	99.4372	98.6438	97.8553	97.0708	96.2889	95.5106	94.7356	93.9634	93.1916	92.4213	91.6527	90.8854
1185	146.281	142.912	140.111	137.682	135.519	133.556	131.75	130.072	128.5	127.014	125.605	124.261	122.973	121.735	120.542	119.387	118.268	117.181	116.123	115.091	114.083	113.096	112.129	111.181	110.249	109.333	108.431	107.542	106.665	105.8	104.945	104.099	103.261	102.432	101.61	100.795	99.9864	99.1824	98.3834	97.5893	96.7996	96.0138	95.2295	94.4482	93.6696	92.8933	92.1176	91.342	90.5675
1190	146.205	142.829	140.019	137.584	135.415	133.446	131.635	129.951	128.374	126.884	125.47	124.121	122.829	121.587	120.389	119.23	118.107	117.015	115.953	114.916	113.904	112.913	111.942	110.99	110.054	109.133	108.227	107.333	106.452	105.582	104.722	103.872	103.03	102.196	101.369	100.549	99.7349	98.9269	98.1231	97.3233	96.5278	95.7361	94.9478	94.1609	93.3758	92.5928	91.8116	91.0314	90.2497
1195	146.129	142.745	139.928	137.486	135.31	133.336	131.52	129.831	128.248	126.754	125.335	123.981	122.685	121.438	120.236	119.072	117.945	116.849	115.783	114.742	113.725	112.73	111.755	110.798	109.858	108.933	108.022	107.124	106.239	105.364	104.499	103.644	102.798	101.96	101.128	100.303	99.4834	98.6699	97.8615	97.0573	96.256	95.4583	94.6638	93.8721	93.082	92.2924	91.5042	90.7172	89.9309
1200	146.053	142.662	139.837	137.388	135.206	133.226	131.405	129.711	128.123	126.624	125.2	123.842	122.541	121.29	120.083	118.915	117.784	116.684	115.612	114.567	113.546	112.547	111.567	110.606	109.661	108.732	107.817	106.915	106.025	105.146	104.277	103.417	102.565	101.722	100.886	100.056	99.2319	98.4129	97.5989	96.7894	95.984	95.1805	94.3798	93.5817	92.7858	91.9918	91.1968	90.4026	89.6088
1205	145.978	142.578	139.747	137.29	135.102	133.116	131.29	129.591	127.997	126.494	125.065	123.703	122.397	121.141	119.93	118.758	117.622	116.518	115.442	114.393	113.368	112.364	111.38	110.414	109.465	108.532	107.612	106.706	105.811	104.927	104.054	103.189	102.333	101.485	100.643	99.8088	98.9803	98.1559	97.3363	96.521	95.7096	94.9016	94.0957	93.2912	92.4887	91.6877	90.888	90.088	89.2868
1210	145.904	142.495	139.656	137.192	134.997	133.006	131.174	129.471	127.872	126.364	124.93	123.563	122.253	120.992	119.777	118.601	117.461	116.352	115.272	114.219	113.189	112.181	111.193	110.223	109.269	108.331	107.407	106.496	105.597	104.708	103.83	102.961	102.1	101.247	100.401	99.5607	98.7267	97.8981	97.0737	96.2525	95.4351	94.6209	93.8096	93.0007	92.1915	91.3837	90.5768	89.7704	88.9642
1215	145.829	142.411	139.565	137.094	134.894	132.897	131.059	129.351	127.748	126.234	124.796	123.424	122.109	120.844	119.625	118.444	117.299	116.186	115.102	114.044	113.01	111.998	111.005	110.031	109.073	108.13	107.202	106.286	105.382	104.489	103.606	102.732	101.867	101.009	100.158	99.3126	98.4731	97.6389	96.8093	95.9839	95.1606	94.3403	93.5225	92.7069	91.8931	91.0796	90.2655	89.4517	88.6377
1220	145.755	142.328	139.475	136.997	134.791	132.788	130.944	129.231	127.623	126.104	124.662	123.285	121.965	120.696	119.472	118.287	117.138	116.02	114.932	113.87	112.831	111.814	110.817	109.839	108.877	107.93	106.997	106.076	105.168	104.27	103.382	102.504	101.633	100.77	99.9145	99.0646	98.2196	97.3796	96.5442	95.7128	94.885	94.0596	93.2353	92.4131	91.5923	90.7727	89.9536	89.133	88.3112
1225	145.681	142.244	139.384	136.9	134.688	132.679	130.83	129.111	127.498	125.974	124.527	123.146	121.822	120.548	119.319	118.13	116.976	115.855	114.762	113.695	112.652	111.631	110.63	109.646	108.68	107.728	106.791	105.866	104.953	104.051	103.158	102.275	101.399	100.531	99.6699	98.815	97.9657	97.1204	96.2792	95.4418	94.6077	93.7764	92.9476	92.1193	91.2916	90.4648	89.6383	88.8117	87.9845
1230	145.607	142.161	139.293	136.803	134.585	132.571	130.716	128.991	127.373	125.845	124.393	123.007	121.678	120.4	119.167	117.973	116.815	115.689	114.592	113.521	112.473	111.448	110.442	109.454	108.483	107.527	106.585	105.656	104.738	103.831	102.934	102.046	101.165	100.292	99.4254	98.5649	97.71	96.8599	96.0141	95.1707	94.3304	93.4927	92.6572	91.8234	90.9908	90.1569	89.3229	88.4886	87.6534
1235	145.532	142.078	139.203	136.707	134.482	132.462	130.602	128.871	127.249	125.716	124.259	122.868	121.535	120.252	119.014	117.816	116.654	115.523	114.422	113.346	112.294	111.264	110.254	109.262	108.286	107.326	106.379	105.445	104.523	103.611	102.709	101.816	100.931	100.053	99.1808	98.3148	97.4542	96.5983	95.7466	94.8985	94.053	93.2089	92.3668	91.526	90.6862	89.847	89.0075	88.1655	87.3222
1240	145.458	141.994	139.112	136.61	134.379	132.353	130.488	128.752	127.124	125.586	124.125	122.729	121.392	120.104	118.862	117.659	116.492	115.357	114.251	113.172	112.116	111.081	110.067	109.07	108.09	107.125	106.173	105.234	104.307	103.39	102.483	101.585	100.695	99.812	98.9357	98.0647	97.1984	96.3367	95.479	94.6247	93.7733	92.9243	92.0763	91.2287	90.3817	89.535	88.6879	87.8401	86.9909
1245	145.384	141.912	139.021	136.513	134.276	132.244	130.374	128.633	126.999	125.457	123.99	122.591	121.248	119.956	118.71	117.503	116.331	115.192	114.081	112.997	111.937	110.898	109.879	108.877	107.893	106.923	105.967	105.024	104.092	103.17	102.258	101.355	100.459	99.5709	98.6891	97.813	96.9421	96.0751	95.2113	94.3508	93.4929	92.6373	91.7833	90.9305	90.0772	89.223	88.3682	87.5123	86.6548
1250	145.31	141.83	138.932	136.417	134.173	132.135	130.26	128.514	126.876	125.328	123.857	122.452	121.105	119.809	118.557	117.346	116.17	115.026	113.911	112.822	111.757	110.714	109.69	108.685	107.695	106.721	105.76	104.812	103.876	102.95	102.033	101.124	100.224	99.3299	98.4425	97.5608	96.684	95.8116	94.9431	94.0769	93.2126	92.3503	91.4894	90.6294	89.7697	88.9098	88.0485	87.1846	86.3186
1255	145.236	141.748	138.842	136.32	134.07	132.027	130.146	128.395	126.752	125.199	123.723	122.314	120.962	119.661	118.405	117.189	116.009	114.86	113.741	112.648	111.578	110.53	109.502	108.492	107.498	106.519	105.553	104.601	103.659	102.728	101.806	100.893	99.9878	99.0889	98.1959	97.3085	96.4259	95.5474	94.6726	93.8008	92.9315	92.0633	91.1955	90.3283	89.4612	88.5936	87.7249	86.8547	85.9823
1260	145.161	141.666	138.753	136.224	133.967	131.919	130.032	128.276	126.628	125.07	123.59	122.175	120.819	119.514	118.253	117.032	115.848	114.695	113.571	112.473	111.399	110.347	109.314	108.299	107.3	106.317	105.347	104.389	103.442	102.506	101.579	100.661	99.7504	98.8466	97.9489	97.0562	96.1677	95.2833	94.4022	93.524	92.6479	91.7736	90.9003	90.0272	89.1526	88.2773	87.4006	86.522	85.6409
1265	145.087	141.584	138.664	136.127	133.865	131.811	129.918	128.157	126.504	124.941	123.456	122.037	120.676	119.366	118.101	116.876	115.686	114.529	113.401	112.299	111.22	110.163	109.126	108.106	107.103	106.115	105.14	104.177	103.226	102.285	101.353	100.429	99.5129	98.6035	97.7002	96.8021	95.9087	95.0191	94.1318	93.2471	92.3644	91.4831	90.6027	89.7225	88.8419	87.9605	87.0764	86.1894	85.2996
1270	145.013	141.502	138.575	136.03	133.763	131.703	129.805	128.038	126.38	124.812	123.322	121.899	120.533	119.219	117.949	116.719	115.525	114.364	113.231	112.124	111.041	109.979	108.937	107.913	106.905	105.912	104.933	103.965	103.009	102.063	101.126	100.197	99.2754	98.3605	97.4515	96.5475	95.648	94.7524	93.8598	92.9699	92.0808	91.1926	90.305	89.4174	88.5292	87.6397	86.7484	85.8545	84.9575
1275	144.94	141.42	138.485	135.935	133.662	131.595	129.692	127.92	126.257	124.684	123.189	121.761	120.39	119.071	117.797	116.563	115.364	114.198	113.06	111.949	110.862	109.795	108.749	107.72	106.707	105.709	104.725	103.753	102.791	101.84	100.898	99.9646	99.038	98.1175	97.2027	96.2929	95.3874	94.4854	93.5865	92.6898	91.7948	90.901	90.0074	89.1124	88.2164	87.3189	86.4192	85.5167	84.6107
1280	144.867	141.338	138.396	135.839	133.56	131.488	129.579	127.801	126.133	124.556	123.055	121.623	120.248	118.924	117.645	116.406	115.203	114.032	112.89	111.774	110.682	109.611	108.56	107.526	106.509	105.506	104.517	103.54	102.573	101.617	100.67	99.7308	98.7989	97.8734	96.9536	96.0383	95.1267	94.2185	93.3131	92.4098	91.5079	90.6068	89.706	88.8046	87.9022	86.9981	86.0901	85.1789	84.2638
1285	144.795	141.256	138.307	135.744	133.458	131.38	129.466	127.683	126.009	124.427	122.922	121.485	120.105	118.776	117.493	116.25	115.042	113.867	112.72	111.599	110.503	109.427	108.371	107.333	106.311	105.303	104.309	103.327	102.356	101.394	100.442	99.497	98.5595	97.6283	96.7025	95.7816	94.8647	93.9511	93.0397	92.1297	91.2209	90.3127	89.4044	88.4954	87.585	86.6725	85.7572	84.8385	83.9156
1290	144.722	141.174	138.217	135.648	133.356	131.272	129.353	127.565	125.886	124.299	122.789	121.347	119.962	118.629	117.341	116.093	114.881	113.701	112.55	111.425	110.323	109.243	108.183	107.14	106.113	105.1	104.101	103.114	102.138	101.171	100.213	99.2631	98.3201	97.3831	96.4515	95.5245	94.6013	93.6813	92.7637	91.8478	90.9331	90.0186	89.1029	88.1861	87.2677	86.3469	85.423	84.4952	83.5629
1295	144.649	141.092	138.128	135.553	133.254	131.165	129.24	127.447	125.763	124.17	122.656	121.209	119.82	118.482	117.189	115.937	114.72	113.535	112.379	111.25	110.144	109.059	107.994	106.946	105.914	104.897	103.893	102.901	101.919	100.948	99.9846	99.0293	98.0807	97.138	96.2005	95.2674	94.3379	93.4114	92.4872	91.5644	90.6425	89.7208	88.7986	87.8751	86.9497	86.0213	85.0887	84.152	83.2102
1300	144.577	141.01	138.039	135.458	133.152	131.057	129.127	127.329	125.64	124.042	122.523	121.071	119.677	118.335	117.037	115.78	114.559	113.369	112.209	111.075	109.964	108.875	107.804	106.752	105.715	104.693	103.684	102.686	101.7	100.723	99.7545	98.7938	97.8399	96.8918	95.9489	95.0103	94.0746	93.1416	92.2106	91.281	90.352	89.4228	88.4929	87.5614	86.6277	85.691	84.7505	83.8055	82.855
1305	144.504	140.93	137.95	135.362	133.05	130.95	129.014	127.211	125.517	123.914	122.39	120.933	119.535	118.187	116.885	115.624	114.398	113.204	112.039	110.9	109.784	108.69	107.615	106.558	105.516	104.489	103.475	102.472	101.481	100.498	99.5244	98.558	97.5984	96.6444	95.6955	94.7506	93.8091	92.8703	91.9333	90.9976	90.0614	89.1248	88.1872	87.2477	86.3057	85.3603	84.4109	83.4564	82.4962
1310	144.431	140.849	137.862	135.267	132.949	130.843	128.901	127.093	125.394	123.786	122.257	120.796	119.392	118.04	116.734	115.467	114.237	113.038	111.868	110.725	109.604	108.505	107.426	106.363	105.317	104.285	103.266	102.258	101.261	100.274	99.2942	98.3223	97.3569	96.397	95.442	94.4908	93.5429	92.5974	91.6535	90.7106	89.7678	88.8244	87.8798	86.933	85.9834	85.0297	84.0712	83.1074	82.1374
1315	144.359	140.769	137.774	135.172	132.848	130.736	128.789	126.975	125.271	123.659	122.124	120.658	119.25	117.893	116.582	115.311	114.076	112.872	111.698	110.549	109.424	108.321	107.236	106.169	105.118	104.081	103.057	102.044	101.042	100.049	99.0641	98.0866	97.1154	96.1496	95.1885	94.2311	93.2767	92.3245	91.3737	90.4236	89.4734	88.5223	87.5697	86.6147	85.6564	84.6942	83.727	82.7542	81.7746
1320	144.286	140.688	137.687	135.076	132.748	130.63	128.677	126.857	125.148	123.531	121.991	120.521	119.108	117.746	116.43	115.154	113.914	112.707	111.527	110.374	109.245	108.136	107.047	105.975	104.919	103.876	102.847	101.829	100.821	99.8228	98.8326	97.8495	96.8727	95.9013	94.9343	93.971	93.0104	92.0515	91.0938	90.1366	89.179	88.2202	87.2596	86.2963	85.3294	84.3582	83.3817	82.399	81.4093
1325	144.213	140.607	137.599	134.981	132.647	130.523	128.565	126.74	125.025	123.403	121.859	120.383	118.965	117.599	116.279	114.998	113.753	112.541	111.357	110.199	109.065	107.951	106.857	105.78	104.718	103.671	102.637	101.613	100.6	99.5964	98.6005	97.6117	96.629	95.6514	94.6782	93.7084	92.7413	91.7759	90.8117	89.8476	88.883	87.917	86.9488	85.9775	85.0024	84.0222	83.0363	82.0439	81.044
1330	144.141	140.527	137.511	134.887	132.546	130.417	128.453	126.623	124.902	123.275	121.727	120.246	118.823	117.452	116.127	114.842	113.592	112.375	111.186	110.024	108.884	107.766	106.667	105.585	104.518	103.466	102.426	101.398	100.379	99.37	98.3685	97.3739	96.3852	95.4016	94.4221	93.4458	92.472	91.4997	90.5283	89.5568	88.5845	87.6105	86.6341	85.6542	84.6701	83.6809	82.6856	81.6832	80.6727
1335	144.068	140.446	137.423	134.793	132.446	130.31	128.341	126.505	124.78	123.148	121.594	120.108	118.681	117.306	115.975	114.685	113.431	112.209	111.016	109.848	108.704	107.581	106.477	105.39	104.318	103.261	102.216	101.182	100.159	99.1436	98.1365	97.1361	96.1415	95.1518	94.1659	93.1832	92.2027	91.2235	90.2449	89.266	88.2861	87.3041	86.3193	85.3309	84.3378	83.3393	82.3342	81.3217	80.3005
1340	143.995	140.366	137.335	134.699	132.345	130.203	128.228	126.388	124.658	123.02	121.462	119.971	118.539	117.159	115.824	114.529	113.27	112.043	110.845	109.673	108.524	107.396	106.287	105.195	104.118	103.056	102.006	100.966	99.9371	98.9165	97.9036	96.8974	95.8968	94.9009	93.9088	92.9197	91.9326	90.9467	89.9611	88.9749	87.9874	86.9976	86.0046	85.0076	84.0056	82.9976	81.9826	80.9594	79.927
1345	143.924	140.285	137.247	134.604	132.244	130.097	128.116	126.271	124.536	122.893	121.33	119.834	118.397	117.012	115.672	114.373	113.109	111.877	110.674	109.497	108.343	107.21	106.097	105	103.918	102.85	101.794	100.749	99.7145	98.6883	97.6696	96.6574	95.6507	94.6485	93.6499	92.6541	91.6601	90.667	89.674	88.6802	87.6847	86.6866	85.6851	84.6791	83.6678	82.65	81.6249	80.5911	79.5477
1350	143.853	140.205	137.159	134.51	132.143	129.99	128.004	126.153	124.413	122.766	121.197	119.697	118.255	116.865	115.52	114.216	112.948	111.711	110.503	109.322	108.163	107.025	105.906	104.804	103.717	102.643	101.582	100.532	99.4919	98.46	97.4355	96.4174	95.4045	94.3961	93.391	92.3885	91.3875	90.3873	89.3869	88.3854	87.3819	86.3756	85.3655	84.3506	83.3299	82.3025	81.2671	80.2228	79.1684
1355	143.782	140.124	137.071	134.416	132.043	129.884	127.893	126.036	124.291	122.639	121.065	119.56	118.113	116.718	115.369	114.06	112.786	111.545	110.333	109.146	107.982	106.839	105.715	104.608	103.516	102.437	101.371	100.315	99.2693	98.2318	97.2015	96.1774	95.1584	94.1437	93.1321	92.1229	91.115	90.1076	89.0998	88.0906	87.0792	86.0646	85.0459	84.022	82.9919	81.9541	80.9078	79.8518	78.7848
1360	143.711	140.043	136.983	134.322	131.943	129.779	127.782	125.919	124.169	122.511	120.933	119.423	117.971	116.571	115.217	113.903	112.625	111.379	110.162	108.97	107.801	106.653	105.524	104.412	103.314	102.231	101.159	100.098	99.0468	98.0035	96.9671	95.9368	94.9114	93.89	92.8717	91.8555	90.8405	89.8256	88.8101	87.7929	86.7731	85.7497	84.7218	83.6883	82.6481	81.6002	80.5434	79.4763	78.3979
1365	143.639	139.963	136.896	134.228	131.843	129.673	127.67	125.803	124.047	122.384	120.801	119.285	117.829	116.425	115.066	113.747	112.464	111.213	109.991	108.794	107.62	106.467	105.333	104.216	103.113	102.024	100.947	99.8802	98.8227	97.7733	96.7309	95.6944	94.6627	93.6349	92.6099	91.5867	90.5645	89.5423	88.5191	87.4939	86.4658	85.4339	84.397	83.3542	82.3044	81.2464	80.179	79.1009	78.0109
1370	143.568	139.884	136.81	134.134	131.743	129.567	127.559	125.686	123.925	122.257	120.669	119.148	117.687	116.278	114.914	113.591	112.303	111.047	109.82	108.618	107.439	106.281	105.142	104.02	102.912	101.817	100.734	99.6615	98.5983	97.5431	96.4947	95.452	94.4141	93.3797	92.348	91.3179	90.2886	89.2589	88.228	87.1949	86.1586	85.1181	84.0723	83.0202	81.9599	80.8905	79.811	78.72	77.6162
1375	143.497	139.805	136.723	134.039	131.643	129.462	127.448	125.57	123.803	122.13	120.537	119.011	117.546	116.131	114.763	113.434	112.142	110.881	109.649	108.442	107.258	106.095	104.951	103.823	102.709	101.609	100.521	99.4428	98.3739	97.3129	96.2585	95.2097	94.1654	93.1245	92.0861	91.0491	90.0126	88.9752	87.9361	86.8943	85.849	84.799	83.7433	82.6806	81.61	80.53	79.4395	78.3371	77.2213
1380	143.426	139.726	136.636	133.946	131.544	129.356	127.337	125.453	123.681	122.003	120.405	118.875	117.404	115.985	114.611	113.278	111.98	110.714	109.477	108.266	107.077	105.909	104.759	103.626	102.507	101.401	100.308	99.2241	98.1495	97.0826	96.0223	94.967	93.9158	92.8679	91.8221	90.7775	89.7332	88.6879	87.6408	86.5909	85.537	84.4781	83.413	82.3408	81.26	80.1696	79.0681	77.9532	76.8226
1385	143.354	139.646	136.549	133.853	131.444	129.25	127.225	125.337	123.56	121.876	120.273	118.738	117.262	115.838	114.459	113.121	111.819	110.548	109.306	108.09	106.896	105.722	104.567	103.428	102.305	101.194	100.094	99.0053	97.9244	96.851	95.784	94.7221	93.6644	92.6098	91.5571	90.5054	89.4536	88.4007	87.3456	86.2874	85.2249	84.1571	83.0828	82.0009	80.9084	79.8054	78.6906	77.5624	76.4192
1390	143.283	139.567	136.463	133.76	131.344	129.144	127.114	125.22	123.438	121.75	120.141	118.601	117.12	115.691	114.308	112.965	111.657	110.382	109.135	107.913	106.714	105.535	104.375	103.231	102.102	100.986	99.8804	98.7849	97.698	96.6186	95.5454	94.4773	93.413	92.3517	91.292	90.2332	89.174	88.1134	87.0504	85.9837	84.9115	83.8334	82.7483	81.6549	80.5519	79.438	78.3117	77.1715	76.0158
1395	143.212	139.488	136.376	133.667	131.245	129.039	127.003	125.104	123.317	121.623	120.009	118.464	116.978	115.545	114.156	112.808	111.496	110.215	108.964	107.737	106.532	105.349	104.183	103.034	101.899	100.777	99.6656	98.5644	97.4717	96.3863	95.3069	94.2324	93.1617	92.0936	91.027	89.9605	88.8929	87.8236	86.7515	85.6755	84.5944	83.5071	82.4123	81.3089	80.1954	79.0705	77.9314	76.7759	75.6039
1400	143.141	139.409	136.289	133.574	131.145	128.934	126.892	124.987	123.195	121.497	119.878	118.328	116.837	115.398	114.005	112.652	111.334	110.049	108.792	107.56	106.351	105.162	103.991	102.836	101.695	100.568	99.4508	98.3438	97.2453	96.1539	95.0684	93.9874	92.9093	91.8335	90.759	89.6847	88.6095	87.5322	86.4519	85.3673	84.2773	83.1807	82.0763	80.9621	79.8358	78.6971	77.5447	76.3767	75.1916
1405	143.07	139.329	136.203	133.481	131.045	128.829	126.782	124.871	123.073	121.37	119.746	118.191	116.695	115.251	113.853	112.495	111.173	109.883	108.62	107.383	106.169	104.975	103.798	102.638	101.492	100.358	99.236	98.1233	97.0189	95.9208	94.8281	93.7399	92.655	91.5723	90.4906	89.4089	88.326	87.2408	86.1523	85.0591	83.9596	82.8519	81.7357	80.6097	79.4724	78.3223	77.1579	75.977	74.7742
1410	142.998	139.25	136.116	133.388	130.946	128.724	126.671	124.755	122.952	121.243	119.615	118.054	116.554	115.105	113.702	112.339	111.012	109.716	108.448	107.206	105.987	104.787	103.605	102.44	101.288	100.149	99.0212	97.902	96.7907	95.6861	94.5871	93.4923	92.4007	91.3111	90.2222	89.1331	88.0426	86.9487	85.8503	84.7469	83.6372	82.5198	81.3936	80.2572	79.109	77.9464	76.7663	75.5689	74.3525
1415	142.929	139.171	136.029	133.294	130.847	128.619	126.561	124.639	122.831	121.117	119.483	117.918	116.412	114.958	113.55	112.182	110.85	109.549	108.277	107.03	105.805	104.599	103.412	102.241	101.084	99.9395	98.8048	97.6795	96.5622	95.4515	94.3461	93.2448	92.1465	91.0499	89.9533	88.8554	87.7557	86.6529	85.546	84.4337	83.3148	82.1878	81.0516	79.9028	78.7405	77.5639	76.3713	75.1609	73.9291
1420	142.859	139.092	135.943	133.201	130.749	128.514	126.45	124.524	122.71	120.99	119.352	117.781	116.271	114.812	113.399	112.026	110.688	109.382	108.105	106.852	105.622	104.412	103.219	102.043	100.88	99.7287	98.5883	97.4571	96.3337	95.2168	94.1051	92.9972	91.8909	90.786	89.6814	88.5758	87.4681	86.3572	85.2417	84.1206	82.9922	81.8532	80.7041	79.5435	78.3698	77.1813	75.9757	74.7472	73.4974
1425	142.789	139.012	135.858	133.108	130.65	128.41	126.34	124.408	122.589	120.864	119.22	117.645	116.129	114.665	113.247	111.869	110.526	109.216	107.933	106.675	105.439	104.224	103.026	101.844	100.675	99.5179	98.3718	97.2347	96.1053	94.982	93.8626	92.7469	91.6336	90.5215	89.4095	88.2962	87.1806	86.0615	84.9364	83.8042	82.6642	81.5152	80.3557	79.1842	77.9991	76.7944	75.572	74.3298	73.0657
1430	142.719	138.934	135.772	133.015	130.551	128.305	126.229	124.292	122.468	120.738	119.089	117.508	115.987	114.519	113.095	111.712	110.365	109.049	107.761	106.498	105.257	104.036	102.832	101.644	100.47	99.3071	98.1552	97.0122	95.8756	94.7449	93.619	92.4965	91.3763	90.257	89.1375	88.0167	86.8915	85.7621	84.6272	83.4857	82.3362	81.1772	80.0073	78.8214	77.6207	76.4037	75.1682	73.9104	72.6252
1435	142.649	138.856	135.686	132.923	130.453	128.2	126.119	124.176	122.347	120.612	118.957	117.372	115.846	114.372	112.944	111.555	110.203	108.882	107.588	106.32	105.074	103.848	102.638	101.444	100.264	99.0964	97.9381	96.7879	95.6449	94.5078	93.3753	92.2461	91.1189	89.9924	88.8638	87.7333	86.5997	85.4617	84.318	83.1673	82.0082	80.8362	79.6522	78.4549	77.2424	76.0129	74.7591	73.4832	72.183
1440	142.579	138.778	135.601	132.831	130.354	128.095	126.008	124.06	122.226	120.486	118.826	117.235	115.704	114.225	112.792	111.399	110.041	108.715	107.416	106.143	104.891	103.659	102.444	101.245	100.059	98.8846	97.7197	96.5634	95.4142	94.2707	93.1317	91.9957	90.8599	89.7244	88.5881	87.4497	86.3079	85.1614	84.0088	82.8463	81.6744	80.4918	79.2971	78.0884	76.8611	75.6138	74.3461	73.056	71.7343
1445	142.509	138.7	135.515	132.739	130.255	127.99	125.899	123.945	122.104	120.359	118.695	117.099	115.563	114.079	112.64	111.242	109.879	108.547	107.244	105.965	104.708	103.47	102.25	101.045	99.853	98.6721	97.5013	96.3389	95.1835	94.0337	92.8868	91.7423	90.5993	89.4565	88.3125	87.1661	86.0161	84.8588	83.6946	82.5223	81.3404	80.1475	78.9407	77.7161	76.4747	75.2144	73.9316	72.6197	71.281
1450	142.44	138.622	135.43	132.647	130.156	127.886	125.789	123.829	121.984	120.233	118.564	116.962	115.421	113.932	112.489	111.085	109.717	108.38	107.071	105.787	104.524	103.281	102.056	100.845	99.6463	98.4596	97.2828	96.1144	94.9523	93.7944	92.6404	91.4889	90.3387	89.1885	88.0369	86.8808	85.72	84.5536	83.3802	82.1983	81.0065	79.7994	78.5784	77.342	76.0882	74.8108	73.5089	72.1821	70.8233
1455	142.37	138.544	135.344	132.555	130.058	127.782	125.679	123.714	121.863	120.107	118.432	116.826	115.28	113.786	112.337	110.928	109.555	108.213	106.899	105.609	104.341	103.093	101.861	100.644	99.4396	98.2471	97.0644	95.8888	94.7192	93.5547	92.3939	91.2355	90.0782	88.9194	87.7578	86.593	85.4237	84.2484	83.0658	81.8721	80.6664	79.4484	78.2161	76.9672	75.6952	74.4023	73.0862	71.7381	70.3583
1460	142.3	138.466	135.258	132.463	129.959	127.678	125.569	123.599	121.742	119.981	118.301	116.69	115.138	113.639	112.185	110.771	109.393	108.046	106.726	105.431	104.157	102.903	101.665	100.443	99.2329	98.0346	96.8445	95.6621	94.4861	93.315	92.1475	90.9819	89.8152	88.6477	87.4782	86.3052	85.1273	83.9422	82.7471	81.5423	80.3263	79.0974	77.8508	76.5851	75.3002	73.9936	72.6553	71.2895	69.8904
1465	142.23	138.388	135.173	132.371	129.861	127.574	125.459	123.484	121.622	119.855	118.17	116.554	114.997	113.492	112.034	110.614	109.231	107.878	106.553	105.252	103.974	102.713	101.47	100.242	99.0262	97.8205	96.6241	95.4354	94.253	93.0754	91.8999	90.7254	89.5512	88.3761	87.1986	86.0173	84.8282	83.6319	82.4272	81.2125	79.9858	78.7413	77.481	76.203	74.903	73.5754	72.2223	70.8368	69.413
1470	142.16	138.31	135.087	132.279	129.764	127.47	125.35	123.368	121.501	119.73	118.039	116.417	114.856	113.346	111.882	110.457	109.068	107.71	106.38	105.074	103.789	102.523	101.274	100.041	98.818	97.6062	96.4036	95.2087	94.0199	92.8338	91.6505	90.4688	89.2872	88.1044	86.9178	85.7253	84.5271	83.3216	82.1073	80.8804	79.6391	78.3833	77.1112	75.817	74.499	73.1573	71.784	70.3766	68.9339
1475	142.09	138.232	135.002	132.187	129.666	127.366	125.24	123.253	121.381	119.604	117.908	116.281	114.714	113.199	111.73	110.3	108.906	107.542	106.207	104.895	103.605	102.333	101.079	99.8383	98.6096	97.3918	96.1832	94.9818	93.7845	92.5914	91.4011	90.2122	89.0232	87.8303	86.634	85.433	84.226	83.0113	81.7836	80.5445	79.2923	78.0253	76.7359	75.4264	74.095	72.7328	71.3402	69.9142	68.4433
1480	142.02	138.154	134.917	132.095	129.568	127.262	125.13	123.138	121.26	119.478	117.777	116.145	114.573	113.053	111.578	110.143	108.743	107.375	106.034	104.716	103.42	102.144	100.883	99.6357	98.4012	97.1775	95.9623	94.7528	93.5488	92.349	91.1517	89.955	88.7559	87.5548	86.3502	85.1407	83.9236	82.6958	81.458	80.2085	78.9444	77.6604	76.3582	75.0358	73.6836	72.3045	70.8936	69.4417	67.9514
1485	141.951	138.076	134.833	132.003	129.47	127.158	125.02	123.023	121.14	119.352	117.646	116.009	114.431	112.906	111.426	109.986	108.581	107.207	105.86	104.537	103.236	101.953	100.686	99.4332	98.1928	96.9627	95.7397	94.5237	93.3132	92.1066	90.9011	89.6951	88.4883	87.2792	86.0664	84.846	83.6174	82.38	81.1323	79.87	78.5907	77.2949	75.9801	74.6372	73.2701	71.873	70.4383	68.9684	67.447
1490	141.883	137.998	134.748	131.911	129.372	127.054	124.911	122.908	121.019	119.227	117.515	115.872	114.29	112.759	111.274	109.829	108.418	107.039	105.686	104.358	103.051	101.762	100.489	99.2306	97.9843	96.7464	95.5171	94.2947	93.0776	91.8625	90.6486	89.4351	88.2206	87.0036	85.7793	84.549	83.3112	82.0643	80.8031	79.5276	78.237	76.928	75.594	74.2377	72.8531	71.434	69.9825	68.4829	66.9409
1495	141.814	137.921	134.664	131.82	129.274	126.951	124.802	122.793	120.899	119.101	117.384	115.736	114.148	112.613	111.122	109.671	108.256	106.871	105.513	104.179	102.866	101.571	100.292	99.028	97.7741	96.5301	95.2945	94.0657	92.8401	91.6172	90.3961	89.1752	87.9523	86.724	85.4911	84.2519	83.005	81.7441	80.4713	79.1851	77.8809	76.5547	75.2079	73.8344	72.4295	70.9948	69.515	67.9974	66.4217
1500	141.746	137.844	134.579	131.729	129.177	126.847	124.693	122.678	120.779	118.975	117.253	115.6	114.007	112.466	110.97	109.514	108.093	106.702	105.339	104	102.68	101.38	100.096	98.8241	97.5638	96.3137	95.0719	93.8348	92.6018	91.3719	90.1435	88.914	87.6809	86.4443	85.2029	83.9542	82.6936	81.4227	80.1396	78.8394	77.5199	76.1814	74.8178	73.4255	72.0058	70.5443	69.0475	67.4981	65.8996
1505	141.677	137.767	134.494	131.638	129.079	126.744	124.584	122.564	120.659	118.85	117.122	115.464	113.866	112.319	110.818	109.356	107.93	106.534	105.165	103.82	102.495	101.189	99.898	98.6199	97.3536	96.0974	94.8477	93.6033	92.3635	91.1265	89.8896	88.6505	87.4094	86.1646	84.9133	83.6522	82.3821	81.1012	79.8042	78.4901	77.1588	75.8039	74.4229	73.0166	71.5718	70.0939	68.5685	66.9989	65.3648
1510	141.608	137.69	134.41	131.547	128.981	126.641	124.475	122.449	120.539	118.724	116.991	115.328	113.724	112.172	110.666	109.199	107.767	106.365	104.991	103.64	102.309	100.997	99.6997	98.4156	97.1434	95.8798	94.6228	93.3718	92.1251	90.8797	89.6337	88.387	87.1379	85.8832	84.6205	83.3502	82.0705	80.7757	79.466	78.1407	76.7935	75.4224	74.0281	72.5982	71.1375	69.6339	68.0881	66.4851	64.8247
1515	141.54	137.614	134.325	131.456	128.884	126.538	124.366	122.334	120.418	118.599	116.86	115.192	113.583	112.026	110.514	109.042	107.604	106.197	104.817	103.46	102.124	100.805	99.5013	98.2114	96.9326	95.6614	94.3978	93.1402	91.8854	90.6313	89.3778	88.1234	86.8645	85.5991	84.3276	83.0482	81.7547	80.4483	79.1279	77.7871	76.4247	75.0409	73.6245	72.1794	70.6956	69.1715	67.5967	65.9704	64.2734
1520	141.471	137.537	134.241	131.365	128.787	126.434	124.257	122.22	120.298	118.473	116.73	115.055	113.441	111.879	110.361	108.884	107.441	106.029	104.642	103.28	101.938	100.612	99.303	98.0072	96.7204	95.4429	94.1729	92.9076	91.6442	90.3829	89.122	87.8579	86.5889	85.3151	84.0348	82.7417	81.4375	80.1208	78.7855	77.4305	76.0559	74.6516	73.2203	71.7545	70.2501	68.701	67.1027	65.4411	63.7131
1525	141.403	137.46	134.156	131.274	128.69	126.331	124.147	122.105	120.178	118.348	116.599	114.919	113.3	111.732	110.209	108.726	107.278	105.859	104.467	103.099	101.751	100.42	99.1047	97.8013	96.5083	95.2244	93.9474	92.6734	91.403	90.1345	88.8643	87.5906	86.3134	85.0311	83.7376	82.4345	81.1204	79.7894	78.4406	77.0739	75.6803	74.2614	72.8117	71.3252	69.7994	68.2259	66.5973	64.9091	63.1441
1530	141.334	137.383	134.072	131.183	128.593	126.228	124.038	121.99	120.058	118.222	116.468	114.783	113.158	111.585	110.057	108.568	107.114	105.69	104.293	102.919	101.564	100.227	98.9056	97.5953	96.2961	95.006	93.7201	92.4392	91.1618	89.8845	88.6049	87.3233	86.0379	84.743	83.4398	82.1272	80.7996	79.4557	78.0957	76.7113	75.3033	73.8681	72.3977	70.8931	69.3421	67.7436	66.0889	64.3634	62.5612
1535	141.265	137.306	133.987	131.092	128.496	126.125	123.93	121.876	119.938	118.097	116.337	114.647	113.017	111.438	109.905	108.41	106.951	105.521	104.118	102.738	101.377	100.035	98.7057	97.3893	96.0839	94.7853	93.4927	92.205	90.9196	89.6328	88.3455	87.0559	85.7586	84.4543	83.1421	81.8167	80.4765	79.1219	77.7456	76.3471	74.9247	73.4687	71.9832	70.4527	68.8816	67.255	65.5679	63.812	61.9726
1540	141.197	137.229	133.904	131.001	128.399	126.021	123.821	121.762	119.818	117.972	116.207	114.511	112.875	111.291	109.752	108.253	106.787	105.352	103.943	102.557	101.19	99.8411	98.5057	97.1833	95.8705	94.5646	93.2653	91.9705	90.6753	89.3812	88.0862	86.7855	85.4788	84.1657	82.8416	81.5039	80.1534	78.7839	77.3935	75.9825	74.5392	73.0693	71.5588	70.0122	68.4116	66.7595	65.0443	63.2489	61.3651
1545	141.128	137.152	133.82	130.91	128.302	125.919	123.712	121.648	119.699	117.846	116.076	114.375	112.734	111.144	109.6	108.095	106.623	105.183	103.768	102.375	101.004	99.6471	98.3058	96.9771	95.6563	94.3438	93.0379	91.7335	90.4311	89.1295	87.8243	86.5142	85.199	83.875	82.5386	81.1911	79.8271	78.4434	77.0414	75.6102	74.1537	72.6618	71.1344	69.5603	67.94	66.2566	64.5057	62.6755	60.749
1550	141.06	137.075	133.737	130.82	128.205	125.816	123.604	121.533	119.579	117.721	115.945	114.239	112.592	110.997	109.447	107.937	106.46	105.013	103.592	102.194	100.816	99.4531	98.1058	96.7692	95.442	94.1231	92.8084	91.4965	90.1869	88.8761	87.5612	86.2428	84.9179	83.5816	82.2357	80.876	79.4978	78.103	76.6827	75.238	73.7627	72.2526	70.7025	69.1081	67.4568	65.7463	63.9647	62.0939	60.1203
1555	140.991	136.999	133.653	130.73	128.108	125.713	123.495	121.419	119.459	117.596	115.814	114.103	112.45	110.85	109.295	107.778	106.296	104.843	103.416	102.013	100.627	99.2591	97.9051	96.5613	95.2278	93.9013	92.5784	91.2595	89.9419	88.6209	87.2981	85.9711	84.6336	83.2881	81.9315	80.5574	79.1684	77.7576	76.3231	74.8626	73.3681	71.8396	70.2671	68.6464	66.9727	65.2283	63.4076	61.4957	59.4733
1560	140.924	136.923	133.57	130.64	128.011	125.611	123.387	121.305	119.339	117.471	115.684	113.966	112.309	110.703	109.142	107.62	106.132	104.673	103.241	101.831	100.439	99.0651	97.7034	96.3534	95.0135	93.6782	92.3484	91.0224	89.6944	88.3658	87.035	85.6956	84.3493	82.9946	81.6231	80.2387	78.8359	77.4101	75.9627	74.4819	72.9728	71.4202	69.8272	68.1818	66.4754	64.7012	62.8455	60.8908	58.8154
1565	140.856	136.847	133.486	130.549	127.915	125.508	123.278	121.191	119.22	117.346	115.553	113.83	112.167	110.556	108.989	107.461	105.968	104.503	103.065	101.648	100.251	98.8701	97.5017	96.1455	94.7972	93.4551	92.1184	90.7827	89.4469	88.1106	86.7685	85.42	84.0649	82.696	81.3147	79.9185	78.5	77.0626	75.5951	74.1011	72.5686	71.0007	69.3802	67.7091	65.9773	64.1672	62.27	60.2685	58.14
1570	140.789	136.771	133.403	130.459	127.818	125.406	123.17	121.076	119.1	117.22	115.422	113.694	112.026	110.409	108.836	107.303	105.804	104.333	102.889	101.466	100.063	98.6745	97.3	95.937	94.5808	93.2319	91.8871	90.5427	89.1995	87.8534	86.5015	85.1445	83.7769	82.3974	81.0063	79.5937	78.1641	76.709	75.2276	73.7137	72.1644	70.5705	68.9314	67.2313	65.465	63.6214	61.6842	59.6336	57.4442
1575	140.722	136.695	133.319	130.369	127.722	125.303	123.061	120.962	118.98	117.095	115.292	113.558	111.884	110.261	108.683	107.145	105.639	104.163	102.712	101.284	99.8738	98.4789	97.0984	95.7271	94.3643	93.0088	91.6544	90.3027	88.9513	87.5946	86.2344	84.8669	83.4878	82.0989	80.6922	79.2689	77.8246	76.3541	74.8568	73.324	71.7542	70.1402	68.4721	66.7462	64.9512	63.0702	61.0893	58.9886	56.7331
1580	140.654	136.62	133.236	130.279	127.626	125.2	122.953	120.849	118.861	116.97	115.161	113.422	111.742	110.114	108.53	106.986	105.474	103.993	102.536	101.101	99.6843	98.2833	96.8957	95.5171	94.1478	92.7832	91.4216	90.0627	88.7005	87.3357	85.9669	84.5869	83.1987	81.7967	80.3781	78.9429	77.4817	75.9991	74.4809	72.9327	71.3398	69.7022	68.0128	66.2545	64.423	62.5033	60.4767	58.3202	56.0045
1585	140.587	136.544	133.152	130.189	127.529	125.098	122.845	120.735	118.741	116.845	115.03	113.286	111.6	109.967	108.377	106.827	105.31	103.822	102.359	100.918	99.4947	98.0878	96.6922	95.3072	93.9306	92.5575	91.1889	89.8204	88.4496	87.0769	85.6957	84.3069	82.908	81.4927	80.0639	78.6116	77.1388	75.6363	74.1049	72.5334	70.9235	69.2605	67.5408	65.7556	63.8914	61.9318	59.8561	57.6385	55.2467
1590	140.519	136.468	133.069	130.098	127.433	124.995	122.737	120.621	118.622	116.72	114.9	113.149	111.459	109.819	108.224	106.668	105.145	103.651	102.182	100.735	99.3051	97.8912	96.4886	95.0973	93.7118	92.3318	90.9556	89.5772	88.1987	86.8154	85.4245	84.0269	82.6139	81.1888	79.7449	78.2803	76.7916	75.2735	73.7226	72.1342	70.4984	68.8137	67.0685	65.249	63.3463	61.3432	59.2183	56.9425	54.4674
1595	140.452	136.392	132.985	130.008	127.337	124.893	122.629	120.507	118.502	116.595	114.769	113.013	111.317	109.672	108.072	106.509	104.981	103.48	102.006	100.551	99.1155	97.694	96.2851	94.8862	93.493	92.1061	90.7199	89.3341	87.9471	86.5527	85.1533	83.7427	82.3198	80.8826	79.4246	77.9479	76.4414	74.9087	73.3378	71.7283	70.0733	68.3599	66.5844	64.7344	62.7947	60.7462	58.565	56.2214	53.6641
1600	140.384	136.316	132.903	129.919	127.241	124.791	122.521	120.393	118.383	116.47	114.639	112.877	111.175	109.524	107.918	106.35	104.815	103.309	101.828	100.367	98.9253	97.4967	96.0815	94.6741	93.2742	91.879	90.4842	89.0909	87.6927	86.29	84.8803	83.458	82.0256	80.573	79.1043	77.6097	76.0912	74.5376	72.9518	71.3191	69.6389	67.9033	66.0982	64.2122	62.2317	60.1371	57.9	55.4802	52.8338
1605	140.317	136.241	132.82	129.829	127.144	124.689	122.413	120.279	118.263	116.345	114.508	112.741	111.033	109.377	107.765	106.191	104.65	103.138	101.65	100.184	98.7342	97.2994	95.8768	94.4619	93.0553	91.6505	90.2485	88.8456	87.4382	86.0273	84.6047	83.1733	81.7266	80.2634	78.7798	77.2715	75.7352	74.1666	72.5576	70.9075	69.2025	67.4365	65.6005	63.68	61.6575	59.5111	57.2134	54.7188	51.9729
1610	140.25	136.165	132.737	129.74	127.048	124.587	122.305	120.166	118.144	116.22	114.377	112.604	110.891	109.229	107.611	106.032	104.485	102.967	101.472	100	98.5431	97.1021	95.6712	94.2498	92.8346	91.4221	90.0128	88.5991	87.1837	85.761	84.3291	82.8867	81.4272	79.9528	78.4531	76.9319	75.3773	73.7907	72.1635	70.4877	68.7596	66.9689	65.0997	63.1411	61.0755	58.8758	56.5084	53.9348	51.0742
1615	140.182	136.089	132.655	129.65	126.952	124.485	122.197	120.052	118.024	116.095	114.247	112.468	110.749	109.082	107.458	105.872	104.319	102.795	101.295	99.8149	98.3519	96.9039	95.4657	94.0377	92.6133	91.1937	89.7742	88.3526	86.9282	85.4942	84.0536	82.5971	81.1278	79.6372	78.1264	76.5865	75.0193	73.4109	71.7635	70.0678	68.3112	66.4885	64.5865	62.589	60.4758	58.2215	55.7866	53.12	50.1369
1620	140.115	136.013	132.572	129.561	126.857	124.383	122.089	119.938	117.905	115.97	114.116	112.332	110.607	108.934	107.304	105.713	104.154	102.623	101.117	99.6298	98.1608	96.7048	95.2601	93.8237	92.392	90.9649	89.5354	88.1061	86.6699	85.2275	83.7743	82.3075	80.8251	79.3216	77.7956	76.241	74.6536	73.031	71.3594	69.6386	67.8589	66.0081	64.0703	62.0324	59.8689	57.5508	55.0444	52.2745	49.1572
1625	140.047	135.938	132.49	129.472	126.761	124.281	121.981	119.825	117.786	115.845	113.985	112.196	110.465	108.786	107.151	105.553	103.989	102.451	100.938	99.4448	97.9694	96.5057	95.0546	93.6093	92.1707	90.7336	89.2966	87.8576	86.4117	84.9601	83.4941	82.0178	80.5201	79.0059	77.4621	75.8933	74.2875	72.6427	70.9542	69.2076	67.3977	65.5135	63.5398	61.458	59.2449	56.8667	54.2731	51.3976	48.1298
1630	139.98	135.863	132.407	129.382	126.665	124.179	121.873	119.711	117.667	115.72	113.855	112.059	110.323	108.638	106.997	105.393	103.822	102.279	100.759	99.2597	97.7766	96.3066	94.8475	93.3949	91.9487	90.5023	89.0578	87.6076	86.1534	84.689	83.2139	81.7233	80.215	78.6841	77.1287	75.5402	73.9195	72.2537	70.5397	68.7704	66.9347	65.0186	63.0071	60.8784	58.6069	56.1609	53.4786	50.4851	47.048
1635	139.914	135.789	132.324	129.293	126.57	124.077	121.766	119.598	117.548	115.595	113.724	111.923	110.181	108.49	106.843	105.233	103.656	102.107	100.58	99.0746	97.5838	96.1075	94.6398	93.1804	91.7247	90.271	88.8166	87.3575	85.8935	84.4179	82.9326	81.4284	79.9082	78.3621	76.7909	75.1872	73.5447	71.8612	70.1252	68.3275	66.4601	64.509	62.457	60.2828	57.9584	55.4332	52.658	49.5325	45.8992
1640	139.848	135.714	132.242	129.203	126.474	123.975	121.658	119.484	117.428	115.47	113.593	111.787	110.039	108.342	106.689	105.074	103.49	101.934	100.401	98.8887	97.391	95.9075	94.4321	92.9656	91.5007	90.0397	88.5745	87.1075	85.6312	84.1468	82.6475	81.1336	79.5973	78.0402	76.4503	74.8303	73.1699	71.4624	69.7029	67.8813	65.9851	63.9988	61.9036	59.676	57.2867	54.6864	51.8078	48.5344	44.6732
1645	139.781	135.639	132.159	129.114	126.379	123.874	121.55	119.371	117.309	115.345	113.463	111.65	109.897	108.194	106.535	104.914	103.324	101.761	100.222	98.7021	97.1982	95.7064	94.2244	92.7487	91.2767	89.8059	88.3324	86.8553	85.3689	83.8737	82.3624	80.8357	79.2863	77.7124	76.1097	74.4692	72.7902	71.0636	69.2773	67.4259	65.4962	63.4724	61.3348	59.0591	56.6	53.9183	50.9244	47.4846	43.3614
1650	139.715	135.564	132.076	129.025	126.283	123.773	121.443	119.257	117.19	115.22	113.332	111.514	109.755	108.046	106.381	104.753	103.157	101.588	100.043	98.5155	97.0054	95.5053	94.0168	92.5319	91.0527	89.5716	88.0903	86.6015	85.1066	83.598	82.0774	80.5353	78.9749	77.3837	75.764	74.108	72.4063	70.656	68.8477	66.9696	65.0073	62.9441	60.7577	58.4215	55.898	53.1208	50.0031	46.3761	41.9479
1655	139.649	135.489	131.994	128.936	126.187	123.671	121.335	119.144	117.071	115.095	113.202	111.377	109.612	107.898	106.227	104.592	102.991	101.415	99.863	98.3289	96.8109	95.3043	93.807	92.315	90.8266	89.3372	87.8461	86.3477	84.8419	83.3224	81.7886	80.2349	78.6577	77.0551	75.4159	73.7409	72.0224	70.2469	68.4104	66.5008	64.5035	62.4003	60.169	57.7735	55.1719	52.2934	49.0375	45.2005	40.3902
1660	139.582	135.415	131.912	128.847	126.092	123.57	121.228	119.03	116.951	114.97	113.071	111.241	109.47	107.749	106.073	104.432	102.824	101.242	99.6825	98.1423	96.6163	95.1032	93.5971	92.0981	90.5998	89.1029	87.6005	86.0939	84.5753	83.0468	81.4983	79.9333	78.3406	76.7206	75.0678	73.3713	71.6295	69.8334	67.9723	66.0321	63.9995	61.8517	59.5652	57.1094	54.4227	51.4362	48.0256	43.9452	38.6689
1665	139.516	135.34	131.83	128.758	125.996	123.468	121.12	118.917	116.832	114.845	112.94	111.104	109.327	107.601	105.918	104.271	102.656	101.069	99.5021	97.9554	96.4217	94.9011	93.3871	91.8798	90.373	88.8667	87.355	85.8377	84.3088	82.7672	81.2081	79.6271	78.0234	76.385	74.7133	73.0016	71.236	69.4134	67.5227	65.5502	63.4793	61.2895	58.9537	56.4235	53.652	50.5453	46.959	42.5847	36.7222
1670	139.45	135.265	131.749	128.67	125.901	123.367	121.013	118.804	116.713	114.72	112.809	110.968	109.185	107.453	105.763	104.111	102.489	100.895	99.3216	97.7672	96.2271	94.698	93.1772	91.6603	90.1461	88.6292	87.1095	85.58	84.0423	82.4867	80.9164	79.3209	77.7001	76.0493	74.3573	72.6231	70.8384	68.9931	67.073	65.0674	62.9579	60.7178	58.3213	55.7226	52.8572	49.6162	45.8279	41.1157	34.4554
1675	139.383	135.19	131.667	128.581	125.806	123.265	120.905	118.691	116.594	114.595	112.679	110.831	109.043	107.304	105.608	103.95	102.322	100.72	99.1412	97.579	96.0326	94.4948	92.9669	91.4408	89.9183	88.3916	86.8619	85.3222	83.772	82.2063	80.6208	79.0147	77.3764	75.7073	74.0012	72.2444	70.4347	68.5615	66.6123	64.5716	62.4207	60.1361	57.6771	55.0046	52.0337	48.644	44.6244	39.4896	31.7049
1680	139.317	135.115	131.585	128.493	125.711	123.164	120.798	118.578	116.475	114.471	112.548	110.694	108.9	107.156	105.454	103.789	102.155	100.546	98.9604	97.3908	95.8364	94.2917	92.7545	91.2213	89.6885	88.1541	86.6127	85.0645	83.501	81.9246	80.3251	78.7027	77.0526	75.3642	73.6368	71.8624	70.031	68.1299	66.1495	64.0738	61.8795	59.5383	57.0207	54.257	51.1743	47.6227	43.3378	37.6765	28.0913
1685	139.251	135.041	131.503	128.404	125.616	123.062	120.691	118.464	116.356	114.346	112.417	110.558	108.757	107.007	105.299	103.627	101.987	100.372	98.7785	97.2025	95.6399	94.0885	92.5422	91.0018	89.4586	87.9153	86.3634	84.8037	83.23	81.6391	80.0295	78.3904	76.7231	75.0212	73.2723	71.4743	69.6173	67.6897	65.6772	63.5625	61.3241	58.9332	56.3393	53.4881	50.2811	46.5456	41.9529	35.5994	22.3041
1690	139.184	134.966	131.422	128.315	125.521	122.961	120.584	118.351	116.237	114.221	112.286	110.421	108.614	106.858	105.144	103.466	101.819	100.197	98.5965	97.0143	95.4434	93.8841	92.3298	90.7796	89.2288	87.6743	86.1142	84.5418	82.9583	81.3536	79.7287	78.0781	76.3924	74.6707	72.9056	71.0861	69.2028	67.2459	65.2005	63.0488	60.7606	58.3083	55.6433	52.6954	49.3499	45.4046	40.4291	33.1452
1695	139.118	134.892	131.34	128.227	125.427	122.86	120.477	118.238	116.118	114.096	112.156	110.284	108.472	106.709	104.989	103.304	101.65	100.023	98.4146	96.8245	95.2469	93.6788	92.1175	90.5573	88.999	87.4334	85.8629	84.2799	82.6826	81.0681	79.4273	77.7609	76.0617	74.3198	72.5323	70.6902	68.7826	66.7962	64.7152	62.5198	60.1859	57.6713	54.9308	51.8757	48.3754	44.1907	38.7517	30.0673
1700	139.052	134.818	131.258	128.138	125.332	122.759	120.369	118.125	115.999	113.971	112.025	110.148	108.329	106.56	104.834	103.143	101.482	99.8473	98.2327	96.6346	95.0504	93.4734	91.904	90.3351	88.7661	87.1924	85.6098	84.018	82.4069	80.7785	79.126	77.4421	75.7251	73.9681	72.159	70.292	68.3567	66.3394	64.2237	61.9888	59.5971	57.0226	54.1915	51.0244	47.352	42.8867	36.8614	25.7333
1705	138.986	134.744	131.176	128.049	125.237	122.658	120.262	118.012	115.88	113.846	111.894	110.011	108.186	106.411	104.678	102.981	101.314	99.6716	98.0508	96.4446	94.8524	93.268	91.6891	90.1128	88.5331	86.9507	85.3567	83.752	82.1312	80.4877	78.8211	77.1233	75.3871	73.609	71.7803	69.891	67.9288	65.8791	63.7236	61.4403	59.0017	56.3493	53.4288	50.1344	46.2727	41.4684	34.6682	16.6141
1710	138.92	134.671	131.094	127.961	125.142	122.557	120.155	117.899	115.761	113.721	111.763	109.874	108.043	106.262	104.522	102.819	101.145	99.4959	97.8677	96.2547	94.6539	93.0627	91.4742	89.8891	88.3001	86.7061	85.1036	83.4857	81.8529	80.1969	78.5137	76.8003	75.0492	73.2498	71.3976	69.4822	67.4909	65.4085	63.2164	60.888	58.3844	55.662	52.6428	49.2067	45.1297	39.926	32.0388
1715	138.855	134.597	131.013	127.873	125.047	122.456	120.048	117.786	115.642	113.596	111.632	109.737	107.9	106.113	104.367	102.657	100.977	99.3202	97.6842	96.0647	94.4554	92.8557	91.2593	89.6639	88.0672	86.4616	84.8481	83.2194	81.5722	79.9043	78.2063	76.4747	74.7046	72.8879	71.0149	69.0734	67.053	64.936	62.6997	60.3203	57.7581	54.959	51.8306	48.2363	43.9089	38.2031	28.6214
1720	138.79	134.523	130.932	127.785	124.952	122.355	119.941	117.673	115.523	113.471	111.501	109.6	107.757	105.964	104.211	102.494	100.807	99.1444	97.5007	95.8735	94.2568	92.6479	91.0444	89.4387	87.8318	86.217	84.591	82.9523	81.2915	79.6078	77.8968	76.1491	74.3589	72.52	70.6227	68.6553	66.6038	64.4509	62.1758	59.7437	57.1172	54.2285	50.9886	47.2174	42.5915	36.253	23.4438
1725	138.725	134.449	130.851	127.697	124.858	122.254	119.834	117.56	115.404	113.346	111.37	109.463	107.614	105.814	104.056	102.332	100.638	98.9685	97.3172	95.6817	94.0583	92.4402	90.8273	89.2135	87.5955	85.972	84.3338	82.6814	81.0108	79.3114	77.5831	75.8196	74.0132	72.152	70.2301	68.2353	66.153	63.9647	61.6401	59.1557	56.4558	53.4765	50.1077	46.1434	41.1711	33.9867
1730	138.659	134.375	130.77	127.609	124.763	122.153	119.727	117.447	115.285	113.221	111.239	109.326	107.47	105.664	103.9	102.169	100.468	98.7913	97.1336	95.4899	93.8583	92.2325	90.6097	88.9882	87.3592	85.7236	84.0766	82.4105	80.7251	79.0149	77.2693	75.4868	73.6596	71.7787	69.8332	67.81	65.6934	63.4641	61.0985	58.5517	55.7812	52.7021	49.1894	45.0064	39.6071	31.2058
1735	138.594	134.301	130.689	127.521	124.669	122.052	119.62	117.334	115.166	113.096	111.108	109.189	107.327	105.514	103.743	102.007	100.299	98.6141	96.9497	95.2981	93.6576	92.0248	90.3921	88.7599	87.1229	85.4752	83.8164	82.1396	80.4391	78.7128	76.9546	75.154	73.3058	71.4015	69.4301	67.378	65.2291	62.9622	60.5415	57.9397	55.0883	51.9024	48.2295	43.7856	37.8736	27.5188
1740	138.529	134.227	130.608	127.433	124.574	121.952	119.513	117.221	115.047	112.971	110.977	109.052	107.184	105.365	103.587	101.844	100.129	98.437	96.7645	95.1063	93.4569	91.8149	90.1745	88.5316	86.8849	85.2269	83.5549	81.8663	80.1532	78.4104	76.6341	74.8171	72.9507	71.0244	69.027	66.9445	64.7575	62.4451	59.9803	57.3067	54.3703	51.0708	47.2221	42.4763	35.8993	21.4666
1745	138.463	134.153	130.527	127.345	124.48	121.851	119.407	117.108	114.928	112.846	110.846	108.915	107.041	105.215	103.43	101.68	99.9591	98.2598	96.5792	94.9136	93.2562	91.6047	89.9563	88.3034	86.645	84.9782	83.2934	81.5905	79.8647	78.108	76.3137	74.4767	72.5883	70.6381	68.6136	66.4999	64.2788	61.9256	59.3997	56.6609	53.6335	50.2036	46.1608	41.0651	33.5797
1750	138.398	134.08	130.446	127.257	124.386	121.751	119.3	116.995	114.809	112.721	110.715	108.777	106.897	105.065	103.274	101.517	99.7882	98.0827	96.394	94.7198	93.0555	91.3944	89.7359	88.0751	86.4052	84.7258	83.0319	81.3147	79.5732	77.8016	75.993	74.1362	72.2258	70.2512	68.1995	66.0554	63.7937	61.391	58.8124	56.0031	52.8756	49.3008	45.0379	39.5054	30.7364
1755	138.333	134.006	130.365	127.169	124.291	121.65	119.193	116.882	114.69	112.596	110.584	108.64	106.753	104.915	103.117	101.353	99.6173	97.9047	96.2088	94.526	92.8531	91.1842	89.5154	87.8446	86.1654	84.4734	82.7664	81.0389	79.2817	77.493	75.6655	73.791	71.8599	69.8606	67.7792	65.5991	63.2998	60.8515	58.2103	55.3188	52.0897	48.3578	43.8356	37.7785	26.9087
1760	138.268	133.933	130.284	127.081	124.197	121.55	119.086	116.769	114.571	112.471	110.453	108.502	106.609	104.765	102.961	101.19	99.4465	97.726	96.0236	94.3322	92.6502	90.9737	89.2949	87.613	85.9244	84.221	82.5004	80.7586	78.9901	77.1843	75.3379	73.4426	71.4884	69.4634	67.3533	65.1411	62.7994	60.2982	57.5933	54.6193	51.2723	47.3691	42.5448	35.8141	20.2651
1765	138.202	133.86	130.203	126.993	124.102	121.449	118.979	116.656	114.452	112.346	110.322	108.365	106.466	104.614	102.803	101.026	99.2756	97.5473	95.8368	94.1384	92.4472	90.7608	89.0744	87.3815	85.6808	83.9681	82.2343	80.4777	78.6928	76.873	75.0103	73.0941	71.1168	69.0661	66.9253	64.6734	62.2892	59.7359	56.9671	53.9024	50.425	46.3282	41.1545	33.5089
1770	138.137	133.787	130.122	126.906	124.008	121.348	118.872	116.544	114.333	112.221	110.19	108.228	106.322	104.464	102.646	100.862	99.1047	97.3686	95.6498	93.944	92.2442	90.5479	88.8519	87.1499	85.4372	83.7115	81.9677	80.1967	78.3955	76.5577	74.6755	72.7395	70.7386	68.6598	66.487	64.2012	61.7716	59.1628	56.3176	53.1591	49.5439	45.2277	39.6257	30.6822
1775	138.072	133.714	130.041	126.819	123.914	121.248	118.766	116.431	114.215	112.096	110.059	108.09	106.178	104.313	102.489	100.697	98.9333	97.1899	95.4628	93.7481	92.0412	90.3351	88.6284	86.9171	85.1937	83.4548	81.6969	79.9141	78.0982	76.2425	74.3405	72.3826	70.3575	68.2516	66.0487	63.7204	61.2441	58.5745	55.6547	52.39	48.6246	44.0592	37.9376	26.8832
1780	138.006	133.641	129.96	126.731	123.82	121.147	118.659	116.318	114.096	111.971	109.928	107.953	106.034	104.163	102.331	100.533	98.7611	97.0112	95.2757	93.5522	91.8362	90.1222	88.4049	86.6821	84.9493	83.1982	81.426	79.6277	77.7967	75.9256	74.0054	72.0257	69.9757	67.839	65.5986	63.2332	60.7067	57.9795	54.9781	51.5963	47.6616	42.8014	36.0212	20.3257
1785	137.942	133.568	129.88	126.644	123.726	121.047	118.553	116.205	113.977	111.846	109.796	107.815	105.89	104.012	102.174	100.368	98.5888	96.8309	95.0887	93.3563	91.6308	89.9081	88.1814	86.4471	84.7018	82.9406	81.1552	79.3413	77.4933	75.6034	73.6626	71.6605	69.5843	67.4192	65.1471	62.7377	60.1609	57.3626	54.2743	50.7748	46.649	41.4437	33.7816
1790	137.878	133.495	129.8	126.556	123.632	120.946	118.446	116.092	113.858	111.721	109.665	107.677	105.745	103.861	102.016	100.203	98.4165	96.6506	94.9007	93.1603	91.4254	89.6925	87.9573	86.2121	84.4543	82.6795	80.8822	79.0549	77.1898	75.2811	73.3197	71.2946	69.193	66.9995	64.6862	62.2344	59.6012	56.7358	53.5521	49.9217	45.5795	39.9729	31.0654
1795	137.813	133.422	129.72	126.469	123.538	120.846	118.339	115.979	113.739	111.596	109.533	107.539	105.601	103.71	101.858	100.039	98.2443	96.4702	94.7117	92.964	91.2199	89.4768	87.7306	85.9767	84.2068	82.4184	80.6062	78.7638	76.8839	74.958	72.9762	70.9269	68.7962	66.5675	64.2207	61.7221	59.0358	56.0947	52.8101	49.0313	44.4451	38.3331	27.4626
1800	137.749	133.349	129.639	126.382	123.444	120.746	118.233	115.867	113.62	111.47	109.402	107.401	105.456	103.559	101.7	99.8732	98.072	96.2899	94.5227	92.7659	91.0145	89.2611	87.5039	85.738	83.9586	82.1573	80.3303	78.4717	76.5739	74.6284	72.6249	70.5515	68.3941	66.1355	63.7473	61.2019	58.4507	55.4316	52.0438	48.0981	43.236	36.4945	21.6505
1805	137.685	133.276	129.559	126.294	123.351	120.646	118.126	115.754	113.501	111.345	109.27	107.263	105.312	103.407	101.541	99.7073	97.8989	96.1095	94.3338	92.5677	90.8067	89.0455	87.2772	85.4993	83.7069	81.8944	80.0544	78.1796	76.264	74.2988	72.2736	70.1762	67.9917	65.6946	63.267	60.6705	57.8592	54.7549	51.2447	47.1204	41.9373	34.3749
1810	137.62	133.203	129.479	126.207	123.257	120.546	118.02	115.641	113.382	111.22	109.139	107.125	105.167	103.256	101.383	99.5414	97.7251	95.9285	94.1448	92.3695	90.5986	88.8274	87.0504	85.2607	83.4553	81.6286	79.7742	77.8851	75.953	73.9685	71.9204	69.7955	67.5782	65.2496	62.7796	60.1321	57.2505	54.0602	50.4174	46.0921	40.5178	31.8371
1815	137.556	133.13	129.399	126.12	123.163	120.445	117.913	115.529	113.263	111.095	109.008	106.987	105.023	103.105	101.225	99.3755	97.5513	95.7464	93.9554	92.1714	90.3906	88.6088	86.8211	85.022	83.2036	81.3628	79.493	77.5869	75.6362	73.6311	71.5603	69.4102	67.1647	64.7985	62.2834	59.5791	56.6278	53.3384	49.5584	45.0059	38.9727	28.5748
1820	137.492	133.057	129.318	126.032	123.069	120.345	117.807	115.416	113.144	110.97	108.876	106.849	104.878	102.953	101.066	99.2096	97.3776	95.5642	93.7643	91.9729	90.1826	88.3902	86.591	84.7798	82.9511	81.097	79.2117	77.2887	75.3194	73.2937	71.2002	69.0248	66.744	64.3397	61.7801	59.0214	55.9951	52.5969	48.6633	43.845	37.2362	23.7472
1825	137.427	132.984	129.238	125.945	122.975	120.245	117.7	115.303	113.025	110.844	108.744	106.71	104.733	102.801	100.907	99.0437	97.2038	95.3821	93.5733	91.7724	89.9742	88.1715	86.3609	84.5373	82.6951	80.828	78.9291	76.9903	75.0025	72.9553	70.8359	68.6295	66.3184	63.8771	61.2671	58.4438	55.337	51.8333	47.727	42.6027	35.263
1830	137.363	132.911	129.158	125.859	122.882	120.145	117.594	115.19	112.906	110.719	108.612	106.572	104.587	102.649	100.747	98.8768	97.03	95.2	93.3823	91.5718	89.7635	87.9522	86.1308	84.2948	82.4391	80.5572	78.6422	76.6857	74.6786	72.6097	70.4665	68.2336	65.8896	63.4037	60.7456	57.8604	54.6656	51.0425	46.7439	41.2669	32.9497
1835	137.299	132.839	129.078	125.772	122.788	120.045	117.488	115.078	112.787	110.593	108.48	106.434	104.442	102.496	100.588	98.7096	96.8549	95.0179	93.1913	91.3713	89.5527	87.7304	85.8991	84.0522	82.183	80.2865	78.3553	76.3812	74.3545	72.2642	70.0971	67.833	65.4512	62.928	60.2147	57.26	53.9793	50.2167	45.7071	39.8109	30.0797
1840	137.234	132.767	128.997	125.685	122.695	119.945	117.381	114.965	112.668	110.468	108.348	106.295	104.297	102.344	100.428	98.5424	96.6796	94.834	93.0003	91.1707	89.342	87.5087	85.6654	83.8065	81.9257	80.0157	78.0684	76.0766	74.0304	71.9166	69.7204	67.4258	65.0128	62.439	59.6726	56.6463	53.2646	49.3594	44.6088	38.2014	26.1618
1845	137.17	132.695	128.918	125.598	122.601	119.845	117.275	114.852	112.549	110.342	108.216	106.157	104.152	102.192	100.269	98.3751	96.5042	94.65	92.807	90.9698	89.1312	87.2869	85.4318	83.5599	81.665	79.74	77.777	75.767	73.6995	71.5623	69.3411	67.0187	64.5612	61.9483	59.1227	56.0224	52.5299	48.4663	43.4399	36.3907	19.0504
1850	137.106	132.623	128.838	125.512	122.508	119.745	117.168	114.74	112.43	110.217	108.085	106.018	104.007	102.04	100.109	98.2079	96.3288	94.466	92.6138	90.7667	88.9193	87.0651	85.1981	83.3133	81.4044	79.464	77.4842	75.4557	73.3678	71.2081	68.9608	66.6001	64.1093	61.4427	58.557	55.3743	51.7738	47.5326	42.1896	34.3096
1855	137.041	132.55	128.759	125.425	122.414	119.645	117.062	114.627	112.311	110.092	107.952	105.879	103.861	101.887	99.9494	98.0406	96.1534	94.282	92.4206	90.5637	88.7057	86.841	84.9638	83.0667	81.1437	79.188	77.1913	75.1443	73.0361	70.8501	68.5711	66.1811	63.6463	60.935	57.9863	54.7138	50.9932	46.5524	40.8356	31.8243
1860	136.977	132.478	128.679	125.338	122.321	119.545	116.956	114.514	112.191	109.966	107.82	105.74	103.715	101.734	99.7886	97.8723	95.9778	94.098	92.2274	90.3606	88.492	86.6159	84.7264	82.817	80.8808	78.9102	76.8963	74.8292	72.6972	70.4867	68.1814	65.7549	63.1799	60.4118	57.3943	54.0377	50.1764	45.5191	39.3525	28.6508
1865	136.914	132.406	128.599	125.251	122.227	119.445	116.849	114.401	112.072	109.84	107.688	105.601	103.569	101.58	99.6279	97.7036	95.8007	93.9131	92.0342	90.1575	88.2783	86.3908	84.4889	82.5661	80.6153	78.6287	76.5973	74.5108	72.3575	70.1232	67.7858	65.3232	62.7041	59.8847	56.7947	53.3343	49.3287	44.425	37.7137	24.0333
1870	136.851	132.334	128.52	125.164	122.134	119.345	116.743	114.289	111.953	109.715	107.556	105.462	103.423	101.427	99.4671	97.5349	95.6236	93.727	91.8391	89.9539	88.0647	86.1657	84.2514	82.3152	80.3498	78.3471	76.2982	74.1924	72.0177	69.7534	67.385	64.8881	62.2224	59.3427	56.1795	52.613	48.4463	43.261	35.8665	9.3797
1875	136.787	132.262	128.44	125.078	122.04	119.245	116.637	114.176	111.834	109.589	107.423	105.323	103.277	101.274	99.3064	97.3662	95.4465	93.541	91.6435	89.7481	87.8489	85.9397	84.014	82.0643	80.0843	78.0656	75.999	73.871	71.6699	69.3803	66.9838	64.4431	61.7319	58.7934	55.5468	51.8712	47.5242	42.0166	33.7187
1880	136.724	132.189	128.361	124.991	121.947	119.146	116.531	114.063	111.715	109.463	107.291	105.184	103.131	101.121	99.1456	97.1975	95.2695	93.355	91.448	89.5424	87.6322	85.7111	83.7728	81.8101	79.8152	77.7796	75.6933	73.5451	71.3216	69.0072	66.5713	63.998	61.2339	58.2314	54.903	51.1017	46.557	40.6587	31.1323
1885	136.66	132.117	128.281	124.905	121.854	119.046	116.424	113.951	111.596	109.337	107.159	105.045	102.985	100.967	98.9847	97.0288	95.0924	93.169	91.2524	89.3366	87.4154	85.4825	83.5313	81.5546	79.5445	77.4922	75.3876	73.2191	70.9726	68.6241	66.1589	63.5387	60.7266	57.6568	54.2364	50.3008	45.5381	39.1839	27.7651
1890	136.597	132.045	128.202	124.818	121.761	118.946	116.318	113.838	111.476	109.212	107.026	104.905	102.838	100.813	98.8226	96.8588	94.9144	92.9828	91.0569	89.1309	87.1987	85.254	83.2899	81.2992	79.2739	77.2049	75.0819	72.8906	70.6153	68.2407	65.7388	63.0794	60.2112	57.0735	53.5514	49.4708	44.4601	37.5435	22.5871
1895	136.533	131.973	128.122	124.732	121.668	118.846	116.212	113.725	111.357	109.086	106.894	104.766	102.691	100.659	98.6606	96.6885	94.7355	92.7946	90.8596	88.9241	86.9817	85.0254	83.0485	81.0438	79.0032	76.9157	74.7711	72.5568	70.258	67.8533	65.3139	62.6077	59.6849	56.4701	52.85	48.6077	43.3139	35.6962
1900	136.47	131.902	128.042	124.646	121.575	118.747	116.106	113.612	111.238	108.96	106.761	104.626	102.544	100.504	98.4985	96.5183	94.5565	92.6065	90.6616	88.7155	86.7617	84.7935	82.8037	80.7844	78.7272	76.6222	74.4584	72.2229	69.898	67.459	64.8856	62.1333	59.151	55.8584	52.1242	47.7068	42.0895	33.5507
1905	136.407	131.83	127.963	124.56	121.482	118.647	115.999	113.5	111.119	108.834	106.628	104.486	102.397	100.35	98.3364	96.348	94.3776	92.4183	90.4636	88.507	86.5418	84.5612	82.558	80.5242	78.4511	76.3287	74.1457	71.8863	69.5312	67.0648	64.4476	61.6474	58.6029	55.2276	51.3711	46.7629	40.7601	30.9676
1910	136.343	131.759	127.884	124.473	121.389	118.547	115.893	113.387	111	108.708	106.495	104.346	102.25	100.196	98.1743	96.1778	94.1987	92.2302	90.2656	88.2984	86.3218	84.3289	82.3124	80.264	78.175	76.0352	73.8291	71.544	69.1644	66.661	64.0095	61.157	58.0493	54.5802	50.5942	45.7696	39.3121	27.5825
1915	136.28	131.687	127.805	124.387	121.296	118.448	115.787	113.274	110.88	108.582	106.362	104.207	102.103	100.041	98.0123	96.0075	94.0197	92.042	90.0676	88.0898	86.1018	84.0967	82.0667	80.0038	77.8968	75.7359	73.509	71.2018	68.792	66.2552	63.5578	60.655	57.4765	53.9199	49.7902	44.7197	37.7134	22.3588
1920	136.216	131.616	127.726	124.301	121.203	118.348	115.681	113.162	110.761	108.456	106.229	104.067	101.956	99.8863	97.8489	95.8356	93.8391	91.8521	89.8679	87.8795	85.88	83.8621	81.8178	79.7387	77.615	75.4359	73.1889	70.8559	68.4151	65.8449	63.1058	60.1475	56.8979	53.2348	48.9554	43.6047	35.9193
1925	136.153	131.544	127.647	124.214	121.11	118.248	115.575	113.049	110.641	108.33	106.097	103.927	101.808	99.7308	97.6854	95.6637	93.6582	91.6617	89.6673	87.6679	85.6566	83.6259	81.5678	79.4734	77.3332	75.1359	72.8657	70.5048	68.0381	65.427	62.6424	59.627	56.3007	52.5299	48.0813	42.4147	33.8424
1930	136.089	131.473	127.568	124.128	121.016	118.149	115.469	112.936	110.522	108.204	105.964	103.786	101.66	99.5753	97.5219	95.4918	93.4773	91.4713	89.4667	87.4564	85.4333	83.3897	81.3177	79.2082	77.0514	74.8321	72.5378	70.1538	67.6516	65.009	62.1755	59.1013	55.6915	51.8062	47.1665	41.138	31.3516
1935	136.026	131.401	127.489	124.042	120.924	118.049	115.362	112.823	110.402	108.078	105.83	103.646	101.513	99.4199	97.3584	95.3198	93.2964	91.2809	89.266	87.2448	85.2099	83.1536	81.0676	78.9418	76.7646	74.5253	72.21	69.7974	67.264	64.5784	61.6988	58.5599	55.0701	51.0584	46.2078	39.7451	28.1723
1940	135.963	131.33	127.41	123.956	120.831	117.95	115.256	112.71	110.283	107.951	105.697	103.505	101.365	99.2644	97.1949	95.1479	93.1156	91.0905	89.0654	87.0332	84.9863	82.9159	80.8141	78.6713	76.4768	74.2184	71.8792	69.4369	66.8728	64.1475	61.2161	58.0147	54.4258	50.2783	45.1987	38.2169	23.4624
1945	135.9	131.258	127.331	123.87	120.738	117.85	115.15	112.598	110.163	107.825	105.563	103.365	101.217	99.1089	97.0314	94.9757	92.9339	90.8988	88.863	86.819	84.7593	82.6756	80.5594	78.4007	76.1889	73.9095	71.5431	69.0765	66.4739	63.7076	60.7242	57.4494	53.7692	49.4711	44.132	36.5072
1950	135.838	131.187	127.253	123.784	120.645	117.751	115.044	112.485	110.044	107.698	105.43	103.224	101.069	98.953	96.8667	94.802	92.751	90.706	88.6596	86.6043	84.5323	82.4354	80.3046	78.1302	75.8989	73.5954	71.207	68.7082	66.0749	63.2629	60.2246	56.8789	53.0943	48.633	42.999	34.5596
1955	135.775	131.115	127.174	123.698	120.553	117.651	114.938	112.372	109.924	107.572	105.296	103.084	100.921	98.7963	96.7017	94.6283	92.568	90.5132	88.4562	86.3895	84.3053	82.1951	80.0499	77.8568	75.6047	73.2813	70.8676	68.3378	65.6663	62.8123	59.7153	56.2908	52.3938	47.7598	41.7769	32.2666
1960	135.713	131.044	127.095	123.613	120.46	117.552	114.832	112.259	109.805	107.445	105.163	102.943	100.772	98.6395	96.5367	94.4546	92.3851	90.3204	88.2528	86.1748	84.0783	81.954	79.7911	77.5806	75.3105	72.9664	70.5228	67.9666	65.2553	62.353	59.1978	55.6907	51.675	46.8464	40.4602	29.4154
1965	135.65	130.973	127.016	123.527	120.367	117.452	114.725	112.146	109.685	107.319	105.03	102.802	100.623	98.4828	96.3717	94.2809	92.2021	90.1275	88.0495	85.9595	83.8488	81.7093	79.5315	77.3045	75.0163	72.6446	70.1781	67.5857	64.8396	61.8901	58.6686	55.0789	50.9354	45.887	39.0336	25.499
1970	135.587	130.902	126.937	123.441	120.274	117.353	114.619	112.034	109.565	107.192	104.896	102.66	100.474	98.326	96.2067	94.1072	92.0192	89.9339	87.8439	85.7414	83.618	81.4647	79.2718	77.0283	74.7157	72.3229	69.8288	67.2048	64.4159	61.4153	58.132	54.4449	50.1642	44.8746	37.4418	18.1715
1975	135.525	130.831	126.859	123.355	120.182	117.253	114.513	111.921	109.446	107.066	104.762	102.519	100.325	98.1693	96.0417	93.9327	91.8342	89.7385	87.6376	85.5233	83.3872	81.2201	79.0121	76.7469	74.4148	72.0012	69.4749	66.8188	63.992	60.9384	57.5801	53.7993	49.3637	43.8013	35.66
1980	135.462	130.76	126.78	123.269	120.089	117.154	114.407	111.808	109.326	106.939	104.627	102.377	100.176	98.0125	95.8755	93.7571	91.6491	89.5432	87.4313	85.3053	83.1564	80.975	78.7474	76.4648	74.1139	71.6714	69.1209	66.4268	63.5548	60.447	57.0231	53.1348	48.5331	42.6578	33.6033
1985	135.4	130.69	126.702	123.184	119.996	117.055	114.301	111.695	109.206	106.812	104.493	102.236	100.027	97.8545	95.7089	93.5815	91.4639	89.3478	87.225	85.0872	82.9243	80.7258	78.4826	76.1827	73.8085	71.3416	68.7605	66.0348	63.1177	59.9541	56.4452	52.4468	47.6682	41.433	31.1444
1990	135.337	130.619	126.624	123.098	119.904	116.955	114.195	111.582	109.086	106.685	104.359	102.095	99.8774	97.6964	95.5423	93.4059	91.2788	89.1525	87.0187	84.867	82.6895	80.4766	78.2177	75.8985	73.5005	71.0117	68.3968	65.6321	62.67	59.445	55.8609	51.7417	46.7641	40.114	27.9984
1995	135.274	130.548	126.545	123.012	119.811	116.856	114.089	111.469	108.967	106.558	104.225	101.953	99.7274	97.5382	95.3756	93.2303	91.0936	88.9565	86.8096	84.6454	82.4546	80.2274	77.9518	75.6102	73.1925	70.6737	68.0331	65.2283	62.2184	58.9337	55.2588	51.0163	45.8151	38.664	23.3338
2000	135.212	130.477	126.467	122.927	119.719	116.757	113.982	111.356	108.847	106.431	104.091	101.811	99.5773	97.3801	95.209	93.0547	90.9073	88.7585	86.6003	84.4238	82.2198	79.9778	77.6814	75.3219	72.8817	70.3354	67.66	64.8191	61.759	58.4058	54.6423	50.2576	44.8145	37.0676
2005	135.149	130.407	126.388	122.841	119.626	116.657	113.876	111.243	108.726	106.304	103.957	101.668	99.4273	97.222	95.0424	92.8777	90.7198	88.5604	86.3909	84.2022	81.9847	79.7237	77.4111	75.0336	72.5661	69.9969	67.286	64.4028	61.2921	57.8734	54.0151	49.474	43.7544	35.2555
2010	135.087	130.336	126.31	122.756	119.534	116.558	113.77	111.13	108.606	106.177	103.822	101.526	99.2773	97.0639	94.8745	92.7001	90.5323	88.3624	86.1815	83.9803	81.7457	79.4697	77.1407	74.7395	72.2506	69.6496	66.9094	63.9861	60.8192	57.3254	53.3616	48.6619	42.6258	33.1635
2015	135.024	130.265	126.232	122.67	119.441	116.459	113.664	111.017	108.486	106.05	103.687	101.384	99.1272	96.9049	94.7061	92.5225	90.3448	88.1644	85.9717	83.755	81.5066	79.2157	76.8675	74.4446	71.9335	69.3022	66.5245	63.5565	60.3361	56.7688	52.6946	47.8173	41.4178	30.6323
2020	134.962	130.194	126.153	122.585	119.349	116.359	113.558	110.904	108.366	105.922	103.552	101.242	98.977	96.7453	94.5378	92.3449	90.1573	87.9658	85.7591	83.5297	81.2675	78.9609	76.5914	74.1497	71.61	68.9536	66.1395	63.1269	59.8477	56.1994	52.0117	46.9355	40.1179	27.3549
2025	134.9	130.124	126.075	122.5	119.257	116.26	113.452	110.791	108.246	105.795	103.417	101.099	98.8257	96.5857	94.3694	92.1672	89.9695	87.765	85.5465	83.3044	81.0285	78.7018	76.3152	73.8514	71.2866	68.5966	65.7472	62.6873	59.3472	55.6151	51.2982	46.0104	38.6911	22.3428
2030	134.838	130.053	125.996	122.414	119.164	116.161	113.346	110.677	108.126	105.667	103.283	100.957	98.6745	96.4261	94.2011	91.9895	89.7795	87.5641	85.3338	83.0791	80.7855	78.4427	76.0391	73.5496	70.9622	68.2397	65.3507	62.2436	58.8411	55.0227	50.5648	45.0354	37.1211
2035	134.777	129.982	125.918	122.329	119.072	116.061	113.239	110.564	108.006	105.54	103.148	100.813	98.5232	96.2665	94.0328	91.8097	89.5895	87.3632	85.1212	82.8512	80.542	78.1836	75.7577	73.2478	70.6304	67.8795	64.9527	61.7932	58.3221	54.4066	49.8085	44.0069	35.3455
2040	134.715	129.912	125.841	122.243	118.979	115.962	113.133	110.451	107.886	105.412	103.013	100.67	98.3719	96.107	93.8629	91.63	89.3996	87.1623	84.9071	82.622	80.2984	77.9229	75.4754	72.9446	70.2986	67.5124	64.5439	61.3344	57.7957	53.7806	49.025	42.9118	33.3016
2045	134.653	129.842	125.763	122.158	118.887	115.863	113.027	110.338	107.765	105.284	102.877	100.527	98.2207	95.9469	93.6927	91.4502	89.2096	86.9609	84.6911	82.3928	80.0549	77.6584	75.1931	72.6354	69.9659	67.1454	64.1351	60.8714	57.257	53.1371	48.2038	41.7407	30.8529
2050	134.591	129.772	125.685	122.072	118.795	115.764	112.921	110.225	107.645	105.157	102.742	100.383	98.0694	95.7857	93.5226	91.2705	89.0197	86.757	84.475	82.1635	79.8077	77.3939	74.9088	72.3263	69.6253	66.7718	63.7176	60.3966	56.7072	52.4713	47.3495	40.4817	27.705
2055	134.529	129.702	125.607	121.987	118.703	115.664	112.815	110.112	107.524	105.029	102.606	100.24	97.9174	95.6246	93.3524	91.0907	88.8274	86.5531	84.2589	81.9331	79.5595	77.1294	74.6201	72.0171	69.2846	66.3941	63.2957	59.9191	56.1474	51.7904	46.4575	39.1206	23.052
2060	134.467	129.631	125.529	121.902	118.61	115.565	112.708	109.998	107.404	104.901	102.47	100.097	97.7649	95.4634	93.1822	90.9098	88.6348	86.3492	84.0429	81.6997	79.3112	76.8621	74.3314	71.7006	68.9424	66.0163	62.8697	59.4274	55.5709	51.088	45.5223	37.6147
2065	134.406	129.561	125.451	121.817	118.518	115.466	112.602	109.885	107.283	104.773	102.335	99.9531	97.6123	95.3023	93.012	90.7278	88.4422	86.1453	83.8239	81.4664	79.063	76.5919	74.0427	71.3837	68.5924	65.6277	62.434	58.9332	54.988	50.3569	44.5375	35.9444
2070	134.344	129.491	125.373	121.732	118.426	115.367	112.496	109.772	107.163	104.645	102.199	99.8087	97.4597	95.1411	92.84	90.5458	88.2497	85.9405	83.6042	81.233	78.811	76.3218	73.7482	71.0667	68.2424	65.2385	61.9982	58.4233	54.3814	49.6034	43.4955	34.0315
2075	134.282	129.421	125.295	121.647	118.334	115.267	112.39	109.658	107.042	104.517	102.063	99.6643	97.3071	94.9798	92.6679	90.3638	88.0571	85.7335	83.3845	80.9996	78.5578	76.0517	73.4526	70.7433	67.8893	64.8447	61.5477	57.91	53.7651	48.8243	42.3875	31.7699
2080	134.22	129.351	125.217	121.562	118.241	115.168	112.283	109.545	106.921	104.388	101.927	99.5199	97.1545	94.8169	92.4958	90.1817	87.8626	85.5264	83.1648	80.7619	78.3046	75.7767	73.1571	70.4182	67.5293	64.4436	61.0972	57.3807	53.1324	48.0152	41.2032	28.9755
2085	134.158	129.281	125.14	121.477	118.149	115.069	112.177	109.431	106.801	104.26	101.791	99.3755	97.002	94.6541	92.3236	89.9997	87.6672	85.3194	82.9442	80.5242	78.0514	75.5006	72.8582	70.093	67.1694	64.0424	60.6345	56.8455	52.4778	47.1653	39.9257	25.1199
2090	134.097	129.211	125.062	121.392	118.057	114.97	112.071	109.318	106.68	104.132	101.654	99.2311	96.848	94.4913	92.1515	89.8153	87.4719	85.1123	82.7207	80.2864	77.794	75.2245	72.5555	69.7617	66.8039	63.6297	60.1683	56.2954	51.8089	46.2784	38.5241	17.9028
2095	134.035	129.141	124.984	121.307	117.965	114.871	111.965	109.204	106.559	104.004	101.518	99.0867	96.694	94.3285	91.9791	89.6309	87.2766	84.9037	82.4972	80.0487	77.5355	74.9472	72.2528	69.4279	66.4334	63.2157	59.6914	55.735	51.1184	45.349	36.9915
2100	133.973	129.07	124.906	121.222	117.873	114.771	111.858	109.091	106.438	103.875	101.381	98.9418	96.54	94.1657	91.8049	89.4465	87.0812	84.6933	82.2737	79.8073	77.2771	74.6647	71.9489	69.0941	66.063	62.7952	59.2085	55.1627	50.401	44.3709	35.2542
2105	133.912	129	124.829	121.137	117.781	114.672	111.752	108.977	106.317	103.746	101.245	98.7962	96.386	94.0028	91.6307	89.262	86.8842	84.4829	82.0501	79.565	77.0186	74.3823	71.6386	68.7537	65.6833	62.3676	58.7154	54.5734	49.6626	43.3367	33.2622
2110	133.851	128.931	124.752	121.052	117.689	114.573	111.645	108.864	106.196	103.617	101.108	98.6507	96.232	93.8383	91.4565	89.0776	86.6859	84.2725	81.8235	79.3226	76.755	74.0999	71.3282	68.4107	65.3017	61.938	58.2147	53.9763	48.9	42.2377	30.889
2115	133.79	128.861	124.674	120.967	117.597	114.474	111.539	108.75	106.075	103.488	100.971	98.5051	96.078	93.6737	91.2823	88.8917	86.4877	84.0621	81.596	79.0803	76.491	73.8132	71.0179	68.0677	64.9176	61.4959	57.703	53.3547	48.1045	41.0638	27.8687
2120	133.729	128.792	124.597	120.882	117.504	114.375	111.433	108.636	105.954	103.359	100.834	98.3595	95.9233	93.5091	91.1081	88.7048	86.2894	83.8493	81.3684	78.8347	76.227	73.5241	70.7001	67.7169	64.5241	61.0538	57.1832	52.7213	47.2735	39.7899	23.4866
2125	133.668	128.722	124.519	120.797	117.412	114.275	111.326	108.522	105.832	103.23	100.696	98.2139	95.7678	93.3445	90.9331	88.5178	86.0912	83.6353	81.1409	78.5875	75.9622	73.235	70.3817	67.3642	64.1307	60.5982	56.6501	52.0722	46.4074	38.4027	11.6501
2130	133.607	128.652	124.442	120.712	117.32	114.176	111.22	108.409	105.711	103.101	100.559	98.0683	95.6123	93.1799	90.7567	88.3309	85.8912	83.4214	80.9117	78.3403	75.6924	72.9446	70.0634	67.0115	63.7289	60.1407	56.1099	51.3969	45.501	36.8794
2135	133.546	128.583	124.364	120.628	117.228	114.077	111.113	108.295	105.589	102.972	100.421	97.9221	95.4567	93.0153	90.5803	88.1439	85.6899	83.2075	80.6799	78.0932	75.4226	72.6485	69.7383	66.6488	63.3229	59.6718	55.5524	50.7052	44.5482	35.163
2140	133.484	128.513	124.287	120.543	117.136	113.978	111.007	108.181	105.468	102.842	100.284	97.7752	95.3012	92.849	90.4039	87.9563	85.4886	82.9934	80.4481	77.8428	75.1527	72.3524	69.4114	66.2858	62.9142	59.1979	54.99	49.9946	43.542	33.1903
2145	133.423	128.444	124.21	120.458	117.044	113.878	110.9	108.067	105.346	102.713	100.146	97.6283	95.1457	92.6825	90.2275	87.7667	85.2872	82.7758	80.2163	77.5905	74.8802	72.0563	69.0846	65.9205	62.4949	58.7138	54.4046	49.25	42.4741	30.8407
2150	133.362	128.374	124.132	120.373	116.952	113.779	110.794	107.953	105.225	102.583	100.009	97.4815	94.9901	92.516	90.0511	87.577	85.0859	82.5581	79.9842	77.3382	74.6042	71.7542	68.7511	65.5465	62.0755	58.2224	53.8115	48.4807	41.3349	27.8635
2155	133.301	128.305	124.055	120.289	116.86	113.68	110.687	107.839	105.103	102.453	99.8702	97.3346	94.833	92.3496	89.873	87.3874	84.8827	82.3405	79.7479	77.0859	74.3282	71.4506	68.4153	65.1726	61.6445	57.7207	53.201	47.6836	40.1127	23.5704
2160	133.24	128.235	123.977	120.204	116.768	113.581	110.581	107.725	104.982	102.324	99.7316	97.1878	94.6759	92.1831	89.6943	87.1978	84.6781	82.1228	79.5116	76.83	74.0522	71.1471	68.0795	64.7924	61.211	57.2106	52.5725	46.8545	38.7799	12.8275
2165	133.179	128.166	123.9	120.119	116.676	113.482	110.474	107.611	104.86	102.194	99.593	97.0409	94.5188	92.0166	89.5156	87.0081	84.4735	81.9035	79.2753	76.5723	73.771	70.8395	67.7364	64.4069	60.7697	56.6887	51.9322	45.9886	37.3176
2170	133.118	128.096	123.823	120.034	116.584	113.382	110.368	107.497	104.737	102.064	99.4545	96.8931	94.3617	91.8483	89.3368	86.8158	84.2689	81.6819	79.039	76.3146	73.4885	70.5281	67.3911	64.0214	60.3211	56.1586	51.2658	45.076	35.6897
2175	133.057	128.027	123.746	119.95	116.493	113.283	110.261	107.383	104.615	101.934	99.3159	96.7449	94.2046	91.6798	89.1581	86.6233	84.0643	81.4603	78.7988	76.0569	73.206	70.2167	67.0457	63.6242	59.8679	55.6134	50.5807	44.1164	33.8401
2180	132.996	127.957	123.669	119.865	116.401	113.184	110.154	107.268	104.493	101.803	99.1773	96.5967	94.0474	91.5113	88.9791	86.4308	83.8574	81.2387	78.5578	75.7947	72.9216	69.9028	66.6916	63.2264	59.4031	55.0619	49.8775	43.1031	31.6629
2185	132.935	127.888	123.592	119.781	116.309	113.085	110.048	107.154	104.371	101.673	99.0388	96.4485	93.8891	91.3429	88.7979	86.2384	83.6494	81.0171	78.3168	75.5313	72.6322	69.5831	66.3362	62.8229	58.9361	54.49	49.1463	42.028	28.9954
2190	132.875	127.819	123.515	119.696	116.217	112.985	109.941	107.04	104.249	101.542	98.8994	96.3002	93.7303	91.1744	88.6167	86.0459	83.4414	80.7917	78.0758	75.2679	72.3429	69.2634	65.9802	62.412	58.4542	53.9119	48.3859	40.8738	25.3662
2195	132.814	127.75	123.438	119.612	116.125	112.886	109.834	106.926	104.127	101.412	98.7597	96.152	93.5715	91.0059	88.4356	85.8511	83.2333	80.566	77.8313	75.0045	72.0535	68.9421	65.6141	62.0011	57.9712	53.3128	47.5987	39.6286	19.0707
2200	132.754	127.681	123.361	119.527	116.033	112.787	109.727	106.811	104.005	101.281	98.62	96.0038	93.4127	90.8354	88.2544	85.6557	83.0253	80.3403	77.5853	74.7352	71.7582	68.6136	65.248	61.5763	57.4709	52.7011	46.7806	38.2793
2205	132.694	127.612	123.284	119.443	115.941	112.687	109.621	106.696	103.882	101.151	98.4803	95.8542	93.2538	90.6647	88.0732	85.4602	82.8141	80.1146	77.3393	74.4657	71.4616	68.2851	64.8782	61.1515	56.9695	52.0756	45.9271	36.7937
2210	132.633	127.543	123.207	119.358	115.849	112.588	109.514	106.582	103.759	101.02	98.3406	95.7045	93.095	90.4941	87.8905	85.2647	82.6025	79.8867	77.0933	74.1963	71.1649	67.9554	64.5007	60.7172	56.4496	51.4251	45.031	35.1312
2215	132.573	127.474	123.13	119.274	115.757	112.489	109.407	106.467	103.637	100.889	98.2009	95.5549	92.9354	90.3235	87.7067	85.0693	82.3908	79.6566	76.844	73.9252	70.8649	67.6176	64.1233	60.2775	55.9269	50.7605	44.0861	33.2237
2220	132.512	127.405	123.053	119.189	115.665	112.39	109.3	106.353	103.514	100.757	98.0612	95.4052	92.7748	90.1529	87.5229	84.8718	82.1792	79.4265	76.5927	73.6494	70.5606	67.2798	63.7377	59.8321	55.386	50.0759	43.0895	30.9748
2225	132.452	127.336	122.976	119.105	115.574	112.29	109.193	106.238	103.391	100.626	97.9208	95.2555	92.6141	89.9821	87.3391	84.6731	81.967	79.1964	76.3414	73.3736	70.2563	66.9403	63.3482	59.3767	54.8387	49.362	42.033	28.1477
2230	132.392	127.267	122.9	119.02	115.482	112.191	109.086	106.123	103.268	100.494	97.7799	95.1059	92.4535	89.8092	87.1553	84.4745	81.7515	78.9656	76.0902	73.0979	69.9507	66.5926	62.9573	58.9184	54.2754	48.6267	40.9014	24.2001
2235	132.331	127.198	122.823	118.936	115.39	112.092	108.98	106.009	103.145	100.363	97.639	94.9557	92.2928	89.6364	86.9711	84.2759	81.536	78.7309	75.8353	72.8178	69.6382	66.2449	62.555	58.4461	53.6997	47.8669	39.6815	16.1869
2240	132.271	127.129	122.746	118.852	115.298	111.992	108.872	105.894	103.023	100.231	97.4981	94.8045	92.1322	89.4635	86.7846	84.0773	81.3206	78.4962	75.5785	72.5353	69.3258	65.8941	62.1527	57.9729	53.1122	47.0749	38.3609
2245	132.21	127.06	122.67	118.768	115.206	111.893	108.765	105.779	102.899	100.1	97.3572	94.6533	91.9712	89.2907	86.5981	83.8766	81.1051	78.2615	75.3217	72.2528	69.0134	65.536	61.7419	57.4827	52.5037	46.245	36.9163
2250	132.15	126.991	122.593	118.683	115.114	111.793	108.658	105.663	102.776	99.968	97.2162	94.5021	91.8086	89.1178	86.4115	83.6747	80.8876	78.0268	75.0648	71.9696	68.6927	65.1779	61.326	56.9922	51.8854	45.3789	35.2941
2255	132.089	126.923	122.516	118.599	115.022	111.694	108.551	105.548	102.652	99.8355	97.0753	94.3509	91.646	88.9442	86.225	83.4727	80.6681	77.7878	74.8036	71.68	68.3717	64.8142	60.9069	56.4827	51.2441	44.4713	33.4501
2260	132.029	126.854	122.44	118.515	114.931	111.595	108.444	105.433	102.529	99.703	96.9338	94.1997	91.4834	88.769	86.0385	83.2707	80.4486	77.5483	74.5409	71.3904	68.0507	64.4449	60.4765	55.9722	50.5842	43.5157	31.287
2265	131.969	126.786	122.363	118.43	114.839	111.495	108.337	105.318	102.405	99.5705	96.7916	94.0484	91.3209	88.5937	85.8497	83.0688	80.2291	77.3087	74.2782	71.1008	67.722	64.0757	60.0461	55.4422	49.9087	42.5046	28.6121
2270	131.909	126.717	122.286	118.346	114.747	111.396	108.229	105.203	102.282	99.438	96.6494	93.8961	91.1583	88.4185	85.6602	82.8645	80.0096	77.0691	74.0155	70.8064	67.3919	63.6971	59.6018	54.9086	49.2049	41.4292	24.995
2275	131.849	126.649	122.21	118.262	114.655	111.296	108.122	105.088	102.158	99.3055	96.5071	93.7432	90.9956	88.2433	85.4708	82.659	79.7861	76.8259	73.747	70.5093	67.0618	63.3161	59.156	54.3566	48.4764	40.2791	18.5355
2280	131.79	126.58	122.133	118.178	114.563	111.197	108.015	104.973	102.035	99.173	96.3649	93.5904	90.831	88.068	85.2814	82.4536	79.5623	76.5812	73.4781	70.2122	66.7238	62.9329	58.6994	53.7961	47.7242	39.0418
2285	131.73	126.512	122.056	118.093	114.471	111.097	107.908	104.857	101.911	99.0405	96.2227	93.4375	90.6664	87.8913	85.092	82.2481	79.3386	76.3366	73.2092	69.9129	66.384	62.5394	58.237	53.2205	46.9447	37.6817
2290	131.67	126.443	121.98	118.009	114.38	110.998	107.8	104.741	101.786	98.9072	96.0805	93.2846	90.5018	87.7135	84.901	82.0426	79.1148	76.0919	72.9388	69.6079	66.0443	62.1458	57.7661	52.6291	46.127	36.1889
2295	131.61	126.374	121.903	117.925	114.288	110.898	107.693	104.626	101.662	98.7737	95.9376	93.1318	90.3371	87.5358	84.7085	81.8342	78.8889	75.8438	72.6634	69.3029	65.6956	61.7439	57.2861	52.0281	45.2715	34.5068
2300	131.55	126.306	121.827	117.841	114.196	110.799	107.585	104.51	101.538	98.6401	95.794	92.9787	90.1725	87.358	84.516	81.625	78.6607	75.5937	72.388	68.9979	65.3456	61.337	56.7985	51.4009	44.3758	32.5767
2305	131.491	126.237	121.751	117.757	114.104	110.699	107.478	104.394	101.413	98.5065	95.6504	92.824	90.0079	87.1803	84.3235	81.4159	78.4325	75.3436	72.1125	68.6845	64.9955	60.9277	56.2997	50.7619	43.4336	30.2772
2310	131.431	126.169	121.674	117.673	114.012	110.599	107.37	104.278	101.289	98.3729	95.5068	92.6694	89.8412	87.0025	84.131	81.2067	78.2043	75.0935	71.833	68.3711	64.6347	60.5067	55.7929	50.1041	42.4378	27.36
2315	131.371	126.1	121.598	117.588	113.92	110.5	107.263	104.163	101.165	98.2393	95.3632	92.5148	89.6744	86.8221	83.9375	80.9975	77.9755	74.8398	71.5507	68.0577	64.2739	60.0856	55.274	49.4195	41.3797	23.1706
2320	131.311	126.032	121.522	117.504	113.829	110.4	107.155	104.047	101.04	98.1058	95.2196	92.3602	89.5076	86.6417	83.7418	80.7844	77.7426	74.584	71.2683	67.7371	63.9102	59.6525	54.7449	48.7165	40.2491	12.7251
2325	131.251	125.964	121.445	117.42	113.737	110.301	107.048	103.931	100.915	97.9719	95.0759	92.2056	89.3408	86.4613	83.546	80.5713	77.5096	74.3282	70.9856	67.4149	63.5379	59.2164	54.2044	47.9922	39.0341
2330	131.192	125.895	121.369	117.336	113.645	110.201	106.94	103.815	100.79	97.8372	94.9316	92.051	89.174	86.2809	83.3503	80.3582	77.2767	74.0724	70.696	67.0926	63.1656	58.7721	53.6495	47.2311	37.7007
2335	131.132	125.827	121.293	117.252	113.553	110.101	106.832	103.698	100.665	97.7024	94.7865	91.8951	89.0072	86.1005	83.1546	80.1451	77.0438	73.8122	70.4063	66.7636	62.7864	58.3198	53.0859	46.442	36.2392
2340	131.072	125.759	121.216	117.168	113.461	110.002	106.724	103.582	100.54	97.5677	94.6414	91.7386	88.8382	85.9189	82.9582	79.9307	76.8068	73.5504	70.1167	66.4319	62.4018	57.8625	52.5012	45.6211	34.5998
2345	131.012	125.691	121.14	117.084	113.369	109.902	106.616	103.466	100.414	97.433	94.4963	91.5821	88.6691	85.7357	82.759	79.7135	76.5688	73.2885	69.8224	66.1003	62.0172	57.3929	51.9087	44.7634	32.7265
2350	130.953	125.623	121.064	117	113.277	109.802	106.508	103.349	100.289	97.2982	94.3512	91.4257	88.5	85.5525	82.5599	79.4963	76.3309	73.0267	69.525	65.7616	61.6202	56.9204	51.2935	43.8632	30.5037
2355	130.894	125.555	120.987	116.916	113.186	109.702	106.4	103.233	100.164	97.1635	94.2061	91.2692	88.3309	85.3693	82.3608	79.279	76.093	72.7591	69.2276	65.42	61.2226	56.4325	50.6632	42.9137	27.7258
2360	130.834	125.487	120.911	116.832	113.094	109.602	106.292	103.117	100.039	97.0287	94.061	91.1127	88.1618	85.1861	82.1617	79.0618	75.8518	72.4909	68.9283	65.0783	60.8189	55.9424	50.0191	41.9069	23.8399
2365	130.775	125.419	120.835	116.748	113.002	109.502	106.184	103	99.9129	96.893	93.915	90.9557	87.9926	85.0028	81.9619	78.8415	75.6086	72.2227	68.6228	64.7285	60.4074	55.4348	49.3448	40.8333	15.9247
2370	130.716	125.351	120.759	116.664	112.91	109.403	106.076	102.883	99.7867	96.757	93.7683	90.7972	87.8211	84.8167	81.7592	78.6199	75.3654	71.9534	68.3172	64.3763	59.9958	54.9242	48.6532	39.6818
2375	130.657	125.283	120.683	116.58	112.818	109.303	105.968	102.766	99.6606	96.621	93.6216	90.6388	87.6495	84.6306	81.5564	78.3984	75.1222	71.6784	68.0116	64.024	59.5696	54.3954	47.9416	38.4391
2380	130.597	125.215	120.607	116.496	112.726	109.203	105.86	102.649	99.5344	96.485	93.4749	90.4803	87.478	84.4444	81.3537	78.1768	74.8763	71.4035	67.6977	63.6613	59.1433	53.861	47.1965	37.0892
2385	130.538	125.147	120.531	116.412	112.634	109.103	105.752	102.532	99.4082	96.349	93.3283	90.3219	87.3065	84.2582	81.151	77.9543	74.6275	71.1285	67.3835	63.2978	58.7066	53.3097	46.4223	35.5837
2390	130.479	125.079	120.455	116.328	112.542	109.003	105.643	102.415	99.2821	96.213	93.1816	90.1634	87.135	84.0721	80.9473	77.7281	74.3788	70.8498	67.0693	62.9322	58.2646	52.7477	45.618	33.9006
2395	130.42	125.01	120.379	116.243	112.45	108.903	105.535	102.298	99.1559	96.077	93.0349	90.005	86.9629	83.884	80.7408	77.502	74.13	70.5677	66.7479	62.5568	57.8159	52.172	44.7788	31.9521
2400	130.361	124.943	120.303	116.159	112.358	108.803	105.426	102.181	99.0297	95.9405	92.8869	89.8445	86.7888	83.6947	80.5343	77.2758	73.8785	70.2857	66.4245	62.1813	57.3571	51.578	43.8992	29.6023
2405	130.301	124.875	120.227	116.075	112.267	108.703	105.318	102.064	98.9028	95.8031	92.7386	89.684	86.6148	83.5054	80.3278	77.0497	73.6238	70.0036	66.1011	61.7993	56.8943	50.975	42.9728	26.5985
2410	130.242	124.807	120.151	115.991	112.175	108.603	105.209	101.947	98.7755	95.6658	92.5902	89.5234	86.4407	83.3161	80.1213	76.8197	73.3692	69.7141	65.771	61.4112	56.4175	50.345	41.9919	22.1505
2415	130.183	124.74	120.075	115.908	112.083	108.502	105.101	101.829	98.6483	95.5285	92.4418	89.3629	86.2666	83.1268	79.9131	76.5887	73.1146	69.4245	65.4379	61.023	55.9383	49.7012	40.9475
2420	130.124	124.672	119.999	115.824	111.991	108.402	104.993	101.711	98.5211	95.3912	92.2935	89.2023	86.0925	82.9364	79.7026	76.3578	72.8566	69.1349	65.1048	60.6222	55.4422	49.0407	39.8288
2425	130.064	124.604	119.923	115.74	111.899	108.302	104.884	101.593	98.3939	95.2538	92.1451	89.0418	85.9171	82.7438	79.4921	76.1268	72.5958	68.8411	64.7646	60.2205	54.9439	48.3494	38.6231
2430	130.005	124.537	119.847	115.656	111.807	108.202	104.775	101.475	98.2667	95.1165	91.9967	88.8796	85.7404	82.5512	79.2816	75.8935	72.335	68.5436	64.4211	59.8123	54.4272	47.6385	37.3151
2435	129.947	124.469	119.771	115.572	111.715	108.102	104.666	101.358	98.1395	94.979	91.8465	88.7169	85.5636	82.3587	79.0711	75.6574	72.0742	68.246	64.0777	59.3962	53.9067	46.9048	35.8781
2440	129.888	124.401	119.695	115.488	111.623	108.002	104.557	101.24	98.0123	94.8402	91.6964	88.5541	85.3868	82.1661	78.8578	75.4212	71.8087	67.947	63.7258	58.9794	53.3679	46.1373	34.2618
2445	129.829	124.334	119.619	115.404	111.531	107.901	104.448	101.122	97.8841	94.7015	91.5462	88.3914	85.21	81.973	78.6431	75.1851	71.5413	67.641	63.3713	58.5479	52.8216	45.3355	32.4135
2450	129.77	124.266	119.544	115.32	111.438	107.801	104.339	101.004	97.7558	94.5627	91.3961	88.2286	85.0332	81.7769	78.4283	74.9479	71.274	67.335	63.0169	58.1165	52.259	44.4994	30.2311
2455	129.712	124.198	119.468	115.236	111.346	107.7	104.23	100.886	97.6275	94.424	91.2459	88.0659	84.8541	81.5809	78.2136	74.7064	71.0066	67.029	62.6514	57.673	51.6826	43.6237	27.4955
2460	129.653	124.131	119.392	115.152	111.254	107.6	104.121	100.767	97.4992	94.2852	91.0958	87.9018	84.6744	81.3848	77.9989	74.4649	70.7325	66.715	62.2854	57.2251	51.0945	42.7021	23.6876
2465	129.594	124.063	119.316	115.068	111.162	107.499	104.012	100.648	97.3709	94.1465	90.9449	87.7367	84.4948	81.1888	77.7797	74.2234	70.4583	66.4001	61.9166	56.7685	50.4832	41.7272	16.0863
2470	129.536	123.995	119.24	114.984	111.07	107.399	103.902	100.53	97.2426	94.0077	90.7929	87.5716	84.3151	80.9926	77.5605	73.9815	70.184	66.0851	61.5381	56.303	49.8611	40.6899
2475	129.477	123.928	119.164	114.9	110.978	107.298	103.793	100.411	97.1143	93.8675	90.6408	87.4065	84.1355	80.7928	77.3414	73.7343	69.9073	65.7633	61.1596	55.831	49.2157	39.5799
2480	129.418	123.861	119.089	114.816	110.886	107.198	103.683	100.292	96.9858	93.7273	90.4888	87.2414	83.9551	80.5931	77.1222	73.4871	69.6257	65.4389	60.7736	55.3468	48.5489	38.3847
2485	129.36	123.793	119.013	114.733	110.794	107.097	103.574	100.174	96.8563	93.587	90.3368	87.0763	83.7725	80.3934	76.901	73.2399	69.3441	65.1145	60.3819	54.8568	47.8648	37.0893
2490	129.301	123.726	118.937	114.649	110.702	106.997	103.464	100.055	96.7268	93.4468	90.1847	86.9099	83.5898	80.1936	76.6771	72.9925	69.0625	64.7836	59.9899	54.3524	47.1525	35.6512
2495	129.242	123.659	118.861	114.565	110.609	106.896	103.355	99.936	96.5973	93.3065	90.0327	86.7424	83.4071	79.9938	76.4532	72.7393	68.7749	64.4492	59.5842	53.8415	46.4105	34.0537
2500	129.184	123.591	118.786	114.481	110.517	106.795	103.245	99.8164	96.4678	93.1662	89.879	86.5748	83.2245	79.7902	76.2294	72.4861	68.4856	64.1147	59.1785	53.3156	45.642	32.2123
2505	129.125	123.524	118.71	114.397	110.425	106.694	103.135	99.6969	96.3383	93.026	89.725	86.4073	83.0418	79.5866	76.0055	72.2329	68.1962	63.7733	58.7644	52.7803	44.8427	30.0432
2510	129.066	123.457	118.634	114.313	110.333	106.593	103.026	99.5773	96.2088	92.8844	89.5709	86.2397	82.8567	79.383	75.7768	71.9792	67.9043	63.4281	58.3437	52.2311	44.0071	27.3137
2515	129.007	123.389	118.559	114.229	110.24	106.492	102.916	99.4578	96.0793	92.7425	89.4169	86.0722	82.6709	79.1794	75.548	71.7196	67.6067	63.083	57.92	51.6675	43.1234	23.5109
2520	128.949	123.322	118.483	114.145	110.148	106.391	102.806	99.3382	95.9493	92.6007	89.2629	85.9032	82.485	78.9753	75.3192	71.4601	67.3092	62.7293	57.4833	51.0933	42.1936	15.869
2525	128.891	123.255	118.407	114.061	110.056	106.291	102.695	99.2187	95.8186	92.4588	89.1088	85.733	82.2992	78.7677	75.0904	71.2005	67.0117	62.3728	57.0466	50.4967	41.2103
2530	128.833	123.187	118.332	113.977	109.964	106.19	102.585	99.0991	95.6878	92.3169	88.9541	85.5629	82.1133	78.56	74.8584	70.9394	66.7058	62.0163	56.5946	49.8906	40.1645
2535	128.775	123.12	118.256	113.893	109.871	106.089	102.475	98.9794	95.557	92.1751	88.798	85.3927	81.9262	78.3523	74.6244	70.6732	66.3996	61.6484	56.1407	49.2605	39.046
2540	128.716	123.053	118.18	113.809	109.779	105.988	102.365	98.8589	95.4262	92.0332	88.6418	85.2226	81.737	78.1446	74.3903	70.4069	66.0933	61.2798	55.6743	48.6121	37.831
2545	128.658	122.986	118.105	113.725	109.686	105.887	102.255	98.7384	95.2955	91.89	88.4856	85.0524	81.5478	77.9357	74.1563	70.1406	65.7807	60.9082	55.2021	47.9482	36.5045
2550	128.6	122.919	118.029	113.642	109.594	105.785	102.144	98.6178	95.1647	91.7464	88.3295	84.8803	81.3586	77.7237	73.9204	69.871	65.4653	60.5268	54.7187	47.2528	35.0495
2555	128.542	122.852	117.954	113.558	109.502	105.684	102.034	98.4973	95.0339	91.6029	88.1733	84.7074	81.1694	77.5117	73.6809	69.5976	65.1498	60.1454	54.2269	46.534	33.3964
2560	128.484	122.785	117.878	113.474	109.409	105.583	101.923	98.3768	94.9022	91.4593	88.0171	84.5345	80.9798	77.2997	73.4413	69.3242	64.8293	59.7556	53.7238	45.7911	31.4974
2565	128.425	122.718	117.803	113.39	109.317	105.481	101.812	98.2562	94.77	91.3157	87.859	84.3616	80.7871	77.0878	73.2018	69.0508	64.504	59.3605	53.2109	45.019	29.2268
2570	128.367	122.651	117.727	113.306	109.224	105.38	101.701	98.1357	94.6379	91.1721	87.7006	84.1887	80.5944	76.8731	72.9613	68.7714	64.1788	58.9642	52.6848	44.2044	26.32
2575	128.309	122.584	117.652	113.222	109.132	105.278	101.59	98.0152	94.5058	91.0285	87.5422	84.0158	80.4016	76.6566	72.7159	68.4905	63.8489	58.5545	52.1493	43.3532	22.0688
2580	128.251	122.517	117.576	113.138	109.039	105.177	101.48	97.8937	94.3737	90.8835	87.3838	83.8403	80.2089	76.4401	72.4705	68.2096	63.5133	58.1448	51.5963	42.4595	7.58379
2585	128.193	122.45	117.501	113.054	108.947	105.076	101.369	97.7722	94.2415	90.7381	87.2253	83.6645	80.0162	76.2236	72.2251	67.9266	63.1778	57.725	51.0364	41.5163
2590	128.134	122.383	117.425	112.97	108.854	104.974	101.258	97.6506	94.1094	90.5927	87.0669	83.4887	79.82	76.0071	71.9793	67.6378	62.837	57.2998	50.4521	40.5155
2595	128.076	122.316	117.35	112.886	108.761	104.873	101.147	97.529	93.9771	90.4474	86.9072	83.3129	79.6236	75.7859	71.7277	67.3489	62.4903	56.8696	49.8596	39.4471
2600	128.018	122.249	117.274	112.802	108.669	104.771	101.036	97.4074	93.8435	90.302	86.7464	83.1371	79.4271	75.5646	71.4762	67.0601	62.1437	56.4276	49.2453	38.2996
2605	127.96	122.182	117.199	112.718	108.576	104.669	100.924	97.2858	93.7099	90.1566	86.5856	82.9606	79.2306	75.3433	71.2246	66.7645	61.7902	55.9851	48.6126	37.059
2610	127.902	122.115	117.123	112.634	108.483	104.567	100.813	97.1643	93.5764	90.0112	86.4248	82.7817	79.0342	75.122	70.9724	66.4672	61.4319	55.5253	47.966	35.6865
2615	127.845	122.048	117.048	112.55	108.391	104.465	100.701	97.0427	93.4428	89.864	86.2641	82.6029	78.8345	74.8985	70.7143	66.1699	61.0735	55.0656	47.288	34.1677
2620	127.787	121.981	116.972	112.466	108.298	104.363	100.589	96.9204	93.3092	89.7167	86.1033	82.424	78.6341	74.6721	70.4563	65.8688	60.7052	54.5894	46.5894	32.4352
2625	127.729	121.914	116.897	112.382	108.205	104.261	100.477	96.7977	93.1757	89.5694	85.9416	82.2451	78.4337	74.4458	70.1982	65.5626	60.3344	54.1105	45.8687	30.4142
2630	127.671	121.847	116.821	112.298	108.113	104.16	100.366	96.675	93.0421	89.4221	85.7784	82.0663	78.2333	74.2194	69.9386	65.2563	59.9622	53.6158	45.1158	27.9483
2635	127.614	121.78	116.746	112.214	108.02	104.058	100.254	96.5523	92.9075	89.2748	85.6151	81.8854	78.0329	73.9929	69.6737	64.9485	59.578	53.1164	44.3271	24.6377
2640	127.556	121.714	116.671	112.13	107.927	103.956	100.142	96.4296	92.7724	89.1275	85.4518	81.7033	77.829	73.7612	69.4087	64.6328	59.1939	52.6001	43.5046	19.1608
2645	127.498	121.647	116.595	112.046	107.834	103.853	100.03	96.3069	92.6373	88.98	85.2885	81.5212	77.6245	73.5295	69.1438	64.3171	58.8027	52.0787	42.6428
2650	127.44	121.58	116.52	111.962	107.741	103.751	99.918	96.1841	92.5022	88.8306	85.1253	81.3391	77.4199	73.2978	68.8755	64.0013	58.4043	51.5371	41.7353
2655	127.383	121.514	116.444	111.878	107.648	103.648	99.8054	96.0614	92.3671	88.6813	84.9614	81.157	77.2154	73.0661	68.6033	63.6756	58.0059	50.9916	40.7742
2660	127.325	121.447	116.369	111.794	107.555	103.546	99.6928	95.9381	92.232	88.532	84.7955	80.9745	77.0108	72.8304	68.3311	63.3498	57.5926	50.4209	39.7505
2665	127.267	121.38	116.294	111.71	107.462	103.444	99.5802	95.8142	92.0969	88.3827	84.6295	80.789	76.8021	72.5931	68.0589	63.024	57.1791	49.843	38.6532
2670	127.209	121.313	116.218	111.626	107.369	103.341	99.4676	95.6903	91.9614	88.2333	84.4636	80.6035	76.5932	72.3558	67.7806	62.6882	56.7564	49.2448	37.4692
2675	127.152	121.247	116.143	111.541	107.276	103.239	99.355	95.5664	91.8246	88.084	84.2977	80.418	76.3843	72.1185	67.5007	62.3517	56.3266	48.6289	36.1829
2680	127.094	121.18	116.067	111.457	107.183	103.136	99.2424	95.4425	91.6879	87.9337	84.1318	80.2325	76.1753	71.8781	67.2207	62.0152	55.8927	48.0009	34.7577
2685	127.036	121.113	115.992	111.373	107.09	103.034	99.1298	95.3186	91.5512	87.7823	83.9653	80.047	75.9657	71.6349	66.9391	61.6678	55.4457	47.3408	33.1603
2690	126.979	121.047	115.917	111.289	106.997	102.931	99.0173	95.1947	91.4145	87.6308	83.7966	79.8588	75.7521	71.3916	66.6509	61.3199	54.9985	46.6636	31.3177
2695	126.921	120.98	115.841	111.205	106.903	102.828	98.9039	95.0708	91.2777	87.4793	83.6279	79.6697	75.5386	71.1483	66.3628	60.971	54.5328	45.9668	29.1305
2700	126.864	120.913	115.766	111.121	106.81	102.725	98.7904	94.9463	91.141	87.3279	83.4592	79.4806	75.325	70.9026	66.0747	60.611	54.0672	45.2336	26.3501
2705	126.807	120.847	115.691	111.037	106.717	102.622	98.6769	94.8211	91.0043	87.1764	83.2905	79.2915	75.1115	70.653	65.7802	60.2509	53.5844	44.4724	22.3705
2710	126.749	120.78	115.615	110.953	106.623	102.519	98.5633	94.6959	90.8659	87.0249	83.1218	79.1025	74.8956	70.4034	65.4834	59.887	53.0988	43.6804	12.8397
2715	126.692	120.714	115.54	110.868	106.53	102.416	98.4498	94.5708	90.7275	86.8715	82.9523	78.9116	74.6772	70.1538	65.1866	59.514	52.5961	42.8525
2720	126.635	120.647	115.465	110.784	106.436	102.313	98.3363	94.4456	90.589	86.7178	82.7807	78.7188	74.4588	69.9017	64.8864	59.141	52.0891	41.9829
2725	126.577	120.581	115.389	110.7	106.343	102.21	98.2228	94.3204	90.4506	86.5641	82.6091	78.5259	74.2403	69.6455	64.5805	58.7595	51.563	41.0603
2730	126.52	120.515	115.314	110.616	106.25	102.107	98.1093	94.1952	90.3121	86.4103	82.4374	78.333	74.0219	69.3892	64.2745	58.3727	51.0329	40.0824
2735	126.463	120.448	115.239	110.531	106.156	102.004	97.9957	94.07	90.1737	86.2566	82.2658	78.1401	73.7989	69.133	63.9675	57.9855	50.4796	39.041
2740	126.405	120.382	115.163	110.447	106.063	101.9	97.8812	93.9442	90.0352	86.1029	82.0942	77.9462	73.5753	68.8734	63.6517	57.584	49.921	37.9198
2745	126.348	120.315	115.088	110.363	105.969	101.797	97.7667	93.8176	89.8954	85.9484	81.9211	77.7493	73.3517	68.6101	63.336	57.1825	49.3393	36.7012
2750	126.291	120.249	115.012	110.278	105.876	101.693	97.6522	93.6911	89.7552	85.7922	81.7464	77.5524	73.1281	68.3468	63.0203	56.7725	48.7455	35.3704
2755	126.233	120.182	114.937	110.194	105.782	101.589	97.5377	93.5645	89.6149	85.6361	81.5717	77.3556	72.9022	68.0835	62.6948	56.3553	48.1349	33.8985
2760	126.176	120.116	114.862	110.11	105.688	101.486	97.4232	93.438	89.4746	85.48	81.397	77.1587	72.6732	67.8151	62.3687	55.9355	47.4998	32.2214
2765	126.119	120.049	114.787	110.026	105.594	101.382	97.3087	93.3114	89.3344	85.3239	81.2222	76.961	72.4442	67.5444	62.0426	55.5015	46.8503	30.2709
2770	126.061	119.983	114.711	109.941	105.5	101.278	97.1942	93.1849	89.1941	85.1677	81.0475	76.7599	72.2152	67.2736	61.7068	55.0674	46.1743	27.9052
2775	126.004	119.916	114.636	109.857	105.407	101.174	97.0797	93.0583	89.0538	85.0116	80.8704	76.5588	71.9858	67.0029	61.3697	54.6182	45.4709	24.7822
2780	125.947	119.85	114.561	109.772	105.313	101.071	96.9649	92.931	88.9124	84.8532	80.6924	76.3578	71.7511	66.7243	61.0325	54.1661	44.7444	19.8301
2785	125.89	119.784	114.485	109.688	105.219	100.967	96.8493	92.803	88.7702	84.6945	80.5144	76.1567	71.5163	66.4457	60.6847	53.7017	43.9909
2790	125.833	119.718	114.41	109.603	105.125	100.862	96.7338	92.6749	88.628	84.5359	80.3364	75.9546	71.2816	66.167	60.3358	53.2303	43.194
2795	125.776	119.651	114.335	109.519	105.031	100.758	96.6182	92.5469	88.4858	84.3772	80.1584	75.7491	71.0468	65.885	59.9864	52.7482	42.361
2800	125.719	119.585	114.259	109.434	104.937	100.653	96.5026	92.4189	88.3436	84.2186	79.98	75.5435	70.8072	65.598	59.625	52.2559	41.4863
2805	125.662	119.519	114.184	109.35	104.843	100.549	96.3871	92.2909	88.2014	84.0599	79.7986	75.338	70.5664	65.3109	59.2635	51.7529	40.5628
2810	125.605	119.452	114.109	109.266	104.749	100.445	96.2715	92.1629	88.0592	83.8996	79.6171	75.1325	70.3255	65.0239	58.8985	51.2383	39.5821
2815	125.548	119.386	114.033	109.181	104.654	100.34	96.156	92.0349	87.9158	83.7383	79.4357	74.9253	70.0847	64.7287	58.5237	50.7107	38.5343
2820	125.491	119.32	113.958	109.097	104.56	100.236	96.0404	91.9058	87.7716	83.577	79.2543	74.7151	69.8397	64.4328	58.1489	50.1719	37.4072
2825	125.434	119.254	113.883	109.012	104.466	100.131	95.9241	91.7762	87.6273	83.4157	79.0728	74.5048	69.5924	64.1368	57.7654	49.6155	36.1865
2830	125.377	119.187	113.807	108.927	104.372	100.027	95.8074	91.6467	87.4831	83.2544	78.8892	74.2946	69.3452	63.8358	57.3764	49.0507	34.8432
2835	125.32	119.121	113.732	108.843	104.277	99.9218	95.6907	91.5171	87.3388	83.0931	78.7041	74.0844	69.0979	63.5304	56.9868	48.4604	33.341
2840	125.263	119.055	113.657	108.758	104.183	99.8165	95.574	91.3876	87.1946	82.9306	78.519	73.8712	68.8465	63.2251	56.5825	47.8608	31.6353
2845	125.206	118.988	113.581	108.673	104.089	99.7113	95.4573	91.258	87.0504	82.7665	78.334	73.656	68.5925	62.917	56.1782	47.2375	29.635
2850	125.149	118.922	113.506	108.589	103.994	99.606	95.3406	91.1285	86.9047	82.6023	78.1489	73.4408	68.3384	62.6016	55.7647	46.5938	27.178
2855	125.092	118.856	113.431	108.504	103.9	99.5008	95.2239	90.9989	86.7583	82.4382	77.9631	73.2257	68.0844	62.2862	55.3441	45.9341	23.8679
2860	125.035	118.79	113.355	108.419	103.805	99.3956	95.1072	90.8678	86.6119	82.2741	77.7742	73.0105	67.8255	61.9698	54.9202	45.242	18.1919
2865	124.979	118.724	113.28	108.334	103.71	99.2903	94.9904	90.7366	86.4655	82.11	77.5852	72.7903	67.5642	61.6437	54.4821	44.5246
2870	124.922	118.658	113.205	108.25	103.615	99.1851	94.8725	90.6054	86.3192	81.9449	77.3963	72.5699	67.303	61.3176	54.044	43.7815
2875	124.865	118.592	113.129	108.165	103.52	99.0799	94.7546	90.4742	86.1728	81.7778	77.2074	72.3495	67.0417	60.9912	53.589	43.0079
2880	124.809	118.526	113.054	108.08	103.426	98.9744	94.6367	90.343	86.0264	81.6107	77.0185	72.1291	66.774	60.6538	53.1321	42.1883
2885	124.752	118.46	112.979	107.996	103.331	98.8683	94.5188	90.2119	85.8781	81.4437	76.826	71.9064	66.5051	60.3163	52.6608	41.329
2890	124.695	118.393	112.903	107.911	103.236	98.7622	94.4009	90.0807	85.7294	81.2766	76.633	71.6804	66.2362	59.9781	52.1838	40.4233
2895	124.639	118.327	112.828	107.826	103.141	98.6561	94.283	89.9488	85.5808	81.1095	76.4401	71.4545	65.9664	59.6285	51.6934	39.4631
2900	124.582	118.261	112.752	107.741	103.047	98.55	94.1651	89.8159	85.4321	80.9414	76.2471	71.2285	65.6894	59.2789	51.1947	38.4388
2905	124.525	118.195	112.677	107.656	102.951	98.4439	94.0472	89.683	85.2834	80.7712	76.0541	71.0026	65.4124	58.9267	50.6817	37.3389
2910	124.469	118.129	112.602	107.571	102.856	98.3378	93.9285	89.5501	85.1348	80.601	75.8581	70.7709	65.1354	58.5642	50.1596	36.1496
2915	124.412	118.063	112.526	107.486	102.761	98.2317	93.8093	89.4172	84.9859	80.4308	75.6609	70.5391	64.8541	58.2017	49.62	34.8427
2920	124.356	117.997	112.451	107.401	102.665	98.1256	93.6901	89.2843	84.8348	80.2605	75.4637	70.3073	64.5685	57.8331	49.0727	33.3863
2925	124.299	117.931	112.375	107.316	102.57	98.0195	93.571	89.1514	84.6837	80.0903	75.2665	70.0755	64.2829	57.4568	48.5018	31.7429
2930	124.242	117.865	112.3	107.231	102.475	97.9127	93.4518	89.0185	84.5327	79.9186	75.0692	69.8395	63.9973	57.0805	47.9235	29.8285
2935	124.186	117.799	112.225	107.146	102.379	97.8056	93.3326	88.884	84.3816	79.7451	74.8691	69.6015	63.7026	56.6926	47.3195	27.4917
2940	124.129	117.733	112.149	107.061	102.284	97.6986	93.2134	88.7492	84.2305	79.5716	74.6674	69.3636	63.4079	56.3016	46.7004	24.4251
2945	124.072	117.667	112.074	106.976	102.189	97.5916	93.0942	88.6145	84.0794	79.3981	74.4656	69.1256	63.1132	55.9069	46.0644	19.5566
2950	124.016	117.601	111.998	106.89	102.093	97.4846	92.9747	88.4798	83.9272	79.2246	74.2639	68.8845	62.8126	55.5001	45.3972
2955	123.959	117.535	111.923	106.805	101.998	97.3775	92.8542	88.345	83.7736	79.0511	74.0622	68.64	62.5082	55.0933	44.7111
2960	123.903	117.469	111.847	106.72	101.902	97.2705	92.7336	88.2103	83.62	78.8752	73.8572	68.3955	62.2039	54.6734	44.0026
2965	123.847	117.403	111.772	106.634	101.806	97.1635	92.6131	88.0756	83.4663	78.6982	73.6507	68.151	61.8961	54.2497	43.253
2970	123.79	117.337	111.697	106.549	101.71	97.0565	92.4925	87.94	83.3127	78.5212	73.4442	67.9038	61.5814	53.8185	42.4735
2975	123.734	117.271	111.621	106.464	101.614	96.949	92.3719	87.8033	83.1591	78.3443	73.2377	67.6523	61.2668	53.3766	41.6588
2980	123.678	117.205	111.546	106.378	101.518	96.841	92.2514	87.6666	83.0055	78.1673	73.0313	67.4009	60.9504	52.9318	40.8028
2985	123.621	117.139	111.47	106.293	101.422	96.733	92.1308	87.53	82.8493	77.9901	72.8205	67.1494	60.6248	52.4704	39.8983
2990	123.565	117.073	111.395	106.208	101.326	96.6249	92.0103	87.3933	82.6931	77.8095	72.609	66.895	60.2991	52.009	38.9365
2995	123.509	117.007	111.319	106.122	101.23	96.5169	91.8884	87.2566	82.5368	77.6288	72.3975	66.6362	59.9725	51.5271	37.9069
3000	123.452	116.941	111.244	106.037	101.134	96.4089	91.7664	87.12	82.3805	77.4482	72.186	66.3774	59.6352	51.0447	36.7968
3005	123.396	116.875	111.168	105.951	101.038	96.3009	91.6444	86.983	82.2242	77.2676	71.9739	66.1186	59.2979	50.5418	35.5912
3010	123.34	116.809	111.093	105.866	100.941	96.1929	91.5224	86.8443	82.0679	77.0869	71.7571	65.8556	58.9591	50.0369	34.2715
3015	123.283	116.743	111.017	105.78	100.845	96.0849	91.4004	86.7056	81.9101	76.9043	71.5402	65.589	58.6093	49.5093	32.7996
3020	123.227	116.677	110.941	105.694	100.748	95.9766	91.2784	86.5669	81.751	76.7198	71.3234	65.3224	58.2595	48.979	31.1242
3025	123.171	116.611	110.866	105.608	100.651	95.8675	91.1563	86.4282	81.5919	76.5353	71.1066	65.0558	57.9063	48.4233	29.1547
3030	123.114	116.545	110.79	105.523	100.555	95.7585	91.0343	86.2895	81.4328	76.3508	70.887	64.7827	57.5431	47.8608	26.7275
3035	123.058	116.48	110.715	105.437	100.458	95.6494	90.9112	86.1508	81.2737	76.1663	70.6645	64.5079	57.18	47.2767	23.4568
3040	123.002	116.414	110.639	105.351	100.361	95.5403	90.7877	86.0121	81.1146	75.9814	70.4421	64.233	56.8097	46.6762	17.8453
3045	122.946	116.348	110.563	105.266	100.265	95.4313	90.6641	85.8714	80.9546	75.7928	70.2197	63.9568	56.4324	46.0611
3050	122.89	116.282	110.488	105.18	100.168	95.3222	90.5406	85.7305	80.7926	75.6042	69.9972	63.6732	56.055	45.4157
3055	122.834	116.216	110.412	105.094	100.071	95.2131	90.417	85.5896	80.6305	75.4156	69.7689	63.3896	55.6647	44.7539
3060	122.777	116.15	110.336	105.008	99.9745	95.104	90.2935	85.4488	80.4684	75.227	69.5405	63.106	55.2721	44.0687
3065	122.721	116.084	110.261	104.922	99.8771	94.9949	90.17	85.3079	80.3063	75.0384	69.3121	62.8165	54.8745	43.3475
3070	122.665	116.018	110.185	104.836	99.7797	94.8847	90.0464	85.167	80.1442	74.8464	69.0838	62.5236	54.4656	42.5998
3075	122.609	115.952	110.109	104.75	99.6823	94.7745	89.9219	85.0262	79.9818	74.6535	68.8515	62.2307	54.0567	41.8206
3080	122.553	115.887	110.034	104.664	99.5848	94.6643	89.7967	84.8834	79.8166	74.4606	68.6168	61.9356	53.6327	41.0043
3085	122.497	115.821	109.958	104.578	99.4874	94.5541	89.6715	84.7403	79.6514	74.2678	68.3822	61.6328	53.2063	40.1359
3090	122.441	115.755	109.882	104.492	99.39	94.4439	89.5463	84.5971	79.4862	74.0749	68.1475	61.3299	52.7702	39.2186
3095	122.385	115.689	109.806	104.405	99.2926	94.3337	89.4212	84.454	79.321	73.8792	67.9104	61.027	52.325	38.2437
3100	122.329	115.623	109.731	104.319	99.1952	94.2235	89.296	84.3109	79.1558	73.6818	67.6691	60.7146	51.8743	37.2009
3105	122.273	115.557	109.655	104.233	99.0978	94.1133	89.1708	84.1677	78.9904	73.4843	67.4279	60.4011	51.4088	36.0776
3110	122.217	115.491	109.579	104.147	99.0004	94.0031	89.0456	84.0246	78.8218	73.2869	67.1866	60.0877	50.9407	34.8476
3115	122.161	115.426	109.503	104.061	98.9022	93.8917	88.9194	83.8794	78.6533	73.0894	66.9437	59.7662	50.4534	33.4872
3120	122.105	115.36	109.427	103.975	98.8039	93.7803	88.7925	83.7339	78.4848	72.8894	66.6954	59.4416	49.9645	31.975
3125	122.049	115.294	109.352	103.888	98.7057	93.6689	88.6656	83.5883	78.3163	72.6871	66.447	59.1169	49.4537	30.2204
3130	121.993	115.228	109.276	103.801	98.6075	93.5575	88.5387	83.4428	78.1478	72.4849	66.1987	58.7845	48.9401	28.1426
3135	121.937	115.162	109.2	103.715	98.5093	93.4461	88.4118	83.2973	77.9788	72.2827	65.9489	58.4479	48.4039	25.5117
3140	121.881	115.096	109.124	103.628	98.4111	93.3347	88.2849	83.1517	77.8068	72.0804	65.6931	58.1112	47.8609	21.7865
3145	121.825	115.031	109.048	103.541	98.3129	93.2233	88.158	83.0062	77.6348	71.8751	65.4373	57.766	47.2972	13.472
3150	121.769	114.965	108.972	103.455	98.2147	93.1119	88.0311	82.8582	77.4628	71.6678	65.1814	57.4165	46.7193
3155	121.713	114.899	108.896	103.368	98.1165	93.0005	87.9029	82.7101	77.2908	71.4605	64.9233	57.067	46.1258
3160	121.657	114.833	108.82	103.282	98.0183	92.8878	87.7741	82.562	77.1187	71.2532	64.6596	56.7064	45.5067
3165	121.602	114.767	108.744	103.195	97.9194	92.7751	87.6454	82.4139	76.9456	71.0458	64.3959	56.3433	44.874
3170	121.546	114.701	108.668	103.108	97.8203	92.6624	87.5167	82.2659	76.7699	70.8344	64.1321	55.9793	44.2127
3175	121.49	114.636	108.592	103.022	97.7212	92.5497	87.388	82.1178	76.5942	70.6217	63.8642	55.6014	43.5254
3180	121.434	114.57	108.516	102.935	97.6222	92.4371	87.2593	81.9692	76.4185	70.409	63.5921	55.2236	42.8152
3185	121.378	114.504	108.44	102.848	97.5231	92.3244	87.1306	81.8184	76.2428	70.1963	63.3199	54.8393	42.0735
3190	121.322	114.438	108.364	102.76	97.424	92.2117	87.0018	81.6677	76.0671	69.9832	63.0478	54.4458	41.2903
3195	121.267	114.372	108.288	102.673	97.325	92.099	86.8712	81.5169	75.889	69.7648	62.7682	54.0522	40.4707
3200	121.211	114.306	108.212	102.586	97.2259	91.9862	86.7406	81.3661	75.7094	69.5465	62.4871	53.6441	39.608
3205	121.155	114.241	108.136	102.499	97.1268	91.8721	86.61	81.2154	75.5299	69.3281	62.206	53.2337	38.6946
3210	121.099	114.175	108.06	102.412	97.0277	91.7581	86.4793	81.0646	75.3503	69.1098	61.9224	52.8154	37.7209
3215	121.043	114.109	107.984	102.325	96.928	91.644	86.3487	80.9123	75.1707	68.8884	61.6318	52.3869	36.6757
3220	120.987	114.043	107.908	102.238	96.828	91.53	86.218	80.7587	74.9909	68.6641	61.3412	51.9565	35.5453
3225	120.932	113.977	107.831	102.15	96.7281	91.416	86.0874	80.6051	74.8072	68.4397	61.0506	51.5085	34.3131
3230	120.876	113.911	107.755	102.063	96.6281	91.3019	85.9561	80.4516	74.6236	68.2153	60.7516	51.0606	32.9555
3235	120.82	113.846	107.679	101.976	96.5281	91.1879	85.8234	80.298	74.4399	67.9907	60.4508	50.5944	31.4104
3240	120.765	113.78	107.603	101.888	96.4281	91.0739	85.6908	80.1444	74.2562	67.76	60.1501	50.1254	29.6367
3245	120.709	113.714	107.526	101.801	96.3281	90.9593	85.5581	79.9907	74.0725	67.5293	59.8439	49.6399	27.5088
3250	120.654	113.648	107.45	101.713	96.2281	90.8438	85.4254	79.8341	73.8862	67.2986	59.5324	49.1483	24.7948
3255	120.598	113.582	107.374	101.625	96.1282	90.7284	85.2928	79.6776	73.6982	67.0678	59.2209	48.6396	20.8059
3260	120.542	113.516	107.297	101.537	96.0282	90.6129	85.1601	79.521	73.5102	66.8324	58.906	48.1235	7.67431
3265	120.487	113.45	107.221	101.45	95.9275	90.4974	85.0274	79.3645	73.3222	66.5949	58.5829	47.5873
3270	120.431	113.385	107.145	101.362	95.8265	90.3819	84.893	79.208	73.1342	66.3574	58.2599	47.0447
3275	120.375	113.319	107.068	101.274	95.7256	90.2665	84.7582	79.0514	72.9449	66.12	57.9344	46.4758
3280	120.32	113.253	106.992	101.187	95.6246	90.151	84.6234	78.8928	72.7523	65.879	57.599	45.8993
3285	120.264	113.187	106.916	101.099	95.5236	90.0355	84.4886	78.7331	72.5597	65.6344	57.2637	45.2968
3290	120.208	113.121	106.839	101.011	95.4227	89.919	84.3538	78.5734	72.3671	65.3898	56.9255	44.6771
3295	120.153	113.055	106.762	100.923	95.3217	89.802	84.219	78.4137	72.1745	65.1452	56.577	44.0407
3300	120.097	112.99	106.686	100.835	95.2207	89.685	84.0842	78.254	71.9815	64.8975	56.2285	43.3697
3305	120.041	112.924	106.609	100.746	95.1198	89.568	83.9485	78.0944	71.7841	64.6453	55.8752	42.678
3310	119.986	112.858	106.533	100.658	95.0188	89.451	83.8114	77.9333	71.5866	64.3931	55.5126	41.9619
3315	119.93	112.792	106.456	100.569	94.917	89.334	83.6744	77.7703	71.3892	64.1409	55.1501	41.2037
3320	119.875	112.726	106.379	100.481	94.815	89.217	83.5373	77.6074	71.1918	63.8852	54.7787	40.41
3325	119.819	112.66	106.303	100.393	94.713	89.1	83.4002	77.4444	70.9942	63.625	54.401	39.5768
3330	119.764	112.594	106.226	100.304	94.611	88.9828	83.2631	77.2814	70.7917	63.3647	54.0234	38.6971
3335	119.708	112.528	106.15	100.216	94.5089	88.8642	83.1261	77.1184	70.5892	63.1045	53.6306	37.762
3340	119.653	112.462	106.073	100.128	94.4069	88.7456	82.9888	76.9545	70.3867	62.8392	53.2368	36.7611
3345	119.597	112.396	105.996	100.039	94.3049	88.627	82.8493	76.788	70.1841	62.5704	52.836	35.6815
3350	119.542	112.331	105.919	99.9507	94.2029	88.5084	82.7099	76.6215	69.9811	62.3016	52.4248	34.508
3355	119.486	112.265	105.843	99.8617	94.1009	88.3897	82.5704	76.455	69.7732	62.0328	52.0136	33.2217
3360	119.431	112.199	105.766	99.7727	93.9989	88.2711	82.4309	76.2886	69.5653	61.756	51.5844	31.7818
3365	119.375	112.133	105.689	99.6837	93.8958	88.1525	82.2915	76.1221	69.3573	61.4781	51.1545	30.1408
3370	119.32	112.067	105.612	99.5947	93.7926	88.0339	82.152	75.9546	69.1494	61.2003	50.7117	28.2051
3375	119.264	112.001	105.535	99.5056	93.6895	87.9141	82.0126	75.7845	68.9399	60.9197	50.2617	25.813
3380	119.209	111.935	105.458	99.4166	93.5864	87.7938	81.8708	75.6143	68.7262	60.6321	49.8026	22.55
3385	119.153	111.869	105.381	99.3276	93.4833	87.6735	81.7288	75.4442	68.5126	60.3445	49.3309	16.7487
3390	119.098	111.803	105.304	99.2386	93.3802	87.5532	81.5869	75.274	68.2989	60.0569	48.8521
3395	119.042	111.737	105.227	99.1496	93.277	87.4329	81.4449	75.1038	68.0853	59.7611	48.3569
3400	118.987	111.671	105.15	99.0606	93.1739	87.3126	81.3029	74.9322	67.868	59.4632	47.8546
3405	118.931	111.605	105.073	98.9713	93.0708	87.1923	81.1609	74.7581	67.6483	59.1653	47.334
3410	118.876	111.539	104.996	98.8816	92.9673	87.0719	81.0189	74.5841	67.4286	58.8625	46.8035
3415	118.821	111.473	104.919	98.7918	92.863	86.9509	80.8747	74.41	67.2089	58.5536	46.2553
3420	118.765	111.407	104.842	98.7021	92.7587	86.8288	80.73	74.236	66.9888	58.2447	45.6911
3425	118.71	111.341	104.764	98.6123	92.6544	86.7067	80.5854	74.062	66.7627	57.9333	45.113
3430	118.654	111.275	104.687	98.5226	92.5501	86.5846	80.4408	73.8853	66.5366	57.6127	44.5087
3435	118.599	111.209	104.61	98.4328	92.4458	86.4625	80.2961	73.7071	66.3105	57.292	43.8921
3440	118.544	111.143	104.532	98.3431	92.3415	86.3404	80.1515	73.529	66.0844	56.9702	43.2459
3445	118.488	111.077	104.455	98.2534	92.2372	86.2183	80.0069	73.3508	65.854	56.637	42.5756
3450	118.433	111.011	104.378	98.1636	92.1329	86.0962	79.8596	73.1727	65.6211	56.3037	41.8838
3455	118.377	110.945	104.3	98.0739	92.0285	85.9737	79.7121	72.9944	65.3881	55.9693	41.1563
3460	118.322	110.879	104.223	97.984	91.9233	85.8497	79.5647	72.8119	65.1552	55.6226	40.3921
3465	118.267	110.813	104.146	97.8935	91.8178	85.7257	79.4173	72.6294	64.9199	55.2759	39.5926
3470	118.211	110.747	104.068	97.8029	91.7122	85.6017	79.2698	72.447	64.6797	54.9263	38.7511
3475	118.156	110.681	103.991	97.7124	91.6067	85.4777	79.1224	72.2645	64.4396	54.5652	37.8597
3480	118.1	110.615	103.913	97.6219	91.5011	85.3537	78.9745	72.082	64.1994	54.2041	36.9086
3485	118.045	110.549	103.835	97.5314	91.3955	85.2296	78.8241	71.897	63.958	53.8363	35.8864
3490	117.99	110.482	103.758	97.4408	91.29	85.1056	78.6737	71.7099	63.7102	53.4597	34.7786
3495	117.934	110.416	103.68	97.3503	91.1844	84.9813	78.5233	71.5229	63.4624	53.0831	33.5682
3500	117.879	110.35	103.602	97.2598	91.0789	84.8553	78.3729	71.3358	63.2146	52.6936	32.2338
3505	117.824	110.284	103.524	97.1692	90.973	84.7293	78.2226	71.1488	62.9657	52.3004	30.7263
3510	117.768	110.218	103.447	97.0787	90.8661	84.6033	78.0722	70.9607	62.7097	51.903	28.9942
3515	117.713	110.152	103.369	96.9881	90.7592	84.4773	77.9202	70.7688	62.4538	51.492	26.9005
3520	117.658	110.086	103.291	96.8967	90.6523	84.3513	77.7667	70.5769	62.1978	51.0809	24.2176
3525	117.602	110.02	103.213	96.8054	90.5454	84.2253	77.6132	70.385	61.9399	50.6544	20.2625
3530	117.547	109.954	103.136	96.714	90.4385	84.0993	77.4597	70.1931	61.6753	50.2241
3535	117.492	109.887	103.058	96.6226	90.3316	83.9728	77.3062	70.0012	61.4107	49.7838
3540	117.436	109.821	102.98	96.5313	90.2247	83.8447	77.1527	69.8042	61.146	49.3328
3545	117.381	109.755	102.902	96.4399	90.1178	83.7166	76.9992	69.6072	60.8773	48.8758
3550	117.326	109.688	102.824	96.3485	90.011	83.5885	76.8424	69.4102	60.6034	48.4023
3555	117.27	109.622	102.745	96.2572	89.9028	83.4603	76.6856	69.2132	60.3296	47.9251
3560	117.215	109.556	102.667	96.1658	89.7945	83.3322	76.5288	69.0162	60.0558	47.4272
3565	117.16	109.49	102.589	96.0744	89.6862	83.2041	76.372	68.8142	59.7741	46.9257
3570	117.104	109.423	102.511	95.9829	89.5779	83.076	76.2152	68.6117	59.4904	46.4015
3575	117.049	109.357	102.433	95.8906	89.4696	82.947	76.0584	68.4093	59.2067	45.8706
3580	116.994	109.291	102.354	95.7984	89.3613	82.8166	75.8995	68.2068	58.9202	45.3178
3585	116.938	109.225	102.276	95.7061	89.253	82.6862	75.7392	68.0044	58.6261	44.7518
3590	116.883	109.158	102.198	95.6139	89.1447	82.5559	75.579	67.7964	58.3319	44.1679
3595	116.828	109.092	102.12	95.5216	89.0364	82.4255	75.4187	67.5882	58.0377	43.5597
3600	116.772	109.026	102.042	95.4293	88.9271	82.2952	75.2585	67.38	57.7338	42.9383
3605	116.717	108.959	101.963	95.3371	88.8173	82.1648	75.0982	67.1718	57.4285	42.2833
3610	116.661	108.893	101.884	95.2448	88.7075	82.0345	74.9365	66.9626	57.1231	41.6052
3615	116.606	108.827	101.806	95.1526	88.5978	81.9024	74.7726	66.7483	56.8106	40.9037
3620	116.551	108.76	101.727	95.0603	88.488	81.7697	74.6087	66.5341	56.4933	40.1635
3625	116.495	108.694	101.648	94.9677	88.3782	81.637	74.4448	66.3198	56.176	39.3849
3630	116.44	108.627	101.569	94.8745	88.2684	81.5043	74.2809	66.1056	55.8529	38.5678
3635	116.385	108.561	101.491	94.7813	88.1586	81.3716	74.117	65.888	55.5228	37.7047
3640	116.329	108.494	101.412	94.6881	88.0488	81.2389	73.952	65.6673	55.1927	36.7867
3645	116.274	108.428	101.333	94.5948	87.9382	81.1062	73.7842	65.4466	54.8568	35.8029
3650	116.219	108.361	101.254	94.5016	87.8268	80.973	73.6164	65.2259	54.513	34.7402
3655	116.163	108.295	101.176	94.4084	87.7154	80.8378	73.4486	65.0052	54.1691	33.5824
3660	116.108	108.228	101.097	94.3152	87.6041	80.7026	73.2809	64.7779	53.8177	32.3098
3665	116.053	108.162	101.018	94.222	87.4927	80.5674	73.1131	64.5503	53.4592	30.8886
3670	115.997	108.096	100.939	94.1288	87.3813	80.4322	72.944	64.3228	53.1006	29.2515
3675	115.942	108.029	100.86	94.0355	87.27	80.297	72.7721	64.0952	52.7306	27.3179
3680	115.886	107.963	100.781	93.9417	87.1586	80.1619	72.6003	63.8635	52.3562	24.9136
3685	115.831	107.896	100.701	93.8475	87.0473	80.0267	72.4284	63.6287	51.981	21.5582
3690	115.776	107.829	100.622	93.7532	86.9349	79.8894	72.2565	63.3939	51.5895	15.1145
3695	115.72	107.762	100.543	93.659	86.8219	79.7516	72.0847	63.159	51.1981
3700	115.665	107.696	100.463	93.5648	86.7089	79.6138	71.9106	62.9218	50.7976
3705	115.609	107.629	100.384	93.4705	86.5958	79.476	71.7345	62.6792	50.3879
3710	115.554	107.562	100.305	93.3763	86.4828	79.3382	71.5583	62.4367	49.977
3715	115.498	107.496	100.225	93.2821	86.3698	79.2004	71.3821	62.1942	49.5475
3720	115.443	107.429	100.146	93.1878	86.2568	79.0626	71.206	61.95	49.118
3725	115.388	107.362	100.067	93.0936	86.1437	78.9233	71.0298	61.6993	48.6729
3730	115.332	107.296	99.9875	92.9994	86.0307	78.7827	70.8498	61.4486	48.222
3735	115.277	107.229	99.9076	92.904	85.9164	78.6421	70.6691	61.1978	47.7593
3740	115.221	107.162	99.8277	92.8087	85.8016	78.5016	70.4884	60.9452	47.2853
3745	115.166	107.096	99.7478	92.7134	85.6868	78.361	70.3076	60.6858	46.8012
3750	115.11	107.029	99.6679	92.6181	85.5721	78.2205	70.1269	60.4263	46.3021
3755	115.055	106.962	99.588	92.5228	85.4573	78.0799	69.9447	60.1668	45.7922
3760	115	106.895	99.5081	92.4275	85.3425	77.9381	69.7592	59.904	45.2658
3765	114.944	106.828	99.4282	92.3322	85.2277	77.7946	69.5736	59.6352	44.7247
3770	114.888	106.761	99.3483	92.2369	85.1129	77.6511	69.3881	59.3664	44.1686
3775	114.833	106.694	99.2684	92.1415	84.9981	77.5077	69.2025	59.0977	43.59
3780	114.777	106.627	99.1885	92.0462	84.8815	77.3642	69.017	58.8225	43.0016
3785	114.722	106.56	99.1086	91.9503	84.7648	77.2207	68.8268	58.5438	42.378
3790	114.666	106.494	99.0287	91.8539	84.6482	77.0772	68.6361	58.2651	41.739
3795	114.61	106.427	98.9484	91.7574	84.5315	76.9323	68.4455	57.9858	41.0765
3800	114.555	106.36	98.8678	91.6609	84.4149	76.7858	68.2548	57.6965	40.3765
3805	114.499	106.293	98.7873	91.5645	84.2983	76.6392	68.0642	57.4072	39.6498
3810	114.444	106.226	98.7067	91.468	84.1816	76.4927	67.8699	57.1178	38.8911
3815	114.388	106.159	98.6262	91.3716	84.065	76.3462	67.6739	56.8218	38.0879
3820	114.332	106.092	98.5456	91.2751	83.9475	76.1996	67.4778	56.5211	37.2338
3825	114.277	106.025	98.4651	91.1786	83.8289	76.0531	67.2818	56.2204	36.3275
3830	114.221	105.958	98.3845	91.0822	83.7103	75.9045	67.0857	55.9165	35.3586
3835	114.166	105.89	98.304	90.9855	83.5917	75.7547	66.8864	55.6037	34.3145
3840	114.11	105.823	98.2234	90.8879	83.4731	75.6049	66.6846	55.2909	33.18
3845	114.054	105.756	98.1429	90.7902	83.3545	75.4551	66.4828	54.9772	31.9306
3850	113.999	105.689	98.0623	90.6925	83.2359	75.3053	66.2811	54.6514	30.5196
3855	113.943	105.621	97.9816	90.5948	83.1173	75.1555	66.0793	54.3255	28.9223
3860	113.887	105.554	97.9004	90.4972	82.9987	75.0057	65.8738	53.9997	27.0266
3865	113.831	105.487	97.8191	90.3995	82.878	74.8527	65.6659	53.6599	24.6489
3870	113.775	105.42	97.7378	90.3018	82.7574	74.6995	65.4581	53.3202	21.3746
3875	113.719	105.352	97.6566	90.2041	82.6367	74.5463	65.2502	52.9795	15.1575
3880	113.664	105.285	97.5753	90.1065	82.516	74.393	65.0424	52.6248
3885	113.608	105.218	97.4941	90.0088	82.3954	74.2398	64.8294	52.27
3890	113.552	105.151	97.4128	89.9099	82.2747	74.0866	64.6151	51.9114
3895	113.496	105.083	97.3316	89.811	82.1541	73.9319	64.4008	51.5405
3900	113.44	105.016	97.2503	89.712	82.0334	73.775	64.1865	51.1696
3905	113.384	104.949	97.1691	89.613	81.9112	73.6182	63.9713	50.7893
3910	113.328	104.881	97.0878	89.5141	81.7883	73.4614	63.7502	50.401
3915	113.272	104.814	97.0066	89.4151	81.6655	73.3046	63.529	50.0128
3920	113.216	104.746	96.9246	89.3162	81.5427	73.1478	63.3079	49.6064
3925	113.161	104.678	96.8426	89.2172	81.4198	72.9907	63.0868	49.1994
3930	113.105	104.611	96.7606	89.1182	81.297	72.8301	62.8612	48.782
3935	113.049	104.543	96.6786	89.0193	81.1741	72.6695	62.6328	48.3548
3940	112.993	104.476	96.5966	88.9192	81.0513	72.5088	62.4044	47.9238
3945	112.937	104.408	96.5146	88.8189	80.9271	72.3482	62.176	47.4746
3950	112.88	104.34	96.4326	88.7186	80.802	72.1876	61.9458	47.0254
3955	112.824	104.273	96.3506	88.6182	80.6769	72.0269	61.7097	46.5538
3960	112.768	104.205	96.2686	88.5179	80.5517	71.8629	61.4735	46.0809
3965	112.711	104.138	96.1866	88.4176	80.4266	71.6983	61.2374	45.5865
3970	112.655	104.07	96.1045	88.3173	80.3015	71.5336	61.0012	45.0877
3975	112.599	104.002	96.0225	88.2169	80.1763	71.3689	60.7569	44.5658
3980	112.542	103.934	95.94	88.1166	80.0512	71.2043	60.5126	44.0389
3985	112.486	103.866	95.8571	88.0163	79.9246	71.0396	60.2682	43.4836
3990	112.43	103.799	95.7743	87.9148	79.7971	70.8717	60.0238	42.9217
3995	112.374	103.731	95.6915	87.813	79.6695	70.7028	59.7715	42.3306
4000	112.317	103.663	95.6087	87.7112	79.5419	70.5339	59.5184	41.7235
4005	112.261	103.595	95.5259	87.6095	79.4144	70.3649	59.2652	41.0958
4010	112.205	103.527	95.4431	87.5077	79.2868	70.196	59.0121	40.434
4015	112.148	103.459	95.3603	87.406	79.1593	70.0271	58.75	39.7505
4020	112.092	103.391	95.2775	87.3042	79.0317	69.8544	58.4875	39.0383
4025	112.036	103.323	95.1947	87.2024	78.9022	69.6809	58.225	38.2798
4030	111.979	103.255	95.1118	87.1007	78.7721	69.5075	57.9611	37.4846
4035	111.922	103.187	95.029	86.9989	78.642	69.3341	57.6886	36.6451
4040	111.866	103.119	94.9457	86.8956	78.5119	69.1606	57.4161	35.7525
4045	111.809	103.051	94.862	86.7923	78.3818	68.9869	57.1436	34.7959
4050	111.752	102.983	94.7783	86.689	78.2517	68.8087	56.8661	33.7617
4055	111.695	102.914	94.6947	86.5857	78.1216	68.6305	56.5829	32.6335
4060	111.638	102.846	94.611	86.4825	77.9913	68.4523	56.2997	31.391
4065	111.581	102.777	94.5273	86.3792	77.8585	68.2741	56.0166	30.0089
4070	111.524	102.709	94.4437	86.2759	77.7257	68.0958	55.7226	28.4014
4075	111.467	102.641	94.36	86.1726	77.5929	67.9153	55.428	26.5075
4080	111.41	102.572	94.2763	86.0693	77.4601	67.7321	55.1334	24.1426
4085	111.354	102.504	94.1927	85.9655	77.3272	67.5488	54.8321	20.8279
4090	111.297	102.435	94.109	85.8606	77.1944	67.3656	54.5253	14.2023
4095	111.24	102.367	94.0253	85.7557	77.0616	67.1823	54.2184
4100	111.183	102.298	93.941	85.6508	76.9273	66.999	53.9078
4105	111.126	102.23	93.8564	85.546	76.7917	66.8104	53.5878
4110	111.069	102.162	93.7719	85.4411	76.656	66.6218	53.2678
4115	111.012	102.093	93.6873	85.3362	76.5204	66.4332	52.9455
4120	110.955	102.025	93.6027	85.2313	76.3847	66.2446	52.6114
4125	110.897	101.956	93.5181	85.1264	76.2491	66.056	52.2772
4130	110.84	101.887	93.4335	85.0215	76.1134	65.8634	51.9405
4135	110.782	101.818	93.349	84.9153	75.9773	65.6691	51.5912
4140	110.724	101.749	93.2644	84.8087	75.8386	65.4748	51.2419
4145	110.667	101.68	93.1798	84.7021	75.7	65.2806	50.8876
4150	110.609	101.612	93.0952	84.5955	75.5613	65.0863	50.522
4155	110.551	101.543	93.0106	84.4889	75.4227	64.8886	50.1563
4160	110.494	101.474	92.9252	84.3823	75.284	64.6883	49.7805
4165	110.436	101.405	92.8396	84.2758	75.1454	64.488	49.3972
4170	110.378	101.336	92.7541	84.1692	75.0067	64.2877	49.0139
4175	110.321	101.267	92.6685	84.0626	74.8651	64.0874	48.6122
4180	110.263	101.198	92.583	83.9553	74.7232	63.8835	48.2098
4185	110.206	101.129	92.4974	83.8469	74.5814	63.6768	47.7975
4190	110.148	101.06	92.4119	83.7385	74.4396	63.4702	47.3745
4195	110.09	100.991	92.3263	83.6302	74.2978	63.2635	46.9489
4200	110.033	100.922	92.2408	83.5218	74.156	63.0568	46.5035
4205	109.975	100.852	92.1552	83.4134	74.0142	62.8451	46.058
4210	109.916	100.783	92.0697	83.305	73.8693	62.6317	45.5915
4215	109.857	100.713	91.984	83.1967	73.7242	62.4182	45.1217
4220	109.799	100.644	91.8974	83.0883	73.579	62.2047	44.6324
4225	109.74	100.574	91.8108	82.9796	73.4339	61.9909	44.1361
4230	109.681	100.505	91.7242	82.8693	73.2887	61.7702	43.619
4235	109.623	100.435	91.6376	82.759	73.1435	61.5495	43.0939
4240	109.564	100.366	91.551	82.6488	72.9983	61.3287	42.5429
4245	109.506	100.296	91.4645	82.5385	72.8496	61.108	41.9855
4250	109.447	100.227	91.3779	82.4283	72.701	60.8834	41.3943
4255	109.388	100.157	91.2913	82.318	72.5523	60.655	40.7905
4260	109.33	100.088	91.2047	82.2078	72.4036	60.4266	40.1615
4265	109.271	100.018	91.1181	82.0975	72.2549	60.1982	39.5014
4270	109.212	99.9485	91.0316	81.987	72.1062	59.9687	38.819
4275	109.154	99.8783	90.9443	81.8748	71.9564	59.732	38.1022
4280	109.095	99.8082	90.8566	81.7625	71.804	59.4954	37.3418
4285	109.037	99.7381	90.7689	81.6503	71.6516	59.2588	36.5428
4290	108.977	99.6679	90.6813	81.538	71.4992	59.0222	35.6972
4295	108.918	99.5978	90.5936	81.4258	71.3468	58.7777	34.7953
4300	108.858	99.5276	90.5059	81.3135	71.1943	58.5323	33.8251
4305	108.798	99.4575	90.4183	81.2013	71.0419	58.287	32.7717
4310	108.738	99.3873	90.3306	81.089	70.8866	58.0416	31.617
4315	108.678	99.3172	90.2429	80.9763	70.7303	57.7885	30.3383
4320	108.618	99.247	90.1552	80.862	70.5739	57.5338	28.8979
4325	108.558	99.1769	90.0676	80.7476	70.4175	57.2791	27.214
4330	108.499	99.1067	89.9796	80.6333	70.2612	57.0244	25.1826
4335	108.439	99.0366	89.8908	80.5189	70.1048	56.7607	22.5357
4340	108.379	98.9661	89.802	80.4046	69.9471	56.496	18.4964
4345	108.319	98.8951	89.7131	80.2902	69.7865	56.2313
4350	108.259	98.8242	89.6243	80.1759	69.626	55.9653
4355	108.199	98.7533	89.5355	80.0615	69.4654	55.69
4360	108.139	98.6824	89.4466	79.9462	69.3049	55.4146
4365	108.08	98.6115	89.3578	79.8296	69.1444	55.1392
4370	108.02	98.5405	89.269	79.713	68.9834	54.8582
4375	107.959	98.4696	89.1801	79.5965	68.8184	54.5714
4380	107.898	98.3987	89.0913	79.4799	68.6535	54.2846
4385	107.836	98.3278	89.0025	79.3634	68.4885	53.9977
4390	107.775	98.2568	88.9124	79.2468	68.3236	53.6986
4395	107.713	98.1859	88.8224	79.1302	68.1586	53.3995
4400	107.652	98.115	88.7323	79.0137	67.9935	53.1004
4405	107.591	98.0441	88.6423	78.8951	67.8238	52.7925
4410	107.529	97.9728	88.5522	78.7762	67.6542	52.4802
4415	107.468	97.9009	88.4621	78.6573	67.4846	52.1679
4420	107.407	97.8291	88.3721	78.5384	67.315	51.8491
4425	107.345	97.7572	88.282	78.4195	67.1453	51.5226
4430	107.284	97.6854	88.192	78.3006	66.975	51.1961
4435	107.223	97.6135	88.1019	78.1817	66.8004	50.8635
4440	107.161	97.5417	88.0118	78.0628	66.6258	50.5218
4445	107.1	97.4699	87.9206	77.9427	66.4512	50.18
4450	107.038	97.398	87.8293	77.8214	66.2767	49.8304
4455	106.976	97.3262	87.7379	77.7	66.1021	49.4721
4460	106.913	97.2543	87.6465	77.5787	65.9253	49.1138
4465	106.85	97.1825	87.5552	77.4573	65.7455	48.7434
4470	106.787	97.1106	87.4638	77.3359	65.5656	48.3673
4475	106.724	97.0388	87.3724	77.2146	65.3858	47.9907
4480	106.661	96.9664	87.2811	77.0932	65.206	47.5953
4485	106.597	96.8935	87.1897	76.9713	65.0261	47.1999
4490	106.534	96.8205	87.0983	76.8473	64.8415	46.7942
4495	106.471	96.7476	87.007	76.7233	64.6561	46.3778
4500	106.408	96.6746	86.9143	76.5994	64.4707	45.9594
4505	106.345	96.6017	86.8216	76.4754	64.2853	45.5203
4510	106.282	96.5287	86.7288	76.3515	64.0999	45.0812
4515	106.218	96.4558	86.636	76.2275	63.9118	44.622
4520	106.155	96.3828	86.5433	76.1036	63.7204	44.1582
4525	106.092	96.3099	86.4505	75.9792	63.5291	43.6766
4530	106.029	96.2369	86.3578	75.8525	63.3378	43.1859
4535	105.965	96.164	86.265	75.7258	63.1465	42.6768
4540	105.899	96.091	86.1722	75.5991	62.9537	42.1565
4545	105.834	96.0181	86.0795	75.4724	62.756	41.6137
4550	105.769	95.9442	85.9865	75.3457	62.5584	41.0611
4555	105.703	95.8699	85.8923	75.219	62.3608	40.4771
4560	105.638	95.7956	85.798	75.0923	62.1632	39.8817
4565	105.573	95.7214	85.7038	74.9648	61.9644	39.2548
4570	105.507	95.6471	85.6095	74.8352	61.7601	38.6023
4575	105.442	95.5728	85.5153	74.7056	61.5558	37.9275
4580	105.377	95.4986	85.421	74.576	61.3515	37.2099
4585	105.311	95.4243	85.3268	74.4464	61.1472	36.4551
4590	105.246	95.35	85.2325	74.3168	60.9409	35.6608
4595	105.181	95.2758	85.1382	74.1872	60.7295	34.8185
4600	105.116	95.2015	85.044	74.0577	60.518	33.9178
4605	105.05	95.1272	84.9489	73.9264	60.3066	32.9457
4610	104.984	95.053	84.853	73.7937	60.0952	31.8863
4615	104.917	94.9783	84.7572	73.6611	59.8796	30.7195
4620	104.849	94.9024	84.6613	73.5284	59.6606	29.4205
4625	104.781	94.8266	84.5655	73.3958	59.4415	27.9536
4630	104.713	94.7507	84.4696	73.2631	59.2225	26.2151
4635	104.645	94.6749	84.3738	73.1305	59.0035	24.0904
4640	104.577	94.5991	84.2779	72.9978	58.7765	21.2273
4645	104.51	94.5232	84.182	72.8619	58.5494	16.4063
4650	104.442	94.4474	84.0862	72.726	58.3223
4655	104.374	94.3716	83.9902	72.5901	58.0952
4660	104.306	94.2957	83.8926	72.4543	57.863
4665	104.238	94.2199	83.795	72.3184	57.6273
4670	104.171	94.144	83.6974	72.1825	57.3915
4675	104.103	94.0682	83.5998	72.0466	57.1558
4680	104.035	93.9922	83.5022	71.9085	56.9169
4685	103.966	93.9145	83.4046	71.7692	56.6719
4690	103.895	93.8368	83.307	71.6299	56.4269
4695	103.824	93.7591	83.2094	71.4907	56.1819
4700	103.754	93.6813	83.1118	71.3514	55.9343
4705	103.683	93.6036	83.0142	71.2121	55.6794
4710	103.612	93.5259	82.915	71.0728	55.4245
4715	103.542	93.4482	82.8155	70.9318	55.1696
4720	103.471	93.3705	82.716	70.7889	54.9112
4725	103.4	93.2928	82.6165	70.646	54.6457
4730	103.329	93.2151	82.517	70.5031	54.3802
4735	103.259	93.1374	82.4175	70.3602	54.1148
4740	103.188	93.0597	82.318	70.2173	53.8428
4745	103.117	92.9815	82.2185	70.0744	53.5659
4750	103.047	92.9015	82.119	69.9296	53.2891
4755	102.975	92.8216	82.0195	69.7829	53.0122
4760	102.901	92.7417	81.9183	69.6362	52.7237
4765	102.827	92.6618	81.8167	69.4894	52.4346
4770	102.753	92.5819	81.7151	69.3427	52.1456
4775	102.679	92.5019	81.6135	69.196	51.85
4780	102.605	92.422	81.512	69.0493	51.5477
4785	102.531	92.3421	81.4104	68.8998	51.2455
4790	102.457	92.2622	81.3088	68.7491	50.9407
4795	102.383	92.1823	81.2072	68.5983	50.6243
4800	102.309	92.1023	81.1056	68.4475	50.3079
4805	102.235	92.0224	81.004	68.2967	49.9912
4810	102.161	91.9406	80.9002	68.1459	49.6595
4815	102.087	91.8581	80.7963	67.995	49.3279
4820	102.013	91.7756	80.6924	67.8399	48.996
4825	101.936	91.6931	80.5885	67.6848	48.6479
4830	101.858	91.6106	80.4845	67.5298	48.2998
4835	101.78	91.5281	80.3806	67.3747	47.9491
4840	101.703	91.4455	80.2767	67.2196	47.5831
4845	101.625	91.363	80.1728	67.0645	47.2171
4850	101.547	91.2805	80.0689	66.9067	46.8432
4855	101.469	91.198	79.9641	66.7471	46.4578
4860	101.392	91.1155	79.8576	66.5874	46.0724
4865	101.314	91.033	79.7511	66.4277	45.67
4870	101.236	90.9487	79.6446	66.2681	45.2636
4875	101.158	90.8631	79.5381	66.1084	44.8491
4880	101.081	90.7776	79.4316	65.9472	44.4198
4885	101.003	90.6921	79.3251	65.7826	43.9899
4890	100.921	90.6065	79.2186	65.6181	43.5356
4895	100.839	90.521	79.1121	65.4535	43.0813
4900	100.757	90.4355	79.0056	65.289	42.6046
4905	100.675	90.35	78.8964	65.1244	42.123
4910	100.593	90.2644	78.787	64.9586	41.6191
4915	100.511	90.1789	78.6776	64.7889	41.1077
4920	100.43	90.0934	78.5682	64.6191	40.5703
4925	100.348	90.0078	78.4588	64.4494	40.026
4930	100.266	89.9191	78.3494	64.2796	39.4474
4935	100.184	89.8301	78.24	64.1099	38.8579
4940	100.102	89.7411	78.1306	63.9381	38.2377
4945	100.02	89.6521	78.0212	63.7628	37.5903
4950	99.9343	89.5631	77.9092	63.5875	36.9207
4955	99.8477	89.4741	77.7966	63.4122	36.2076
4960	99.7611	89.3851	77.6839	63.2369	35.456
4965	99.6745	89.2961	77.5713	63.0616	34.664
4970	99.5879	89.2071	77.4587	62.8824	33.8225
4975	99.5012	89.1181	77.346	62.7011	32.9203
4980	99.4146	89.0291	77.2334	62.5198	31.9435
4985	99.328	88.9374	77.1207	62.3385	30.8747
4990	99.2414	88.8444	77.0081	62.1572	29.6922
4995	99.1548	88.7514	76.8921	61.9751	28.3684
5000	99.0681	88.6584	76.7758	61.7874	26.8544
5005	98.9804	88.5655	76.6595	61.5997	25.0518
5010	98.8886	88.4725	76.5432	61.412	22.7706
5015	98.7968	88.3795	76.4269	61.2243	19.5571
5020	98.705	88.2865	76.3106	61.0367	12.8354
5025	98.6132	88.1935	76.1943	60.8434
5030	98.5213	88.1005	76.078	60.6489
5035	98.4295	88.0076	75.9604	60.4543
5040	98.3377	87.9104	75.84	60.2597
5045	98.2459	87.8129	75.7196	60.0652
5050	98.1541	87.7154	75.5993	59.8657
5055	98.0623	87.6179	75.4789	59.6637
5060	97.9686	87.5204	75.3585	59.4617
5065	97.871	87.4229	75.2381	59.2597
5070	97.7735	87.3254	75.1177	59.0577
5075	97.676	87.2279	74.9973	58.85
5080	97.5784	87.1304	74.8723	58.64
5085	97.4809	87.0329	74.7474	58.4301
5090	97.3833	86.9321	74.6224	58.2201
5095	97.2858	86.8295	74.4974	58.0101
5100	97.1882	86.7269	74.3725	57.7919
5105	97.0907	86.6243	74.2475	57.5733
5110	96.9927	86.5217	74.1226	57.3546
5115	96.8889	86.4191	73.9975	57.136
5120	96.785	86.3166	73.8674	56.9139
5125	96.6812	86.214	73.7374	56.6859
5130	96.5774	86.1114	73.6073	56.458
5135	96.4735	86.0088	73.4772	56.23
5140	96.3697	85.901	73.3472	56.0021
5145	96.2659	85.7927	73.2171	55.7641
5150	96.162	85.6845	73.087	55.526
5155	96.0582	85.5762	72.9551	55.288
5160	95.9513	85.4679	72.8193	55.0499
5165	95.8406	85.3596	72.6835	54.8032
5170	95.7299	85.2513	72.5478	54.5542
5175	95.6192	85.1431	72.412	54.3052
5180	95.5085	85.0348	72.2763	54.0562
5185	95.3978	84.9222	72.1405	53.798
5190	95.2871	84.8076	72.0047	53.5371
5195	95.1764	84.693	71.8629	53.2763
5200	95.0657	84.5784	71.7208	53.0154
5205	94.9519	84.4637	71.5787	52.7424
5210	94.8338	84.3491	71.4367	52.4687
5215	94.7156	84.2345	71.2946	52.195
5220	94.5974	84.1199	71.1525	51.9172
5225	94.4792	84.0053	71.0104	51.6295
5230	94.361	83.884	70.8619	51.3418
5235	94.2429	83.7624	70.7128	51.0542
5240	94.1247	83.6407	70.5638	50.7542
5245	94.0065	83.5191	70.4147	50.4513
5250	93.8807	83.3975	70.2657	50.1485
5255	93.7544	83.2758	70.1166	49.8372
5260	93.6281	83.1542	69.9659	49.5179
5265	93.5018	83.0326	69.8092	49.1986
5270	93.3755	82.9053	69.6524	48.8724
5275	93.2492	82.776	69.4957	48.5352
5280	93.123	82.6466	69.3389	48.1979
5285	92.9964	82.5173	69.1822	47.8526
5290	92.8614	82.3879	69.0254	47.4959
5295	92.7264	82.2586	68.8616	47.1391
5300	92.5913	82.1292	68.6964	46.7694
5305	92.4563	81.9998	68.5312	46.3914
5310	92.3212	81.862	68.366	46.0134
5315	92.1862	81.7242	68.2008	45.613
5320	92.0512	81.5864	68.0357	45.2118
5325	91.9103	81.4486	67.8632	44.7987
5330	91.7658	81.3108	67.6888	44.3722
5335	91.6213	81.1729	67.5143	43.9422
5340	91.4768	81.0351	67.3399	43.488
5345	91.3324	80.8904	67.1655	43.0338
5350	91.1879	80.7433	66.9905	42.5515
5355	91.0434	80.5963	66.806	42.067
5360	90.8919	80.4492	66.6214	41.5539
5365	90.7373	80.3021	66.4369	41.0361
5370	90.5827	80.1551	66.2523	40.4844
5375	90.4281	80.008	66.0678	39.925
5380	90.2735	79.8514	65.8763	39.3304
5385	90.1189	79.6943	65.6808	38.7162
5390	89.9618	79.5371	65.4852	38.0772
5395	89.7963	79.38	65.2897	37.3951
5400	89.6309	79.2229	65.0941	36.6838
5405	89.4654	79.0657	64.8924	35.9364
5410	89.3	78.9023	64.6849	35.1332
5415	89.1345	78.7342	64.4774	34.2737
5420	88.9669	78.5662	64.2699	33.3511
5425	88.7899	78.3981	64.0624	32.3514
5430	88.6128	78.2301	63.8459	31.257
5435	88.4358	78.062	63.6254	30.0466
5440	88.2587	77.8865	63.4049	28.6613
5445	88.0817	77.7066	63.1845	27.0728
5450	87.898	77.5268	62.9617	25.1468
5455	87.7086	77.3469	62.7272	22.6684
5460	87.5192	77.1671	62.4927	19.0238
5465	87.3298	76.9863	62.2582	4.98671
5470	87.1404	76.7937	62.0237
5475	86.9476	76.6011	61.7756
5480	86.7451	76.4085	61.5259
5485	86.5425	76.2159	61.2762
5490	86.34	76.0233	61.0265
5495	86.1374	75.8187	60.7622
5500	85.9304	75.6124	60.4962
5505	85.7139	75.4061	60.2301
5510	85.4974	75.1998	59.9616
5515	85.2809	74.993	59.6779
5520	85.0644	74.772	59.3942
5525	84.8375	74.551	59.1104
5530	84.6061	74.3299	58.8151
5535	84.3748	74.1089	58.5123
5540	84.1435	73.8799	58.2095
5545	83.9063	73.6431	57.9004
5550	83.6593	73.4063	57.5771
5555	83.4124	73.1695	57.2538
5560	83.1654	72.9279	56.9258
5565	82.913	72.6742	56.5804
5570	82.6495	72.4205	56.235
5575	82.386	72.1668	55.8821
5580	82.1224	71.907	55.513
5585	81.8496	71.6353	55.1438
5590	81.5686	71.3636	54.7591
5595	81.2876	71.0919	54.3644
5600	81.0067	70.8074	53.9676
5605	80.7077	70.5165	53.5454
5610	80.4084	70.2255	53.1231
5615	80.109	69.9299	52.6799
5620	79.7973	69.6185	52.2281
5625	79.4785	69.307	51.7604
5630	79.1598	68.9953	51.2766
5635	78.8309	68.662	50.7781
5640	78.4917	68.3287	50.26
5645	78.1526	67.9951	49.7233
5650	77.8017	67.6386	49.168
5655	77.4411	67.2821	48.5848
5660	77.0805	66.9204	47.9887
5665	76.7025	66.5392	47.35
5670	76.3194	66.158	46.6902
5675	75.9324	65.7615	46.0047
5680	75.5257	65.3541	45.2687
5685	75.119	64.943	44.4973
5690	74.6948	64.5077	43.6835
5695	74.2633	64.0725	42.8192
5700	73.8216	63.6125	41.8947
5705	73.3641	63.1476	40.8992
5710	72.901	62.6613	39.8195
5715	72.4162	62.165	38.6404
5720	71.9273	61.6465	37.3438
5725	71.4139	61.1168	35.9004
5730	70.8946	60.5595	34.2467
5735	70.3511	59.9941	32.3188
5740	69.7964	59.3913	29.9883
5745	69.2214	58.7745	26.9416
5750	68.626	58.1317	22.3179
5755	68.0179	57.4551
5760	67.3761	56.7544
5765	66.7181	56.0237
5770	66.0387	55.2463
5775	65.3231	54.432
5780	64.5832	53.5751
5785	63.8152	52.6689
5790	63.0146	51.7063
5795	62.1699	50.6789
5800	61.2867	49.5776
5805	60.3601	48.392
5810	59.3849	47.1102
5815	58.3553	45.6992
5820	57.2649	44.146
5825	56.1066	42.3981
5830	54.8655	40.407
5835	53.5289	38.0799
5840	52.0923	35.2273
5845	50.5167	31.4872
5850	48.7901	25.7032
5855	46.8636
5860	44.673
5865	42.1332
5870	39.0651
5875	35.1093
5880	29.2361
[truncated: 46 more columns]
